# Supplementary material for: β-Hydroxy-γ-lactones as nucleophiles in the Nicholas reaction for the synthesis of oxepene rings. Enantioselective formal synthesis of (−)-isolaurepinnacin and (+)-rogioloxepane A
Source: Royal Society of Chemistry journal article supplement (doi:10.1039/c4cc00389f), 2014-01-01

SUPPLEMENTARY INFORMATION

$\beta$ -Hydroxy- $\gamma$ -lactones as nucleophiles in the Nicholas  
reaction for the synthesis of oxepene rings.  
Enantioselective formal synthesis of (–)-  
isolaurepinnacin and (+)-rogioloxepane A

Julio Rodríguez-López,<sup>a</sup> Nuria Ortega,<sup>a</sup> Víctor S. Martín<sup>\*a</sup> and Tomás Martín<sup>\*a,b</sup>

<sup>a</sup>Instituto Universitario de Bio-Organica "Antonio González", CIBICAN, Departamento de Química Orgánica, Universidad de La Laguna (ULL), Avda. Astrofísico Francisco Sánchez 2, 38206-La Laguna, Spain. <sup>b</sup>Instituto de Productos Naturales y Agrobiología, Consejo Superior de Investigaciones Científicas (CSIC), Avda. Astrofísico Francisco Sánchez 3, 38206-La Laguna, Tenerife, Spain.

vmartin@ull.es; tmartin@ipna.csic.es

Table of Contents

|                                                                                                                                                                                                                                                                                                                                                                                  |        |
|----------------------------------------------------------------------------------------------------------------------------------------------------------------------------------------------------------------------------------------------------------------------------------------------------------------------------------------------------------------------------------|--------|
| 1. Materials and methods .....                                                                                                                                                                                                                                                                                                                                                   | S3     |
| 2. Experimental details for the preparation of compounds <b>10</b> , <i>syn</i> - <b>12</b> , <i>anti</i> - <b>12</b> , <i>syn</i> - <b>6</b> , <i>anti</i> - <b>6</b> , <i>cis</i> - <b>13</b> , <i>cis</i> - <b>5</b> , <i>trans</i> - <b>13</b> , <i>trans</i> - <b>5</b> , <b>14</b> , <b>15</b> , <b>16</b> , <b>17</b> , <b>18</b> , <b>19</b> , <b>3</b> , <b>4</b> ..... | S3-S13 |
| 3. <sup>1</sup> H NMR and <sup>13</sup> C NMR spectra of <b>10</b> in CDCl <sub>3</sub> .....                                                                                                                                                                                                                                                                                    | S14    |
| 4. <sup>1</sup> H NMR spectra of ( <i>S</i> )-Mosher's ester derivative from compound <b>10</b> in CDCl <sub>3</sub> .....                                                                                                                                                                                                                                                       | S15    |
| 5. <sup>1</sup> H NMR and <sup>13</sup> C NMR spectra of uncomplexed alkyne derivative from compound <i>syn</i> - <b>12</b> in CDCl <sub>3</sub> .....                                                                                                                                                                                                                           | S16    |
| 6. <sup>1</sup> H NMR and <sup>13</sup> C NMR spectra of terminal alkene derivative from <i>syn</i> - <b>12</b> in CDCl <sub>3</sub> .....                                                                                                                                                                                                                                       | S17    |
| 7. <sup>1</sup> H NMR and <sup>13</sup> C NMR spectra of <i>syn</i> - <b>6</b> in CDCl <sub>3</sub> .....                                                                                                                                                                                                                                                                        | S18    |
| 8. <sup>1</sup> H NMR and <sup>13</sup> C NMR spectra of uncomplexed alkyne derivative from compound <i>anti</i> - <b>12</b> in CDCl <sub>3</sub> in CDCl <sub>3</sub> .....                                                                                                                                                                                                     | S19    |
| 9. <sup>1</sup> H NMR and <sup>13</sup> C NMR spectra of terminal alkene derivative from <i>anti</i> - <b>12</b> in CDCl <sub>3</sub> .....                                                                                                                                                                                                                                      | S20    |
| 10. <sup>1</sup> H NMR and <sup>13</sup> C NMR spectra of <i>anti</i> - <b>6</b> in CDCl <sub>3</sub> .....                                                                                                                                                                                                                                                                      | S21    |
| 11. <sup>1</sup> H NMR and <sup>13</sup> C NMR spectra of <i>cis</i> - <b>5</b> in CDCl <sub>3</sub> .....                                                                                                                                                                                                                                                                       | S22    |
| 12. COSY and NOESY spectra of <i>cis</i> - <b>5</b> in CDCl <sub>3</sub> .....                                                                                                                                                                                                                                                                                                   | S23    |
| 13. <sup>1</sup> H NMR and <sup>13</sup> C NMR spectra of <i>trans</i> - <b>5</b> in CDCl <sub>3</sub> .....                                                                                                                                                                                                                                                                     | S24    |
| 14. NOESY spectra of <i>trans</i> - <b>5</b> in CDCl <sub>3</sub> .....                                                                                                                                                                                                                                                                                                          | S25    |
| 15. <sup>1</sup> H NMR and <sup>13</sup> C NMR spectra of <b>14</b> in CDCl <sub>3</sub> .....                                                                                                                                                                                                                                                                                   | S26    |
| 16. <sup>1</sup> H NMR and <sup>13</sup> C NMR spectra of <b>15</b> in CDCl <sub>3</sub> .....                                                                                                                                                                                                                                                                                   | S27    |
| 17. <sup>1</sup> H NMR and <sup>13</sup> C NMR spectra of propargylic alcohol derivative from <b>14</b> in CDCl <sub>3</sub> .....                                                                                                                                                                                                                                               | S28    |
| 18. <sup>1</sup> H NMR and <sup>13</sup> C NMR spectra of <b>16</b> in CDCl <sub>3</sub> .....                                                                                                                                                                                                                                                                                   | S29    |
| 19. <sup>1</sup> H NMR and <sup>13</sup> C NMR spectra of propargylic alcohol derivative from <b>15</b> in CDCl <sub>3</sub> .....                                                                                                                                                                                                                                               | S30    |

|     |                                                                                                                            |     |
|-----|----------------------------------------------------------------------------------------------------------------------------|-----|
| 20. | $^1\text{H}$ NMR in $\text{C}_6\text{D}_6$ and $^{13}\text{C}$ NMR spectra of <b>17</b> in $\text{CDCl}_3$ .....           | S31 |
| 21. | $^1\text{H}$ NMR and $^{13}\text{C}$ NMR spectra of major epoxy alcohol derivative from <b>16</b> in $\text{CDCl}_3$ ..... | S32 |
| 22. | $^1\text{H}$ NMR and $^{13}\text{C}$ NMR spectra of minor epoxy alcohol derivative from <b>16</b> in $\text{CDCl}_3$ ..... | S33 |
| 23. | $^1\text{H}$ NMR and $^{13}\text{C}$ NMR spectra of <b>18</b> in $\text{CDCl}_3$ .....                                     | S34 |
| 24. | $^1\text{H}$ NMR and $^{13}\text{C}$ NMR spectra of major epoxy alcohol derivative from <b>17</b> in $\text{CDCl}_3$ ..... | S35 |
| 25. | $^1\text{H}$ NMR and $^{13}\text{C}$ NMR spectra of minor epoxy alcohol derivative from <b>17</b> in $\text{CDCl}_3$ ..... | S36 |
| 26. | $^1\text{H}$ NMR and $^{13}\text{C}$ NMR spectra of <b>19</b> in $\text{CDCl}_3$ .....                                     | S37 |
| 27. | $^1\text{H}$ NMR and $^{13}\text{C}$ NMR spectra of <b>3</b> in $\text{CDCl}_3$ .....                                      | S38 |
| 28. | $^1\text{H}$ NMR and $^{13}\text{C}$ NMR spectra of <b>4</b> in $\text{CDCl}_3$ .....                                      | S39 |

## Materials and methods.

$^1\text{H}$  NMR spectra were recorded at 500, 400 or 300 MHz,  $^{13}\text{C}$  NMR spectra were recorded at 75 or 100 MHz, and chemical shifts are reported in ppm and referenced to the solvent peak. The temperature was calibrated with methanol and ethylene glycol standards. Melting points were taken on a capillary melting point apparatus and are uncorrected. Optical rotations were determined for solutions in chloroform. Column chromatographies were performed on silica gel, 60Å and 0.2-0.5mm. Compounds were visualized by use of UV light, 2.5% phosphomolybdic acid in ethanol or vanillin with acetic and sulfuric acid in ethanol with heating. All solvents were purified by standard techniques.<sup>1</sup> Reactions requiring anhydrous conditions were performed under nitrogen. Anhydrous magnesium sulfate was used for drying solutions.

### Preparation of the (4*R*,5*S*)-5-Ethyl-4-hydroxydihydrofuran-2(3*H*)-one (10).

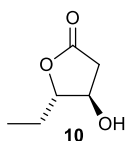

To a solution of commercially available methyl *trans*-3-hexenoate (15 mL, 13.7 g, 104.7 mmol) in acetonitrile (1.2 L) at 0°C was added buffer solution [600 mL of aqueous solution 0.05 M  $\text{Na}_2\text{B}_4\text{O}_7 \cdot 10\text{H}_2\text{O}$  and  $4 \cdot 10^{-4}$  M in  $\text{Na}_2(\text{EDTA})$ ], tetrabutylammonium hydrogen sulfate (1.5 g, 4.2 mmol) and the commercially available Shi's ketone **9** (13.8 g, 52.4 mmol). Immediately, two solutions were added simultaneously dropwise (with the aid of syringe pump): Oxone® [96.6 g, 157.1 mmol, dissolved in 390 mL of aqueous  $4 \cdot 10^{-4}$  M  $\text{Na}_2(\text{EDTA})$ ] and  $\text{K}_2\text{CO}_3$  (92.1 g, 659.6 mmol, dissolved in 390 mL of water) in a period of 1.5 h. After this time, the reaction mixture was diluted with hexane and water, and extracted with hexane (3 x 600 mL). The combined organic layers were dried over  $\text{MgSO}_4$ , filtered and concentrated (with several portions of acetone to obtain an azeotrope) to yield the crude epoxide as an oil, which was used without further purification.

A solution of the above crude epoxide in 3%  $\text{H}_2\text{SO}_4$  aqueous (1000 mL) was stirred at room temperature until TLC showed complete conversion (ca. 45 minutes). After this time, the reaction mixture was carefully neutralized with powder  $\text{NaHCO}_3$  until pH = 7. Then, the reaction mixture was saturated with NaCl and extracted  $\text{CH}_2\text{Cl}_2$  (3 x 500 mL). The combined organic extracts were dried over  $\text{MgSO}_4$ , filtered and concentrated under reduced pressure. Purification by column chromatography with silica gel (hexane/ethyl acetate = 1/2) and subsequent distillation at 120°C and 2 mmHg yielding *trans*-β-hydroxy-γ-lactone (**10**) (11.1 g, 81 % yield) as a colorless oil:  $[\alpha]_D^{25} - 18.6$  (*c* 1.4,  $\text{CHCl}_3$ );  $^1\text{H}$  NMR (400 MHz,  $\text{CDCl}_3$ )  $\delta$  0.96 (t,  $J = 7.5$  Hz, 3H), 1.60 (m, 2H), 2.45 (dd,  $J = 18.1, 3.4$  Hz, 1H), 2.76 (dd,  $J = 18.1, 6.6$  Hz, 1H), 3.91 (s, 1H), 4.25 (m, 2H);  $^{13}\text{C}$  NMR (100 MHz,  $\text{CDCl}_3$ )  $\delta$  9.6 (q), 26.1 (t), 37.7 (t), 71.1 (d), 89.6 (d), 176.2 (s); IR (film NaCl plates) ( $\text{cm}^{-1}$ ) 3434, 2973, 2941, 1770, 1191; HRMS (ESI)  $m/z$  calcd for  $\text{C}_6\text{H}_{10}\text{O}_3\text{Na}$   $[\text{M}+\text{Na}]^+$ : 153.0528, found: 153.0526.

**Preparation of the (4*R*,5*S*)-4-(((*S*)-6-Bromo-1-(trimethylsilyl)hex-1-yn-3-yl)oxy)-5-ethyldihydrofuran-2(3*H*)-one hexacarbonyl dicobalt complex (*syn*-12) and (4*R*,5*S*)-4-(((*R*)-6-Bromo-1-(trimethylsilyl)hex-1-yn-3-yl)oxy)-5-ethyldihydrofuran-2(3*H*)-one hexacarbonyl dicobalt complex (*anti*-12).**

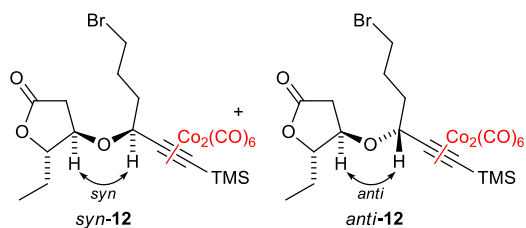

To a solution of cobalt complex **9** (300 mg, 0.56 mmol) and  $\gamma$ -lactone **10** (360 mg, 2.77 mmol) in dry  $\text{CH}_2\text{Cl}_2$  (1.2 mL) at  $0^\circ\text{C}$  under argon was added  $\text{BF}_3\cdot\text{OEt}_2$  (82  $\mu\text{L}$ , 0.66 mmol). After 2 hours the reaction was quenched adding a saturated solution of  $\text{NaHCO}_3$ , followed by extraction with  $\text{CH}_2\text{Cl}_2$ . The organic phase was dried over  $\text{MgSO}_4$  and the solvent removed under reduced pressure. This procedure was repeated 35 times in a carousel.<sup>1</sup> The crude was purified by column chromatography with silica gel (hexane/ethyl acetate = 9/1) to yield *syn*-**12** (4.45 g, 35 % yield) and *anti*-**12** (4.45 g, 35 % yield) both of them as a slurry red oil.

#### Preparation of the (3*S*,4*R*)-4-(((*S*)-Hex-5-en-1-yn-3-yl)oxy)hept-6-en-3-ol (*syn*-**6**).

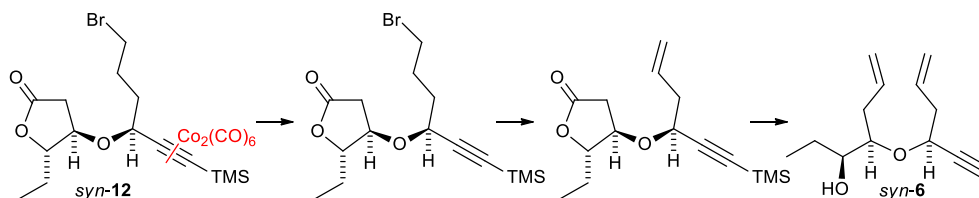

To a solution of *syn*-**12** (4.40 g, 6.80 mmol) in acetone (23 mL) at  $0^\circ\text{C}$  was added ceric ammonium nitrate (13.31 g, 23.8 mmol) portionwise. Then the reaction mixture was stirred at room temperature until TLC showed complete conversion (ca. 1 h), and then was poured into 30 mL of water and extracted with EtOAc (3 x 30 mL). The combined organic layers were dried over  $\text{MgSO}_4$ , filtered, concentrated and the crude was purified by column chromatography with silica gel (hexane/ethyl acetate = 6/1) to yield the uncomplexed alkyne (2.38 g, 97 % yield) as a colorless oil:  $^1\text{H}$  NMR (400 MHz,  $\text{CDCl}_3$ )  $\delta$  0.15 (s, 9H), 1.01 (t,  $J = 7.4$  Hz, 3H), 1.68 (m, 2H), 1.82 (m, 2H), 1.98 (m, 2H), 2.44 (dd,  $J = 18.0, 3.8$  Hz, 1H), 2.75 (dd,  $J = 17.9, 7.0$  Hz, 1H), 3.40 (t,  $J = 6.5$  Hz, 2H), 4.07 (t,  $J = 6.1$  Hz, 1H), 4.26 (m, 1H), 4.41 (m, 1H);  $^{13}\text{C}$  NMR (100 MHz,  $\text{CDCl}_3$ )  $\delta$  -0.1 (q), 9.5 (q), 26.4 (t), 28.4 (t), 33.3 (t), 34.3 (t), 35.0 (t), 68.3 (d), 76.3 (d), 86.9 (d), 92.2 (s), 103.2 (s), 174.7 (s); IR (film NaCl plates) ( $\text{cm}^{-1}$ ) 2966, 2941, 2171, 1784, 1251; HRMS (ESI)  $m/z$  calcd for  $\text{C}_{15}\text{H}_{25}^{79}\text{BrO}_3\text{SiNa}$  [ $\text{M}+\text{Na}$ ] $^+$ : 383.0654, found: 383.0644.

To a solution of *o*- $\text{NO}_2\text{PhSeCN}$  (1.80 g, 4.98 mmol) in EtOH (50 mL) at  $0^\circ\text{C}$  under argon was added  $\text{NaBH}_4$  (250 mg, 6.47 mmol). The mixture was stirred for 15 minutes and then the uncomplexed alkyne obtained before (1.8 g, 4.98 mmol) was added. After 15 minutes, the reaction mixture was warmed to room temperature and stirred for 3 h. Then, the reaction mixture was poured into 40 mL of water and extracted with  $\text{CH}_2\text{Cl}_2$  (3 x 100 mL). The combined organic layers were dried over  $\text{MgSO}_4$ , filtered and concentrated to yield a crude oil which was used in the next step without purification. The previous crude was dissolved in 60 mL of dry THF at  $0^\circ\text{C}$  was added  $\text{H}_2\text{O}_2$  35 wt. % solution in  $\text{H}_2\text{O}$  (0.51 mL, 5.98 mmol). After 15 minutes at  $0^\circ\text{C}$ , the reaction mixture was warmed to room temperature and stirred for 3 h. Then, the reaction mixture was poured into 60 mL of water and extracted with  $\text{CH}_2\text{Cl}_2$  (3 x 60 mL). The combined organic layers were dried over  $\text{MgSO}_4$ , filtered and concentrated under vacuum. Purification by column chromatography with silica gel (hexane/ethyl acetate = 9/1) afforded the terminal alkene (1.39 g, quantitative) as a slightly yellow oil:  $^1\text{H}$  NMR (400 MHz,  $\text{CDCl}_3$ )  $\delta$  0.17 (s, 9H), 1.03 (t,  $J = 7.4$  Hz, 3H), 1.70 (m, 2H), 2.43 (t,  $J = 6.7$  Hz, 2H), 2.48 (dd,  $J = 18.1, 3.9$  Hz, 1H), 2.76 (dd,  $J = 18.0, 7.0$  Hz, 1H), 4.04 (t,  $J = 6.5$  Hz, 1H), 4.28 (m, 1H),

1.- This reaction can be run in a multigram scale, however, we observed a detriment in the yield of about 10%.

4.43 (m, 1H), 5.11 (m, 2H), 5.80 (m, 1H);  $^{13}\text{C}$  NMR (100 MHz,  $\text{CDCl}_3$ )  $\delta$  -0.1 (q), 9.5 (q), 26.4 (t), 35.1 (t), 40.3 (t), 68.9 (d), 76.3 (d), 87.0 (d), 92.1 (s), 103.4 (s), 118.3 (t), 133.0 (d), 174.9 (s); IR (film NaCl plates) ( $\text{cm}^{-1}$ ) 3081, 2967, 2172, 1783, 1251; HRMS (ESI)  $m/z$  calcd for  $\text{C}_{15}\text{H}_{24}\text{O}_3\text{SiNa}$   $[\text{M}+\text{Na}]^+$ : 303.1392, found: 303.1396.

To a solution of the terminal alkene obtained before (1.20 g, 4.28 mmol) in dry  $\text{Et}_2\text{O}$  (43 mL) at  $-85^\circ\text{C}$  under argon atmosphere it was added a DIBAL-H solution (4.70 mL, 1 M in heptane). The reaction was monitored by TLC and quenched adding 0.5 mL of  $\text{H}_2\text{O}$ . After gel formation, it was added  $\text{MgSO}_4$  and filtered over a pad of Celite and washed several times with  $\text{EtOAc}$ . The solvent was removed under reduced pressure and the crude obtained was used without any further purification.

To a suspension of methyltriphenylphosphonium bromide (3.91 g, 10.7 mmol) in dry THF (40 mL) at  $0^\circ\text{C}$  under argon was added  $n\text{-BuLi}$  (0.94 mL of solution 10 M in hexane, 9.42 mmol) dropwise and the reaction mixture was stirred for 30 minutes. Then, this solution was added over a solution of the lactol obtained above in dry THF (30 mL) at  $-17^\circ\text{C}$  under argon. The reaction was kept at such temperature until TLC showed complete conversion (ca. 24 h), and then quenched adding 40 mL of  $\text{H}_2\text{O}$  and the reaction mixture was warmed to room temperature and stirred for 1/2 h. After this time, the reaction mixture was extracted with  $\text{CH}_2\text{Cl}_2$  (3 x 50 mL). The combined organic layers were dried over  $\text{MgSO}_4$ , filtered, concentrated and purified by column chromatography with silica gel (hexane/ethyl acetate: 9/1) to give the diene *syn*-**6** (796 mg, 89 % yield) as a colorless oil:  $^1\text{H}$  NMR (400 MHz,  $\text{CDCl}_3$ )  $\delta$  0.98 (td,  $J = 7.4, 2.0$  Hz, 3H), 1.48 (m, 2H), 2.05 (m, 1H), 2.25 (m, 1H), 2.35 (m, 1H), 2.46 (br, 3H), 3.65 (m, 2H), 4.18 (m, 1H), 5.10 (m, 4H), 5.85 (m, 2H);  $^{13}\text{C}$  NMR (100 MHz,  $\text{CDCl}_3$ )  $\delta$  10.5 (q), 25.1 (t), 33.9 (t), 40.5 (t), 68.5 (d), 74.2 (d), 74.3 (d), 80.9 (d), 83.2 (d), 117.3 (t), 118.0 (t), 133.4 (d), 135.2 (d); IR (film NaCl plates) ( $\text{cm}^{-1}$ ) 3458, 3304, 3079, 2967, 1080; HRMS (ESI)  $m/z$  calcd for  $\text{C}_{13}\text{H}_{20}\text{O}_2\text{Na}$   $[\text{M}+\text{Na}]^+$ : 231.1361, found: 231.1362.

#### Preparation of the (3*S*,4*R*)-4-(((*R*)-Hex-5-en-1-yn-3-yl)oxy)hept-6-en-3-ol (*anti*-**6**).

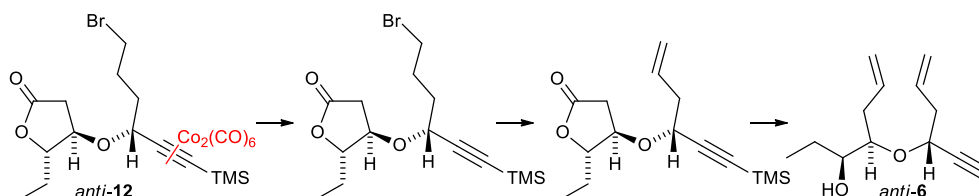

To a solution of *anti*-**12** (4.45 g, 6.87 mmol) in acetone (23 mL) at  $0^\circ\text{C}$  was added ceric ammonium nitrate (13.45 g, 24.0 mmol) portionwise. Then the reaction mixture was stirred at room temperature until TLC showed complete conversion (ca. 1 h), and then was poured into 30 mL of water and extracted with  $\text{EtOAc}$  (3 x 30 mL). The combined organic layers were dried over  $\text{MgSO}_4$ , filtered, concentrated and the crude was purified by column chromatography with silica gel (hexane/ethyl acetate = 6/1) to yield the uncomplexed alkyne (2.38 g, 96 % yield) as a colorless oil:  $^1\text{H}$  NMR (400 MHz,  $\text{CDCl}_3$ )  $\delta$  0.17 (s, 9H), 1.02 (t,  $J = 7.4$  Hz, 3H), 1.66 (m, 2H), 1.84 (m, 2H), 2.00 (m, 2H), 2.67 (dd,  $J = 18.2, 3.6$  Hz, 1H), 2.87 (dd,  $J = 18.2, 7.0$  Hz, 1H), 3.42 (t,  $J = 6.5$  Hz, 2H), 4.17 (m, 2H), 4.29 (m, 1H);  $^{13}\text{C}$  NMR (100 MHz,  $\text{CDCl}_3$ )  $\delta$  -0.1 (q), 9.6 (q), 26.6 (t), 28.5 (t), 33.3 (t), 34.4 (t), 36.1 (t), 68.5 (d), 77.0 (d), 85.8 (d), 92.6 (s), 103.3 (s), 175.1 (s); IR (film NaCl plates) ( $\text{cm}^{-1}$ ) 2965, 2882, 2171, 1784, 1251; HRMS (ESI)  $m/z$  calcd for  $\text{C}_{15}\text{H}_{25}^{79}\text{BrO}_3\text{SiNa}$   $[\text{M}+\text{Na}]^+$ : 383.0654, found: 383.0660.

To a solution of *o*- $\text{NO}_2\text{PhSeCN}$  (1.80 g, 4.98 mmol) in  $\text{EtOH}$  (50 mL) at  $0^\circ\text{C}$  under argon was added  $\text{NaBH}_4$  (250 mg, 6.47 mmol). The mixture was stirred for 15 minutes and then the uncomplexed alkyne obtained before (1.8 g, 4.98 mmol) was added. After 15 minutes, the reaction mixture was warmed to room temperature and stirred for 3 h. Then, the reaction mixture was poured into 40 mL of water and extracted

with CH<sub>2</sub>Cl<sub>2</sub> (3 x 100 mL). The combined organic layers were dried over MgSO<sub>4</sub>, filtered and concentrated to yield a crude oil which was used in the next step without purification. The previous crude was dissolved in 60 mL of dry THF at 0°C was added H<sub>2</sub>O<sub>2</sub> 35 wt. % solution in H<sub>2</sub>O (0.51 mL, 5.98 mmol). After 15 minutes at 0°C, the reaction mixture was warmed to room temperature and stirred for 3 h. Then, the reaction mixture was poured into 60 mL of water and extracted with CH<sub>2</sub>Cl<sub>2</sub> (3 x 60 mL). The combined organic layers were dried over MgSO<sub>4</sub>, filtered and concentrated under vacuum. Purification by column chromatography with silica gel (hexane/ethyl acetate = 9/1) afforded the terminal alkene (1.39 g, quantitative) as a slightly yellow oil: <sup>1</sup>H NMR (400 MHz, CDCl<sub>3</sub>) δ 0.16 (s, 9H), 1.02 (t, *J* = 7.4 Hz, 3H), 1.66 (p, *J* = 7.3 Hz, 2H), 2.43 (br, 2H), 2.68 (dd, *J* = 18.3, 3.8 Hz, 1H), 2.86 (dd, *J* = 18.2, 7.1 Hz, 1H), 4.14 (t, *J* = 6.5 Hz, 1H), 4.19 (m, 1H), 4.30 (m, 1H), 5.11 (m, 2H), 5.80 (m, 1H); <sup>13</sup>C NMR (100 MHz, CDCl<sub>3</sub>) δ -0.1 (q), 9.6 (q), 26.6 (t), 36.1 (t), 40.3 (t), 69.1 (d), 77.0 (d), 85.8 (d), 92.5 (s), 103.5 (s), 118.3 (t), 133.0 (d), 175.2 (s); IR (film NaCl plates) (cm<sup>-1</sup>) 3081, 2967, 2172, 1790, 1252; HRMS (ESI) *m/z* calcd for C<sub>15</sub>H<sub>24</sub>O<sub>3</sub>SiNa [M+Na]<sup>+</sup>: 303.1392, found: 303.1389.

To a solution of the terminal alkene obtained before (1.20 g, 4.28 mmol) in dry Et<sub>2</sub>O (43 mL) at -85°C under argon atmosphere it was added a DIBAL-H solution (4.70 mL, 1 M in heptane). The reaction was monitored by TLC and quenched adding 0.5 mL of H<sub>2</sub>O. After gel formation, it was added MgSO<sub>4</sub> and filtered over a pad of Celite and washed several times with EtOAc. The solvent was removed under reduced pressure and the crude obtained was used without any further purification.

To a suspension of methyltriphenylphosphonium bromide (3.91 g, 10.7 mmol) in dry THF (40 mL) at 0°C under argon was added *n*-BuLi (0.94 mL of solution 10 M in hexane, 9.42 mmol) dropwise and the reaction mixture was stirred for 30 minutes. Then, this solution was added over a solution of lactol obtained above in dry THF (30 mL) at -17°C under argon. The reaction was kept at such temperature until TLC showed complete conversion (ca. 24 h), and then quenched adding 40 mL of H<sub>2</sub>O and the reaction mixture was warmed to room temperature and stirred for 1/2 h. After this time, the reaction mixture was extracted with CH<sub>2</sub>Cl<sub>2</sub> (3 x 50 mL). The combined organic layers were dried over MgSO<sub>4</sub>, filtered, concentrated and purified by column chromatography with silica gel (hexane/ethyl acetate: 9/1) leading to the diene *anti*-**6** (796 mg, 89 % yield) as a colorless oil: <sup>1</sup>H NMR (400 MHz, CDCl<sub>3</sub>) δ 0.98 (t, *J* = 7.4 Hz, 3H), 1.47 (m, 2H), 1.98 (br, 1H), 2.26 (m, 1H), 2.41 (m, 2H), 2.48 (m, 2H), 3.64 (m, 2H), 4.22 (td, *J* = 6.5, 2.0 Hz, 1 H), 5.11 (m, 4H), 5.89 (m, 2H); <sup>13</sup>C NMR (100 MHz, CDCl<sub>3</sub>) δ 10.6 (q), 25.0 (t), 33.8 (t), 40.6 (t), 68.0 (d), 73.2 (d), 74.0 (d), 80.7 (d), 83.0 (d), 116.6 (t), 118.4 (t), 133.6 (d), 135.5 (d); IR (film NaCl plates) (cm<sup>-1</sup>) 3468, 3305, 3079, 2967, 2939, 1078; HRMS (ESI) *m/z* calcd for C<sub>13</sub>H<sub>20</sub>O<sub>2</sub>Na [M+Na]<sup>+</sup>: 231.1361, found: 231.1362.

#### Preparation of the (*S*)-1-((2*R*,7*S*)-7-Ethynyl-2,3,6,7-tetrahydrooxepin-2-yl)propan-1-ol (*cis*-**5**).

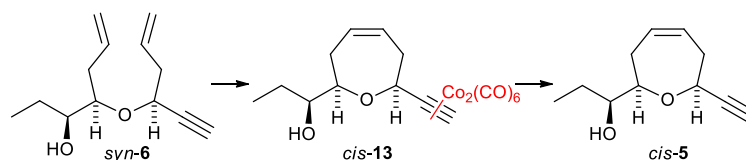

To a solution of the diene *syn*-**6** (500 mg, 2.40 mmol) in CH<sub>2</sub>Cl<sub>2</sub> (24 mL) under argon at room temperature was added Co<sub>2</sub>(CO)<sub>8</sub> (1.10 g, 2.88 mmol). The reaction mixture was stirred for 2 h. and then concentrated and purified by column chromatography with silica gel (hexane/ethyl acetate = 19/1) to give the hexacarbonyl dicobalt complex (1.19 g, quantitative) as a slurry red oil.

To a solution of the above cobalt complex (1.19 g, 2.40 mmol) in dry and degassed CH<sub>2</sub>Cl<sub>2</sub> (600 mL) under argon was added 2<sup>nd</sup> Generation Grubbs Catalyst (610 mg, 0.72 mmol). The mixture was stirred and refluxed

overnight. After this time, the reaction mixture was concentrated and purified by column chromatography with silica gel (hexane/ethyl acetate = 9/1) to give *cis*-**13** (940 mg, 84 % yield) as a slurry red oil.

To a solution of *cis*-**13** (900 mg, 1.87 mmol) in acetone (10 mL) at 0°C was added ceric ammonium nitrate (3.70 g, 6.55 mmol) portionwise. Then the reaction mixture was stirred at room temperature until TLC showed complete conversion (ca. 1 h), and then was poured into 10 mL of water and extracted with EtOAc (3 x 20 mL). The combined organic layers were dried over MgSO<sub>4</sub>, filtered, concentrated and the crude was purified by column chromatography with silica gel (hexane/ethyl acetate = 6/1) to yield *cis*-**5** (320 mg, 95 % yield) as a colorless oil: <sup>1</sup>H NMR (400 MHz, CDCl<sub>3</sub>) δ 0.98 (t, *J* = 7.4 Hz, 3H), 1.50 (m, 2H), 2.08 (br, 1H), 2.24 (ddd, *J* = 16.6, 8.1, 1.3 Hz, 1H), 2.42 (m, 3H), 2.66 (m, 1H), 3.36 (ddd, *J* = 10.4, 4.0, 1.6 Hz, 1H), 3.56 (m, 1H), 4.19 (dt, *J* = 10.5, 2.0 Hz, 1H), 5.72 (m, 1H), 5.84 (m, 1H); <sup>13</sup>C NMR (100 MHz, CDCl<sub>3</sub>) δ 10.4 (q), 25.4 (t), 31.5 (t), 38.5 (t), 70.4 (d), 72.3 (d), 75.7 (d), 83.4 (d), 83.7 (s), 128.3 (d), 130.6 (d); IR (film NaCl plates) (cm<sup>-1</sup>) 3427, 3296, 3024, 2966, 2934, 1101; HRMS (ESI) *m/z* calcd for C<sub>11</sub>H<sub>16</sub>O<sub>2</sub>Na [M+Na]<sup>+</sup>: 203.1048, found: 203.1045.

#### Preparation of the (*S*)-1-((2*R*,7*R*)-7-Ethynyl-2,3,6,7-tetrahydrooxepin-2-yl)propan-1-ol (*trans*-**5**).

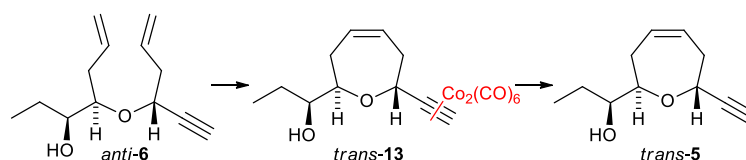

To a solution of the diene *anti*-**6** (500 mg, 2.40 mmol) in CH<sub>2</sub>Cl<sub>2</sub> (24 mL) under argon at room temperature was added Co<sub>2</sub>(CO)<sub>8</sub> (1.10 g, 2.88 mmol). The reaction mixture was stirred for 2 h. and then concentrated and purified by column chromatography with silica gel (hexane/ethyl acetate = 19/1) to give the hexacarbonyl dicobalt complex (1.19 g, quantitative) as a slurry red oil.

To a solution of the above cobalt complex (1.19 g, 2.40 mmol) in dry and degassed CH<sub>2</sub>Cl<sub>2</sub> (600 mL) under argon was added 2<sup>nd</sup> Generation Grubbs Catalyst (610 mg, 0.72 mmol). The mixture was stirred and refluxed overnight. After this time, the reaction mixture was concentrated and purified by column chromatography with silica gel (hexane/ethyl acetate = 9/1) to give *trans*-**13** (940 mg, 84 % yield) as a slurry red oil.

The same procedure to obtain the cycle *cis*-**5** was applied to compound *trans*-**13**. Thus, the procedure for decomplexation afforded the oxepene *trans*-**5** (320 mg, 95 % yield) as a colorless oil: <sup>1</sup>H NMR (400 MHz, CDCl<sub>3</sub>) δ 0.98 (t, *J* = 7.4 Hz, 3H), 1.49 (m, 2H), 2.24 (ddd, *J* = 16.6, 7.4, 1.5 Hz, 1H), 2.38 (m, 1H), 2.45 (d, *J* = 2.2 Hz, 1H), 2.50 (m, 1H), 2.62 (m, 1H), 2.91 (br, 1H), 3.54 (dt, *J* = 8.4, 4.0 Hz, 1H), 4.03 (ddd, *J* = 10.5, 3.8, 1.7, 1H), 4.82 (m, 1H), 5.72 (m, 1H), 5.87 (m, 1H); <sup>13</sup>C NMR (100 MHz, CDCl<sub>3</sub>) δ 10.4 (q), 25.3 (t), 30.8 (t), 35.7 (t), 66.4 (d), 74.4 (d), 75.3 (d), 76.0 (d), 82.3 (s), 127.1 (d), 130.9 (d); IR (film NaCl plates) (cm<sup>-1</sup>) 3427, 3296, 3028, 2967, 2934, 1097; HRMS (ESI) *m/z* calcd for C<sub>11</sub>H<sub>16</sub>O<sub>2</sub>Na [M+Na]<sup>+</sup>: 203.1048, found: 203.1052.

#### Isomerization of cycle-complex *trans*-**13** to cycle-complex *cis*-**13**.

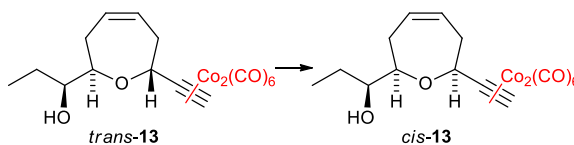

To a solution of *trans*-**13** (100 mg, 0.21 mmol) in dry CH<sub>2</sub>Cl<sub>2</sub> (43 mL) at 0°C under argon atmosphere was added BF<sub>3</sub>·OEt<sub>2</sub> (30 μL, 0.25 mmol). The reaction was kept at such temperature until TLC showed complete

conversion (ca. 1 h). After this time, the reaction was quenched adding a saturated solution of NaHCO<sub>3</sub>, followed by extraction with CH<sub>2</sub>Cl<sub>2</sub>. The organic phase was dried over MgSO<sub>4</sub> and the solvent removed under reduced pressure. Purification by column chromatography with silica gel (hexane/ethyl acetate = 9/1) afforded *cis*-**13** (94 mg, 94 % yield).

**Preparation of the *tert*-Butyl((*S*)-1-((2*R*,7*S*)-7-ethynyl-2,3,6,7-tetrahydrooxepin-2-yl)propoxy)dimethylsilane (**14**).**

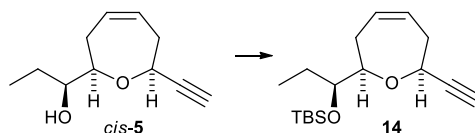

To a solution of alcohol *cis*-**5** (300 mg, 1.66 mmol) in dry CH<sub>2</sub>Cl<sub>2</sub> (3 mL) and under argon atmosphere, it was added triethylamine (0.95 mL, 6.64 mmol) and TBSOTf (0.78 mL, 3.32 mmol) at room temperature. The mixture was stirred and refluxed overnight. Then, the mixture was poured into a saturated aqueous NaHCO<sub>3</sub> (5 mL) and extracted with Et<sub>2</sub>O (3 x 10 mL). The combined organic layers were washed with a 5 % HCl aqueous solution (15 mL) and finally with brine (15 mL), dried over MgSO<sub>4</sub>, filtered, concentrated and the crude was purified by chromatographic column with silica gel and 2 % EtOAc/Hexane to give **14** (450 mg, 92 % yield) as a colorless oil: <sup>1</sup>H NMR (400 MHz, CDCl<sub>3</sub>) δ 0.07 (d, *J* = 8.0 Hz, 6H), 0.89 (s, 9H), 0.90 (t, *J* = 7.4 Hz, 3H), 1.49 (m, 1H), 1.66 (m, 1H), 2.26 (m, 1H), 2.42 (m, 3H), 2.63 (m, 1H), 3.25 (ddd, *J* = 10.2, 5.9, 1.7 Hz, 1H), 3.62 (q, *J* = 5.6, 1H), 4.14 (dt, *J* = 10.5, 2.1 Hz, 1H), 5.71 (m, 1H), 5.83 (m, 1H); <sup>13</sup>C NMR (100 MHz, CDCl<sub>3</sub>) δ -4.3 (q), -4.1 (q), 9.0 (q), 18.4 (s), 26.1 (q), 26.9 (t), 32.7 (t), 38.7 (t), 70.3 (d), 71.8 (d), 75.9 (d), 82.6 (d), 83.8 (s), 128.2 (d), 130.9 (d); IR (film NaCl plates) (cm<sup>-1</sup>) 3314, 3025, 2959, 2932, 1110; HRMS (ESI) *m/z* calcd for C<sub>17</sub>H<sub>30</sub>O<sub>2</sub>SiNa [M+Na]<sup>+</sup>: 317.1913, found: 317.1912.

**Preparation of the (2*R*,7*R*)-2-((*S*)-1-(Benzyloxy)propyl)-7-ethynyl-2,3,6,7-tetrahydrooxepine (**15**).**

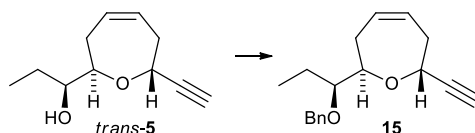

To a solution of alcohol *trans*-**5** (300 mg, 1.66 mmol) in dry THF (8 mL) at 0°C under argon was added sodium hydride (73 mg of 60 % dispersion in mineral oil, 1.83 mmol), benzyl bromide (0.24 mL, 1.99 mmol) and TBAI (cat.). The mixture was stirred and refluxed at 70°C until TLC showed complete conversion (ca. 10 h). Then, the mixture was quenched with saturated aqueous NH<sub>4</sub>Cl (8 mL) and extracted with Et<sub>2</sub>O (3 x 15 mL). The combined organic phases were dried over MgSO<sub>4</sub>, filtered, concentrated and the crude was purified by column chromatography with silica gel (2 % EtOAc/Hexane) yielding **15** (390 mg, 87 % yield) as a colorless oil: <sup>1</sup>H NMR (400 MHz, CDCl<sub>3</sub>) δ 0.97 (t, *J* = 7.4 Hz, 3H), 1.65 (m, 2H), 2.35 (m, 1H), 2.46 (m, 3H), 2.65 (m, 1H), 3.33 (q, *J* = 5.4 Hz, 1H), 4.11 (m, 1H), 4.57 (d, *J* = 11.4 Hz, 1H), 4.65 (d, *J* = 11.4 Hz, 1H), 4.84 (m, 1H), 5.74 (m, 1H), 5.90 (m, 1H), 7.31 (m, 5H); <sup>13</sup>C NMR (100 MHz, CDCl<sub>3</sub>) δ 9.6 (q), 23.4 (t), 32.2 (t), 36.1 (t), 66.1 (d), 72.3 (t), 74.1 (d), 74.4 (d), 82.4 (s), 83.0 (d), 127.3 (d), 127.5 (d), 128.0 (d), 128.4 (d), 131.3 (d), 139.0 (s); IR (film NaCl plates) (cm<sup>-1</sup>) 3293, 3029, 2933, 2877, 1100; HRMS (ESI) *m/z* calcd for C<sub>18</sub>H<sub>22</sub>O<sub>2</sub>Na [M+Na]<sup>+</sup>: 293.1517, found: 293.1512.

**Preparation of the (*E*)-3-((2*S*,7*R*)-7-((*S*)-1-((*tert*-Butyldimethylsilyl)oxy)propyl)-2,3,6,7-tetrahydrooxepin-2-yl)prop-2-en-1-ol (**16**).**

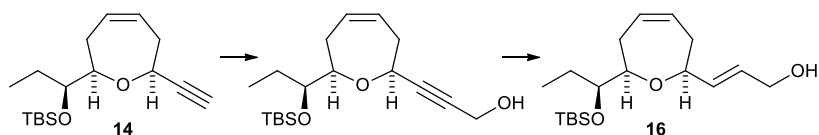

To a solution of alkyne **14** (360 mg, 1.22 mmol) in dry THF (6 mL) at  $-20^{\circ}\text{C}$  under argon atmosphere, it was added *n*-BuLi (0.13 mL of solution 10 M in hexane, 1.3 mmol), and the reaction mixture was stirred for 15 minutes. To this mixture it was added paraformaldehyde (54 mg, 1.71 mmol) and the reaction mixture was warmed at room temperature and stirred overnight. After this time, the mixture was poured into a saturated aqueous  $\text{NH}_4\text{Cl}$  (10 mL) and extracted with  $\text{Et}_2\text{O}$  (3 x 10 mL). The combined organic layers were dried over  $\text{MgSO}_4$ , filtered, concentrated and purified by column chromatography with silica gel (hexane/ethyl acetate = 4/1) to give the propargylic alcohol (370 mg, 93 % yield) as a colorless oil:  $^1\text{H}$  NMR (500 MHz,  $\text{CDCl}_3$ )  $\delta$  0.06 (d,  $J$  = 7.1 Hz, 6H), 0.88 (m, 12H), 1.48 (m, 1H), 1.65 (m, 1H), 2.06 (br, 1H), 2.21 (m, 1H), 2.41 (td,  $J$  = 16.2, 8.1 Hz, 2H), 2.60 (m, 1H), 3.25 (m, 1H), 3.59 (m, 1H), 4.16 (dd,  $J$  = 10.5, 1.4 Hz, 1H), 4.27 (br, 2H), 5.70 (m, 1H), 5.82 (m, 1H);  $^{13}\text{C}$  NMR (100 MHz,  $\text{CDCl}_3$ )  $\delta$  -4.3 (q), -4.2 (q), 8.9 (q), 18.3 (s), 26.1 (q), 26.7 (t), 32.9 (t), 38.7 (t), 51.2 (t), 70.5 (d), 75.7 (d), 82.2 (s), 82.5 (d), 85.7 (s), 128.2 (d), 130.9 (d); IR (film NaCl plates) ( $\text{cm}^{-1}$ ) 3359, 3023, 2932, 2858, 1108; HRMS (ESI)  $m/z$  calcd for  $\text{C}_{18}\text{H}_{32}\text{O}_3\text{SiNa}$  [ $\text{M}+\text{Na}$ ] $^{+}$ : 347.2018, found: 347.2024.

To a solution of the compound obtained before (250 mg, 0.77 mmol) in dry THF (8 mL) at room temperature under argon, it was added  $\text{LiAlH}_4$  (46 mg, 1.16 mmol). The reaction was monitored by TLC and quenched adding a drop of water. After gel formation, it was added  $\text{MgSO}_4$  and filtered over a pad of Celite and washed several times with  $\text{EtOAc}$ . The solvent was removed under reduced pressure and the crude obtained was purified by column chromatography with silica gel (hexane/ethyl acetate = 4/1) leading to the desired allylic alcohol **16** (230 mg, 92 % yield) as a colorless oil:  $^1\text{H}$  NMR (400 MHz,  $\text{CDCl}_3$ )  $\delta$  0.06 (d,  $J$  = 4.4 Hz, 6H), 0.88 (t,  $J$  = 7.4 Hz, 3H), 0.89 (s, 9H), 1.38 (br, 1H), 1.49 (m, 1H), 1.69 (m, 1H), 2.27 (m, 3H), 2.42 (m, 1H), 3.30 (m, 1H), 3.60 (q,  $J$  = 5.2, 1H), 3.91 (m, 1H), 4.14 (d,  $J$  = 5.0 Hz, 1H), 5.80 (m, 4H);  $^{13}\text{C}$  NMR (100 MHz,  $\text{CDCl}_3$ )  $\delta$  -4.2 (q), -4.2 (q), 8.7 (q), 18.3 (s), 26.1 (q), 26.7 (t), 33.3 (t), 37.8 (t), 63.4 (t), 76.0 (d), 79.6 (d), 81.9 (d), 128.8 (d), 128.8 (d), 130.4 (d), 133.5 (d); IR (film NaCl plates) ( $\text{cm}^{-1}$ ) 3352, 3021, 2932, 2859, 1105; HRMS (ESI)  $m/z$  calcd for  $\text{C}_{18}\text{H}_{34}\text{O}_3\text{SiNa}$  [ $\text{M}+\text{Na}$ ] $^{+}$ : 349.2175, found: 349.2177.

**Preparation of the (*E*)-3-((2*R*,7*R*)-7-((*S*)-1-(Benzyloxy)propyl)-2,3,6,7-tetrahydrooxepin-2-yl)prop-2-en-1-ol (**17**).**

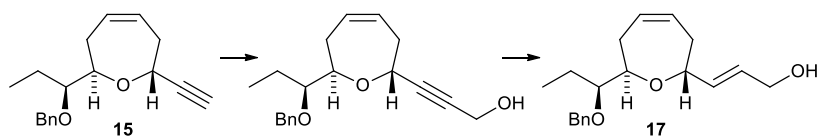

The same sequence of reactions to obtain the allylic alcohol **14** was applied to compound **15** (300 mg, 1.11 mmol). Thus, the procedure for homologation afforded the propargylic alcohol (313 mg, 94 % yield) as a colorless oil:  $^1\text{H}$  NMR (400 MHz,  $\text{CDCl}_3$ )  $\delta$  0.97 (t,  $J$  = 7.4 Hz, 3H), 1.64 (m, 2H), 1.86 (br. s, 1H), 2.40 (m, 3H), 2.63 (m, 1H), 3.33 (m, 1H), 4.08 (m, 1H), 4.26 (br, 2H), 4.58 (d,  $J$  = 11.5 Hz, 1H), 4.64 (d,  $J$  = 11.5 Hz, 1H), 4.86 (m, 1H), 5.71 (m, 1H), 5.86 (m, 1H), 7.32 (m, 5H);  $^{13}\text{C}$  NMR (100 MHz,  $\text{CDCl}_3$ )  $\delta$  9.5 (q), 23.3 (t), 32.3 (t), 36.1 (t), 51.1 (t), 66.3 (d), 72.3 (t), 74.1 (d), 83.0 (d), 84.4 (s), 84.5 (s), 127.4 (d), 127.6 (d), 127.9 (d), 128.4 (d), 131.1 (d), 139.0 (s); IR (film NaCl plates) ( $\text{cm}^{-1}$ ) 3412, 3029, 2931, 2877, 1097; HRMS (ESI)  $m/z$  calcd for  $\text{C}_{19}\text{H}_{24}\text{O}_3\text{Na}$  [ $\text{M}+\text{Na}$ ] $^{+}$ : 323.1623, found: 323.1624. And the alkyne reduction yielded the allylic alcohol **17** (300 mg, 95 % yield) as a colorless oil:  $^1\text{H}$  NMR (400 MHz,  $\text{C}_6\text{D}_6$ )  $\delta$  0.98 (td,  $J$  = 7.4, 1.7 Hz, 3H), 1.56 (m, 1H), 1.73 (m, 1H), 2.05 (dd,  $J$  = 17.4, 5.2 Hz, 1H), 2.38 (m, 2H), 2.51 (m, 1H), 3.35 (m,

1H), 3.84 (d,  $J = 3.8$  Hz, 2H), 4.16 (m, 1H), 4.50 (d,  $J = 11.7$  Hz, 1H), 4.55 (d,  $J = 11.7$  Hz, 1H), 4.61 (br, 1H), 5.57 (m, 1H), 5.71 (m, 3H), 7.11 (m, 1H), 7.19 (m, 2H), 7.35 (d,  $J = 7.4$  Hz, 2H);  $^{13}\text{C}$  NMR (100 MHz,  $\text{CDCl}_3$ )  $\delta$  9.7 (q), 23.8 (t), 30.5 (t), 35.1 (t), 63.3 (t), 72.6 (t), 75.0 (d), 76.2 (d), 83.0 (d), 127.6 (d), 127.9 (d), 128.1 (d), 128.4 (d), 129.4 (d), 129.6 (d), 133.1 (d), 139.1 (s); IR (film NaCl plates) ( $\text{cm}^{-1}$ ) 3407, 3024, 2926, 2877, 1098; HRMS (ESI)  $m/z$  calcd for  $\text{C}_{19}\text{H}_{26}\text{O}_3\text{Na}$   $[\text{M}+\text{Na}]^+$ : 325.1780, found: 325.1783.

**Preparation of the (R)-1-((2S,7R)-7-((S)-1-((tert-Butyldimethylsilyloxy)propyl)-2,3,6,7-tetrahydrooxepin-2-yl)propane-1,3-diol (18).**

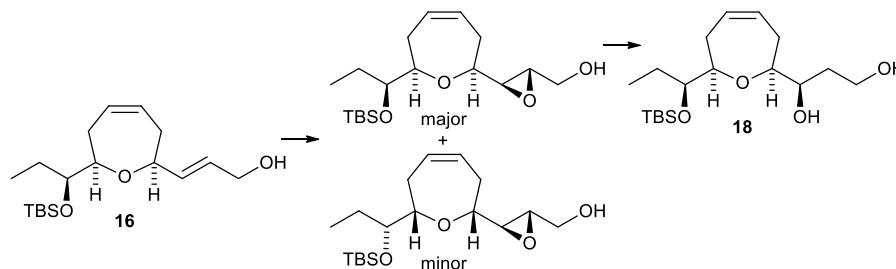

A mixture of powdered commercially activated 4Å molecular sieves (40 mg) and 3 mL of  $\text{CH}_2\text{Cl}_2$  was cooled to  $-20^\circ\text{C}$ . Then, *L*-(+)-Diethyl tartrate (0.14 mL, 0.81 mmol) and  $\text{Ti}(\text{OPr-}i)_4$  (0.21 mL, 0.70 mmol) were added sequentially. After 15 minutes it was added compound **16** (190 mg, 0.58 mmol). The reaction was kept at such temperature and stirred for an additional 30 min. and then TBHP (0.21 mL of solution 5.0 M in isooctane, 1.04 mmol) was added dropwise. After 8 h, a 15 % tartaric acid aqueous solution (5 mL) was added and the reaction mixture was warmed at room temperature and stirred vigorously for 30 minutes. The aqueous layer was extracted with  $\text{CH}_2\text{Cl}_2$  (3 x 10 mL), and the combined organic layers were concentrated and diluted in  $\text{Et}_2\text{O}$  (10 mL) and treated with solution of NaOH at 15 % (10 mL, at  $0^\circ\text{C}$ ) for 2 minutes. Finally, the aqueous layer was extracted with  $\text{Et}_2\text{O}$  (3 x 10 mL), and the combined organic layers were washed with brine, dried over  $\text{MgSO}_4$ , filtered, concentrated and the crude was purified by column chromatography with silica gel (hexane/ethyl acetate = 4/1) to yield 167 mg of the major epoxide (84 % yield) and 24 mg of the minor epoxide (12 % yield). Major epoxide:  $[\alpha]^{25}_{\text{D}} - 22.4$  (c 1.0,  $\text{CHCl}_3$ );  $^1\text{H}$  NMR (400 MHz,  $\text{CDCl}_3$ )  $\delta$  0.05 (d,  $J = 3.5$  Hz, 6H), 0.87 (t,  $J = 7.5$  Hz, 3H), 0.89 (s, 9H), 1.45 (m, 1H), 1.63 (m, 1H), 1.86 (br, 1H), 2.22 (m, 1H), 2.37 (m, 3H), 2.96 (m, 1H), 3.14 (m, 1H), 3.24 (dd,  $J = 10.0, 5.9$  Hz, 1H), 3.30 (m, 1H), 3.59 (m, 2H), 3.92 (d,  $J = 12.5$  Hz, 1H), 5.78 (m, 2H);  $^{13}\text{C}$  NMR (100 MHz,  $\text{CDCl}_3$ )  $\delta$  -4.3 (q), -4.2 (q), 8.9 (q), 18.3 (s), 26.1 (q), 26.7 (t), 32.9 (t), 34.3 (t), 57.2 (d), 57.5 (d), 61.7 (t), 76.0 (d), 79.2 (d), 81.8 (d), 128.1 (d), 130.4 (d); IR (film NaCl plates) ( $\text{cm}^{-1}$ ) 3443, 3021, 2931, 2858, 1254, 1118; HRMS (ESI)  $m/z$  calcd for  $\text{C}_{18}\text{H}_{34}\text{O}_4\text{SiNa}$   $[\text{M}+\text{Na}]^+$ : 365.2124, found: 365.2128. Minor epoxide:  $[\alpha]^{25}_{\text{D}} - 7.2$  (c 1.0,  $\text{CHCl}_3$ );  $^1\text{H}$  NMR (400 MHz,  $\text{CDCl}_3$ )  $\delta$  0.06 (d,  $J = 4.5$  Hz, 6H), 0.88 (t,  $J = 7.4$  Hz, 3H), 0.89 (s, 9H), 1.48 (m, 1H), 1.64 (m, 1H), 1.79 (br, 1H), 2.23 (m, 2H), 2.38 (m, 2H), 3.07 (dd,  $J = 5.1, 2.2$  Hz, 1H), 3.13 (m, 1H), 3.23 (ddd,  $J = 10.1, 5.8, 1.4$  Hz, 1H), 3.35 (ddd,  $J = 10.5, 5.1, 1.5$  Hz, 1H), 3.63 (m, 2H), 3.93 (d,  $J = 12.6$  Hz, 1H), 5.74 (m, 1H), 5.82 (m, 1H);  $^{13}\text{C}$  NMR (100 MHz,  $\text{CDCl}_3$ )  $\delta$  -4.3 (q), -4.2 (q), 8.9 (q), 18.3 (s), 26.1 (q), 26.7 (t), 32.8 (t), 33.8 (t), 55.8 (d), 58.0 (d), 61.5 (t), 76.0 (d), 79.5 (d), 82.2 (d), 128.2 (d), 130.5 (d); IR (film NaCl plates) ( $\text{cm}^{-1}$ ) 3447, 3022, 2931, 2858, 1255, 1115; HRMS (ESI)  $m/z$  calcd for  $\text{C}_{18}\text{H}_{34}\text{O}_4\text{SiNa}$   $[\text{M}+\text{Na}]^+$ : 365.2124, found: 365.2117.

To a solution of major epoxide (140 mg, 0.41 mmol) in dry THF (4 mL) at  $0^\circ\text{C}$  under argon was added Red-Al<sup>®</sup> (0.20 ml of solution 60 % in toluene, 0.62 mmol). The reaction was kept at such temperature until TLC showed complete conversion (ca. 8h). Then, the reaction mixture was quenched adding a drop of water. After gel formation, it was added  $\text{MgSO}_4$  and filtered over a pad of Celite and washed several times with  $\text{EtOAc}$ . The solvent was removed under reduced pressure and the crude obtained was purified by column chromatography with silica gel (hexane/ethyl acetate = 6/4) leading to the desired diol **18** (126 mg, 90 %

yield) as a colorless oil:  $[\alpha]_D^{25} - 3.0$  ( $c$  1.0,  $\text{CHCl}_3$ );  $^1\text{H}$  NMR (400 MHz,  $\text{CDCl}_3$ )  $\delta$  0.06 (d,  $J = 3.3$  Hz, 6H), 0.90 (m, 12H), 1.48 (m, 1H), 1.61 (m, 1H), 1.74 (m, 1H), 2.26 (m, 4H), 2.71 (br, 1H), 2.86 (br, 1H), 3.32 (m, 1H), 3.37 (m, 1H), 3.56 (dd,  $J = 10.4, 4.5$  Hz, 1H), 3.79 (m, 1H), 3.85 (t,  $J = 5.5$  Hz, 1H), 5.79 (m, 2H);  $^{13}\text{C}$  NMR (100 MHz,  $\text{CDCl}_3$ )  $\delta$  -4.3 (q), -4.1 (q), 9.6 (q), 18.3 (s), 26.1 (q), 26.1 (t), 32.3 (t), 32.8 (t), 33.9 (t), 61.6 (t), 74.2 (d), 76.4 (d), 82.9 (d), 82.9 (d), 129.1 (d), 129.8 (d); IR (film NaCl plates) ( $\text{cm}^{-1}$ ) 3383, 3022, 2931, 2859, 1254, 1104; HRMS (ESI)  $m/z$  calcd for  $\text{C}_{18}\text{H}_{36}\text{O}_4\text{SiNa}$   $[\text{M}+\text{Na}]^+$ : 367.2281, found: 367.2276.

**Preparation of the (S)-1-((2S,7R)-7-((S)-1-(Benzyloxy)propyl)-2,3,6,7-tetrahydrooxepin-2-yl)propane-1,3-diol (19).**

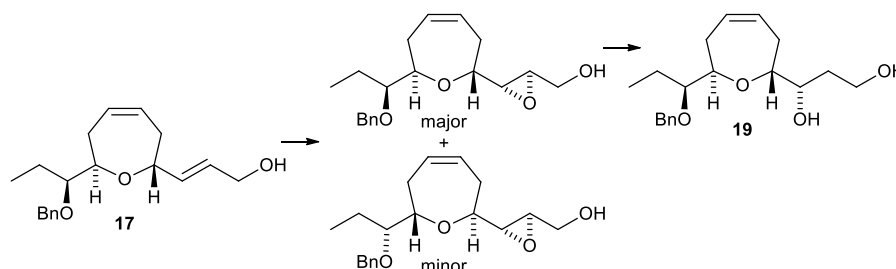

A mixture of powdered commercially activated 4Å molecular sieves (40 mg) and 3 mL of  $\text{CH}_2\text{Cl}_2$  was cooled to  $-20^\circ\text{C}$ . Then, *D*-(–)-Diethyl tartrate (0.13 mL, 0.78 mmol) and  $\text{Ti}(\text{OPr-}i)_4$  (0.20 mL, 0.68 mmol) were added sequentially. After 15 minutes it was added compound **17** (170 mg, 0.56 mmol). The reaction was kept at such temperature and stirred for an additional 30 min. and then TBHP (0.20 mL of solution 5.0 M in isooctane, 1.00 mmol) was added dropwise. After 8 h, a 15 % tartaric acid aqueous solution (5 mL) was added and the reaction mixture was warmed at room temperature and stirred vigorously for 30 minutes. The aqueous layer was extracted with  $\text{CH}_2\text{Cl}_2$  (3 x 10 mL), and the combined organic layers were concentrated and diluted in  $\text{Et}_2\text{O}$  (10 mL) and treated with solution of NaOH at 15 % (10 mL, at  $0^\circ\text{C}$ ) for 2 minutes. Finally, the aqueous layer was extracted with  $\text{Et}_2\text{O}$  (3 x 10 mL), and the combined organic layers were washed with brine, dried over  $\text{MgSO}_4$ , filtered, concentrated and the crude was purified by column chromatography with silica gel (hexane/ethyl acetate = 3/1) to yield 150 mg of the major epoxide (84 % yield) and 21 mg of the minor epoxide (12 % yield). Major epoxide:  $[\alpha]_D^{25} + 10.6$  ( $c$  1.0,  $\text{CHCl}_3$ );  $^1\text{H}$  NMR (400 MHz,  $\text{C}_6\text{D}_6$ )  $\delta$  0.96 (t,  $J = 7.4$ , 3H), 1.61 (m, 2H), 1.99 (br, 1H), 2.42 (m, 4H), 2.98 (dd,  $J = 5.5, 2.0$  Hz, 1H), 3.10 (m, 1H), 3.36 (m, 1H), 3.62 (m, 1H), 3.86 (d,  $J = 12.6$ , 1H), 3.97 (m, 1H), 4.13 (m, 1H), 4.60 (br, 2H), 5.70 (m, 2H), 7.28 (m, 1H), 7.34 (m, 4H);  $^{13}\text{C}$  NMR (100 MHz,  $\text{CDCl}_3$ )  $\delta$  9.7 (q), 23.6 (t), 30.3 (t), 31.7 (t), 57.3 (d), 57.4 (d), 61.6 (t), 72.6 (t), 75.0 (d), 77.0 (d), 82.7 (d), 127.5 (d), 127.6 (d), 127.9 (d), 128.4 (d), 129.3 (d), 140.0 (s); IR (film NaCl plates) ( $\text{cm}^{-1}$ ) 3422, 3026, 2929, 1456, 1097; HRMS (ESI)  $m/z$  calcd for  $\text{C}_{19}\text{H}_{26}\text{O}_4\text{Na}$   $[\text{M}+\text{Na}]^+$ : 341.1729, found: 341.1724. Minor epoxide:  $[\alpha]_D^{25} + 9.2$  ( $c$  1.0,  $\text{CHCl}_3$ );  $^1\text{H}$  NMR (400 MHz,  $\text{C}_6\text{D}_6$ )  $\delta$  0.96 (t,  $J = 7.3$ , 3H), 1.62 (m, 2H), 1.89 (br, 1H), 2.21 (dd,  $J = 17.2, 6.2$ , 1H), 2.37 (m, 1H), 2.53 (m, 2H), 3.07 (m, 1H), 3.15 (br, 1H), 3.39 (m, 1H), 3.63 (dd,  $J = 12.5, 3.2$ , 1H), 3.90 (d,  $J = 12.5$ , 1H), 4.12 (m, 2H), 4.62 (m, 2H), 5.69 (m, 2H), 7.28 (m, 1H), 7.33 (m, 4H);  $^{13}\text{C}$  NMR (100 MHz,  $\text{CDCl}_3$ )  $\delta$  9.8 (q), 23.9 (t), 30.2 (t), 31.3 (t), 55.9 (d), 58.1 (d), 61.3 (t), 72.7 (t), 74.4 (d), 76.9 (d), 82.8 (d), 127.2 (d), 127.6 (d), 127.9 (d), 128.4 (d), 129.4 (d), 139.1 (s); IR (film NaCl plates) ( $\text{cm}^{-1}$ ) 3429, 3026, 2929, 1455, 1108; HRMS (ESI)  $m/z$  calcd for  $\text{C}_{19}\text{H}_{26}\text{O}_4\text{Na}$   $[\text{M}+\text{Na}]^+$ : 341.1729, found: 341.1724.

To a solution of major epoxide (100 mg, 0.31 mmol) in dry THF (3 mL) at  $0^\circ\text{C}$  under argon was added Red-Al® (0.15 ml of solution 60 % in toluene, 0.47 mmol). The reaction was warmed at room temperature and stirred for 3h. Then, the reaction mixture was quenched adding a drop of water. After gel formation, it was added  $\text{MgSO}_4$  and filtered over a pad of Celite and washed several times with  $\text{EtOAc}$ . The solvent was removed under reduced pressure and the crude obtained was purified by column chromatography with silica gel (hexane/ethyl acetate = 6/4) leading to the desired diol **19** (94 mg, 93 % yield) as a colorless oil:

$[\alpha]_D^{25} - 9.8$  ( $c$  1.0,  $\text{CHCl}_3$ );  $^1\text{H}$  NMR (400 MHz,  $\text{CDCl}_3$ )  $\delta$  0.97 (t,  $J = 7.4$ , 3H), 1.64 (m, 4H), 2.22 (m, 2H), 2.49 (m, 2H), 2.88 (br, 1H), 3.23 (br, 1H), 3.34 (dt,  $J = 7.1$ , 4.2 Hz, 1H), 3.82 (m, 3H), 4.05 (m, 1H), 4.27 (ddd,  $J = 10.4$ , 4.2, 1.4 Hz, 1H), 4.60 (m, 2H), 5.69 (m, 2H), 7.31 (m, 5H);  $^{13}\text{C}$  NMR (100 MHz,  $\text{CDCl}_3$ )  $\delta$  10.1 (q), 23.2 (t), 28.3 (t), 30.6 (t), 33.9 (t), 61.6 (t), 72.6 (t), 74.5 (d), 76.5 (d), 78.5 (d), 83.2 (d), 127.8 (d), 128.0 (d), 128.1 (d), 128.5 (d), 128.9 (d), 138.6 (s); IR (film NaCl plates) ( $\text{cm}^{-1}$ ) 3393, 3025, 2930, 1455, 1066; HRMS (ESI)  $m/z$  calcd for  $\text{C}_{19}\text{H}_{28}\text{O}_4\text{Na}$   $[\text{M}+\text{Na}]^+$ : 343.1885, found: 343.1884.

**Preparation of the (R)-4-((2S,7R)-7-((S)-1-((tert-Butyldimethylsilyl)oxy)propyl)-2,3,6,7-tetrahydrooxepin-2-yl)-4-hydroxybutanenitrile (3).**

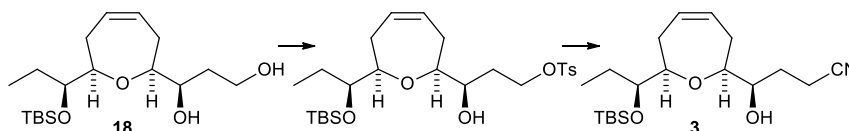

To a solution of diol **18** (37 mg, 0.11 mmol) in dry  $\text{CH}_2\text{Cl}_2$  (2 mL) at  $0^\circ\text{C}$  under argon atmosphere, it was added triethylamine (22  $\mu\text{L}$ , 0.16 mmol), DMAP (cat.) and *p*-TsCl (26 mg, 0.13 mmol). The reaction mixture was warmed to room temperature and stirred for 5 h. After this time, the reaction was quenched by addition of saturated aqueous  $\text{NaHCO}_3$  solution and the mixture was diluted with  $\text{CH}_2\text{Cl}_2$ . The phases were separated and the aqueous phase was extracted with  $\text{CH}_2\text{Cl}_2$  (3 x 10 mL). The organic layer was washed with brine, dried over  $\text{MgSO}_4$ , filtered, and concentrated. Purification by column chromatography with silica gel with 20 % EtAcO/Hexane afforded the tosylate (54 mg, quantitative).

To a solution of the compound obtained before (54 mg, 0.11 mmol) in acetonitrile (0.55 mL) under argon, it was added NaI (17 mg, 0.11 mmol) and NaCN (33 mg, 0.66 mmol). The reaction mixture was stirred and refluxed until TLC showed complete conversion (ca. 36 h), then poured into water (5 mL) and extracted with EtOAc (2 x 10 mL). The combined organic extracts were washed with water (2 x 5 mL) and brine, dried over  $\text{MgSO}_4$ , and concentrated under reduced pressure. Purification of the residue by flash column chromatography (hexane/ethyl acetate = 4/1) afforded nitrile **3** (30 mg, 80 % yield) as a colorless oil:  $[\alpha]_D^{25} - 4.1$  ( $c$  1.0,  $\text{CHCl}_3$ );  $^1\text{H}$  NMR (400 MHz,  $\text{CDCl}_3$ )  $\delta$  0.06 (d, 6H), 0.90 (s, 9H), 0.91 (t,  $J = 7.5$  Hz, 3H), 1.54 (m, 3H), 1.81 (m, 2H), 2.13 (m, 1H), 2.27 (m, 3H), 2.53 (m, 2H), 3.32 (m, 1H), 3.43 (m, 1H), 3.55 (dt,  $J = 6.7$ , 4.1 Hz, 1H), 3.61 (dt,  $J = 9.9$ , 3.3 Hz, 1H), 5.79 (m, 2H);  $^{13}\text{C}$  NMR (100 MHz,  $\text{CDCl}_3$ )  $\delta$  -4.3 (q), -4.1 (q), 9.8 (q), 14.0 (t), 18.3 (s), 25.9 (t), 26.1 (q), 28.1 (t), 32.4 (t), 32.8 (t), 72.4 (d), 76.4 (d), 82.3 (d), 83.2 (d), 120.0 (s), 128.7 (d), 130.1 (d); IR (film NaCl plates) ( $\text{cm}^{-1}$ ) 3487, 3022, 2930, 2857, 1254, 1110; HRMS (ESI)  $m/z$  calcd for  $\text{C}_{19}\text{H}_{35}\text{NO}_3\text{SiNa}$   $[\text{M}+\text{Na}]^+$ : 376.2284, found: 376.2275.

**Preparation of the (S)-1-((2R,7R)-7-((S)-1-(Benzyloxy)propyl)-2,3,6,7-tetrahydrooxepin-2-yl)-3-((tert-butyldimethylsilyl)oxy)propan-1-ol (4).**

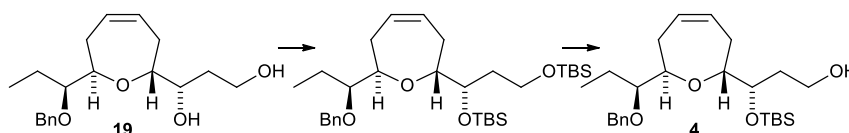

To a solution of diol **19** (50 mg, 0.16 mmol) in  $\text{CH}_2\text{Cl}_2$  (1.6 mL) at room temperature under argon atmosphere was added Imidazole (22 mg, 0.32 mmol), triethylamine (0.13 mL, 0.96 mmol) and TBSOTf (0.12 mL, 0.48 mmol). The reaction mixture was stirred and refluxed until TLC showed complete conversion (ca. 18 h), then poured into a 5 mL of water and extracted with  $\text{CH}_2\text{Cl}_2$  (2 x 10 mL). The combined organic extracts were dried over  $\text{MgSO}_4$  and concentrated to yield the crude bis-silyl ethers as an oil, which was used without further purification.

To a solution of above crude oil in a mixture tetrahydrofuran-water 1:1 (0.8 mL/0.8mL) at 0°C, it was added trifluoroacetic acid (15  $\mu$ L, 0.19 mmol). The reaction was monitored by TLC until complete conversion was observed. Then, the reaction was quenched with by addition of saturated aqueous NaHCO<sub>3</sub> solution and the mixture was dilutes with Et<sub>2</sub>O. The phases were separated and the aqueous phase was extracted with Et<sub>2</sub>O (3 x 10 mL). The organic layer was dried over MgSO<sub>4</sub>, filtered, and concentrated. Purification by column chromatography with silica gel with 15 % EtAcO/Hexane afforded **4** (58 mg, 86 % yield after 2 steps) as a colorless oil:  $[\alpha]^{25}_{\text{D}} - 10.8$  (*c* 1.92, CH<sub>2</sub>Cl<sub>2</sub>); <sup>1</sup>H NMR (400 MHz, CDCl<sub>3</sub>)  $\delta$  0.09 (d, *J* = 4.5 Hz, 6H), 0.89 (s, 9H), 0.94 (t, *J* = 7.4, 3H), 1.59 (m, 2H), 1.77 (m, 1H), 1.90 (m, 1H), 2.38 (m, 5H), 3.37 (dt, *J* = 6.5, 4.5 Hz, 1H), 3.78 (m, 3H), 4.11 (m, 2H), 4.58 (d, *J* = 11.7 Hz, 1H), 4.64 (d, *J* = 11.7 Hz, 1H), 5.71 (m, 2H), 7.31 (m, 5H); <sup>13</sup>C NMR (100 MHz, CDCl<sub>3</sub>)  $\delta$  -4.3 (q), -4.2 (q), 10.0 (q), 18.2(s), 23.9 (t), 26.0 (q), 29.5 (t), 30.2 (t), 36.1 (t), 59.5 (t), 72.7 (t), 73.8 (d), 77.5 (d), 78.3 (d), 83.1 (d), 126.7 (d), 127.9 (d), 128.4(d), 128.8 (d), 129.2 (d), 139.1 (s); IR (film NaCl plates) (cm<sup>-1</sup>) 3426, 3024, 2931, 2858, 1253, 1104; HRMS (ESI) *m/z* calcd for C<sub>25</sub>H<sub>42</sub>O<sub>4</sub>SiNa [M+Na]<sup>+</sup>: 457.2750, found: 457.2758.

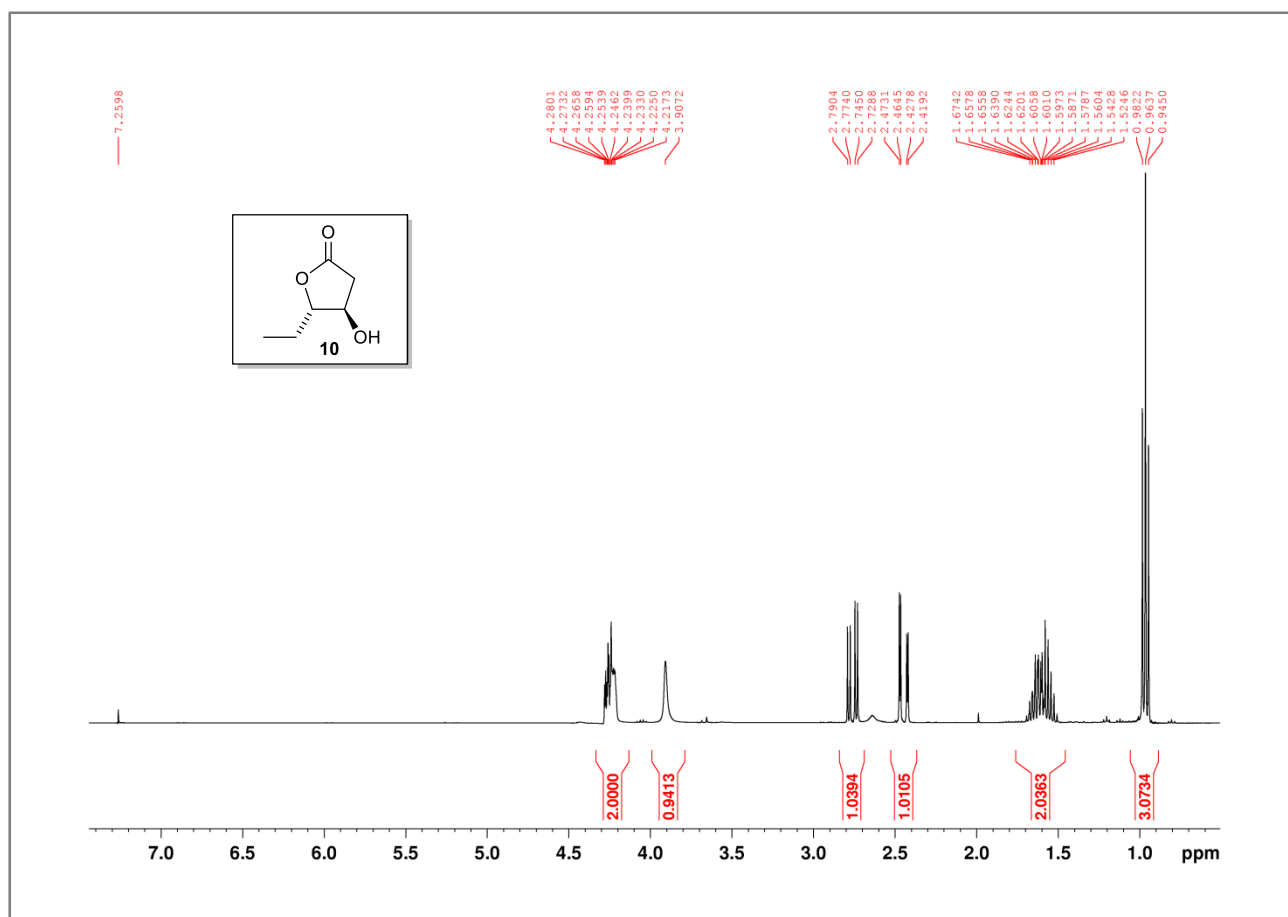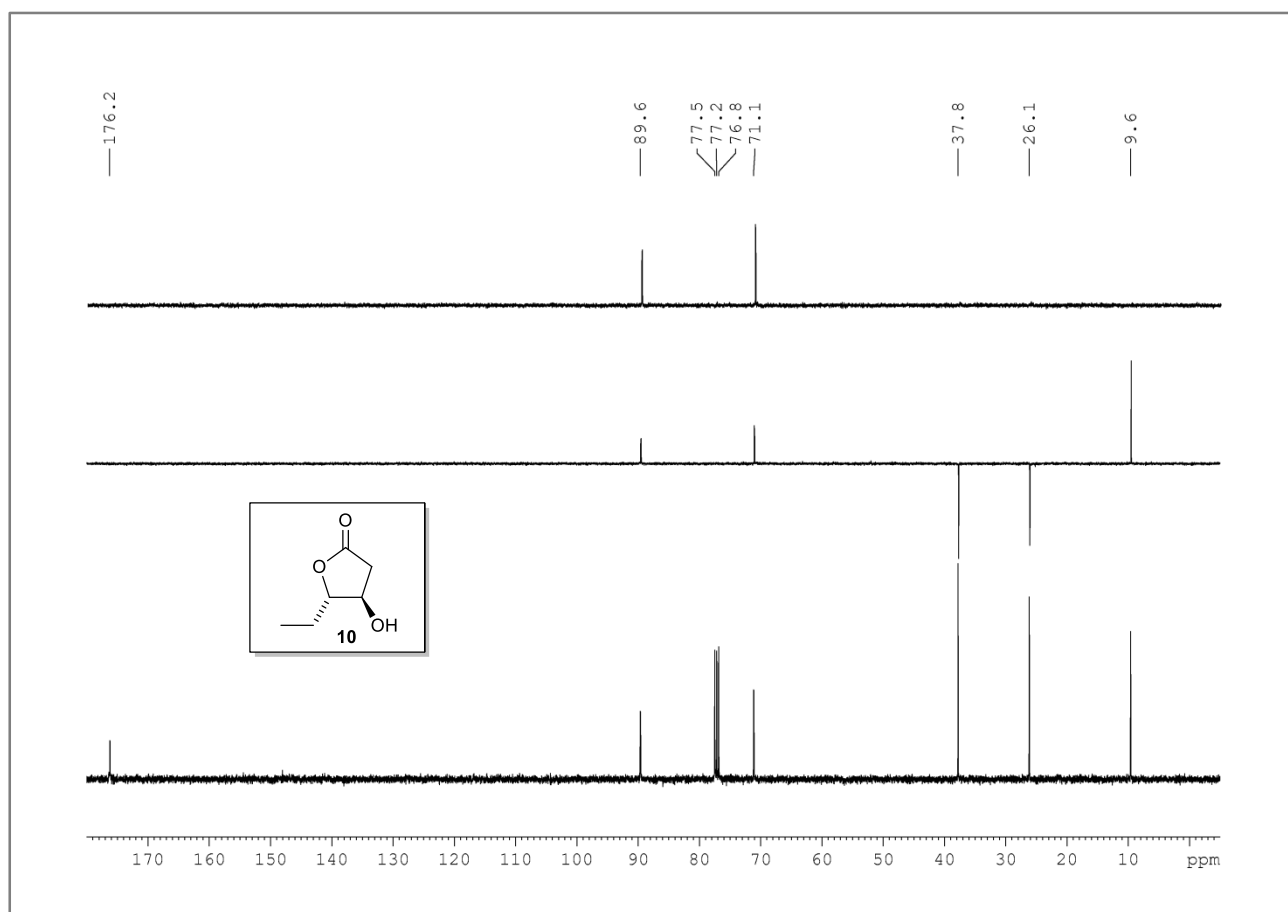

$^1\text{H}$  NMR spectra of (*S*)-Mosher's ester derivative from compound **10** in  $\text{CDCl}_3$

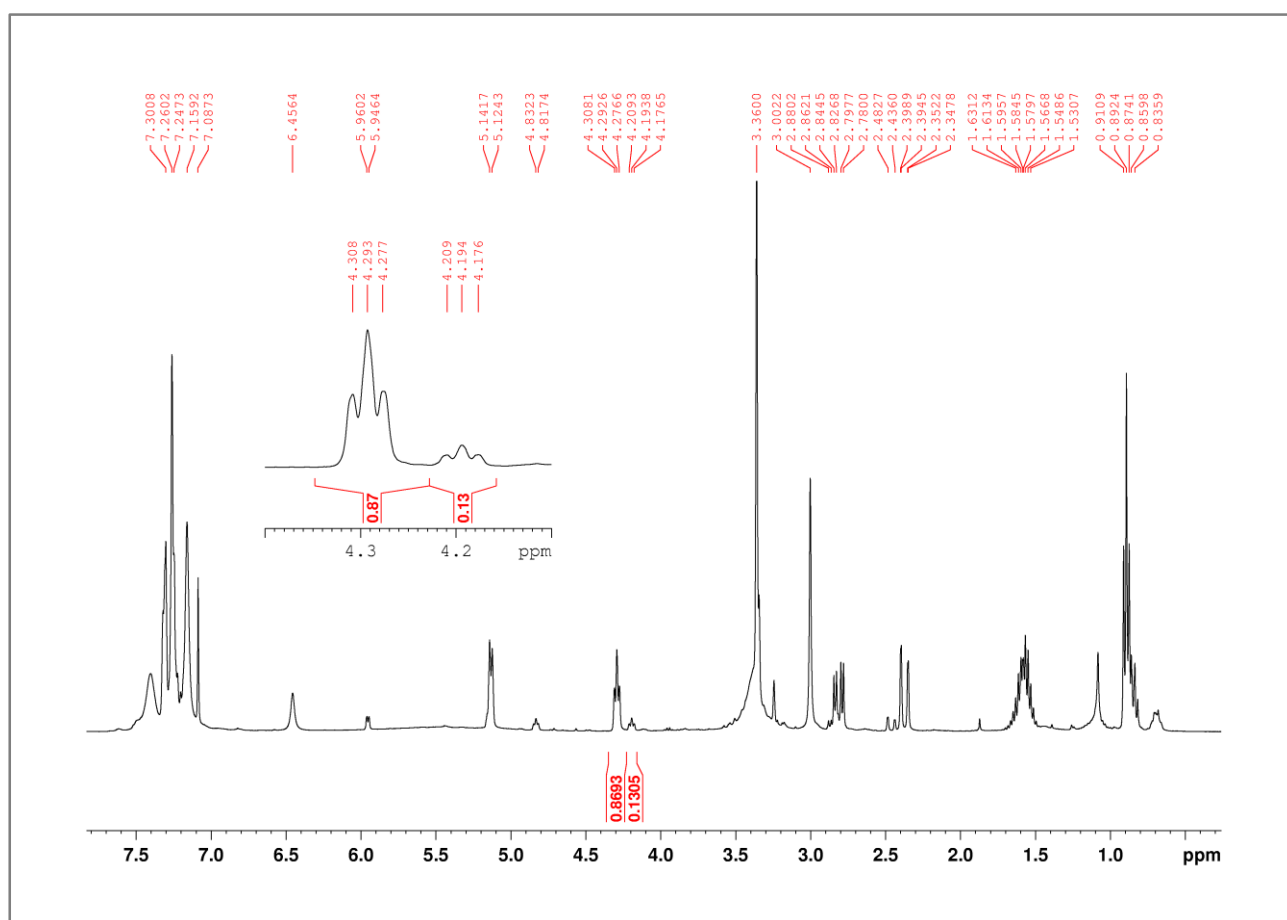

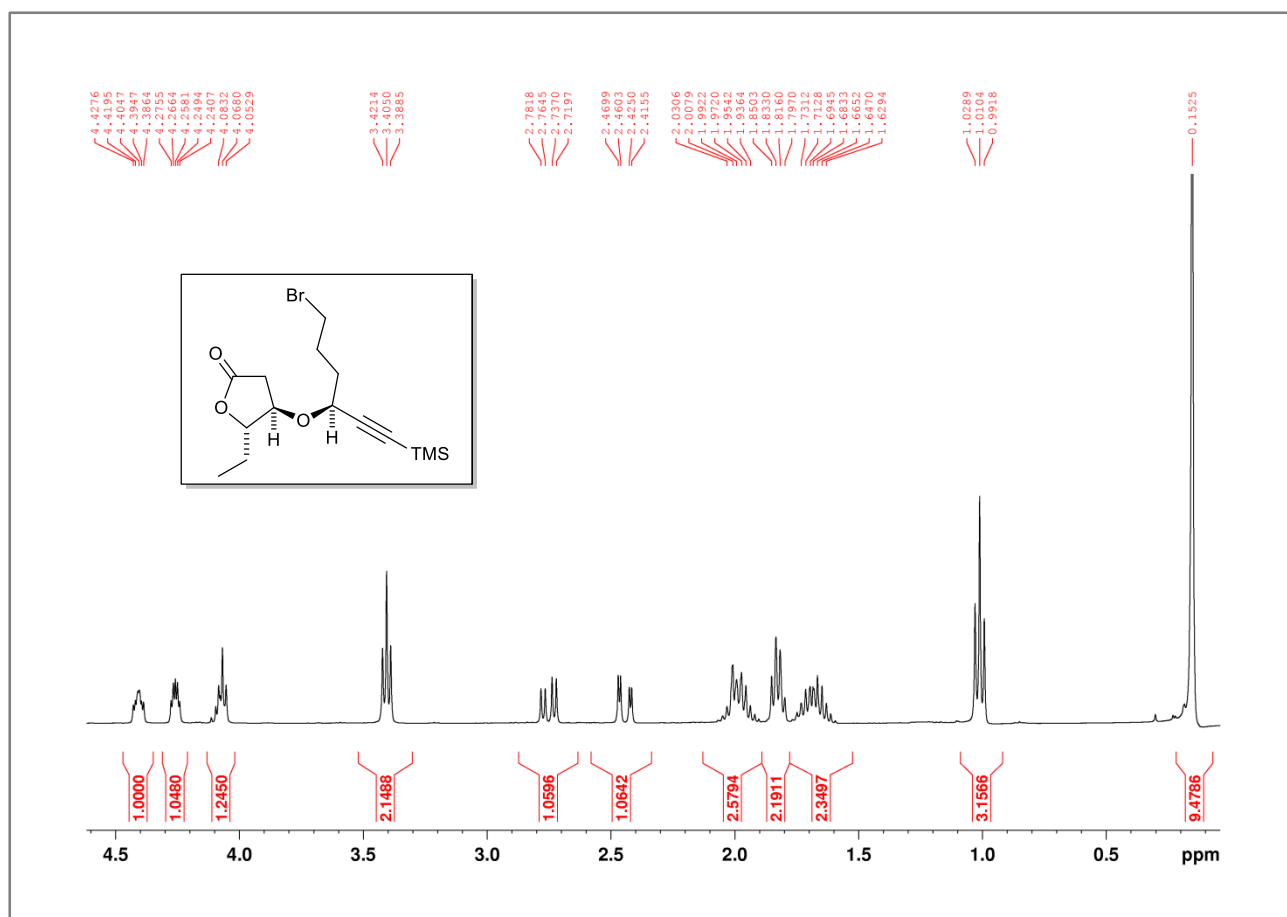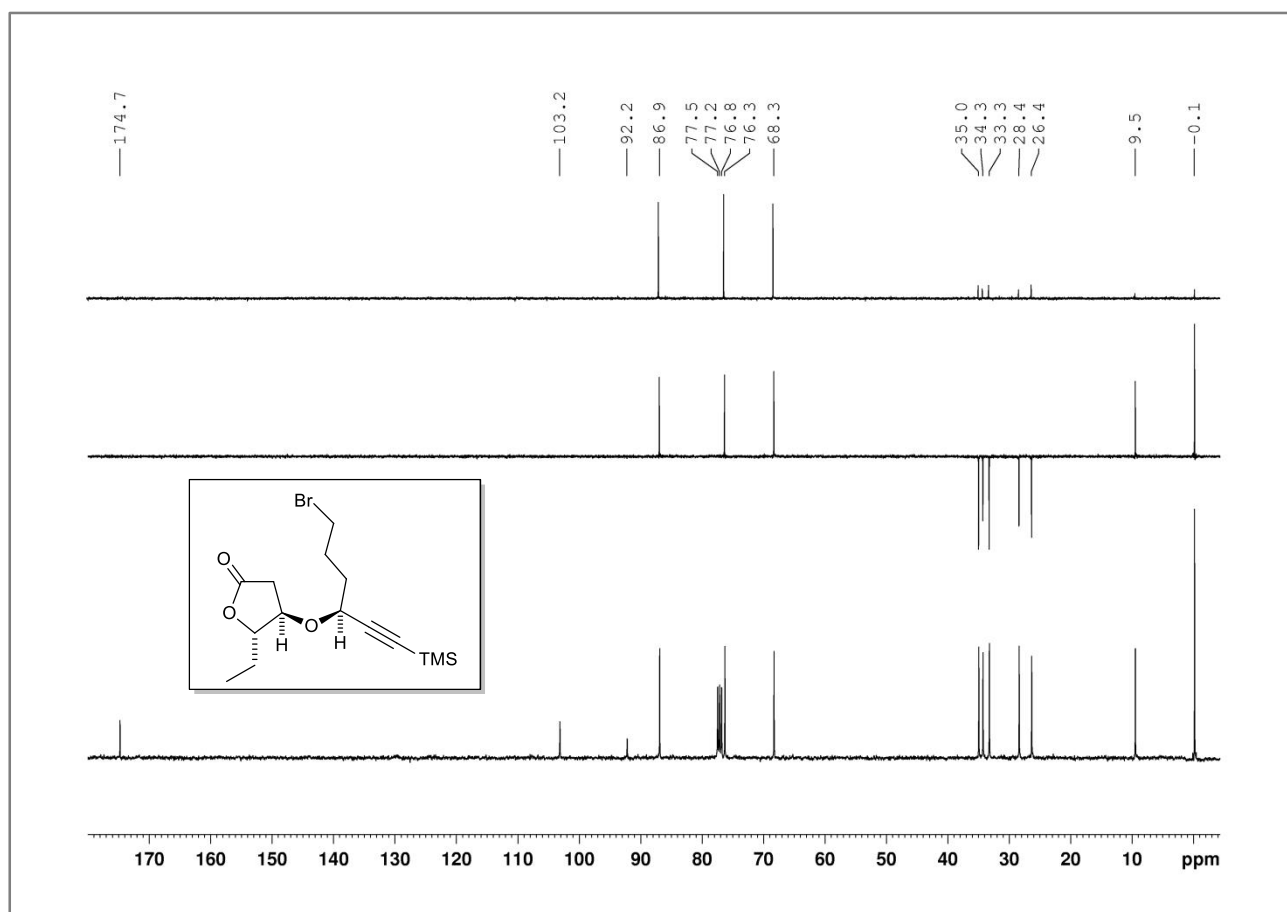

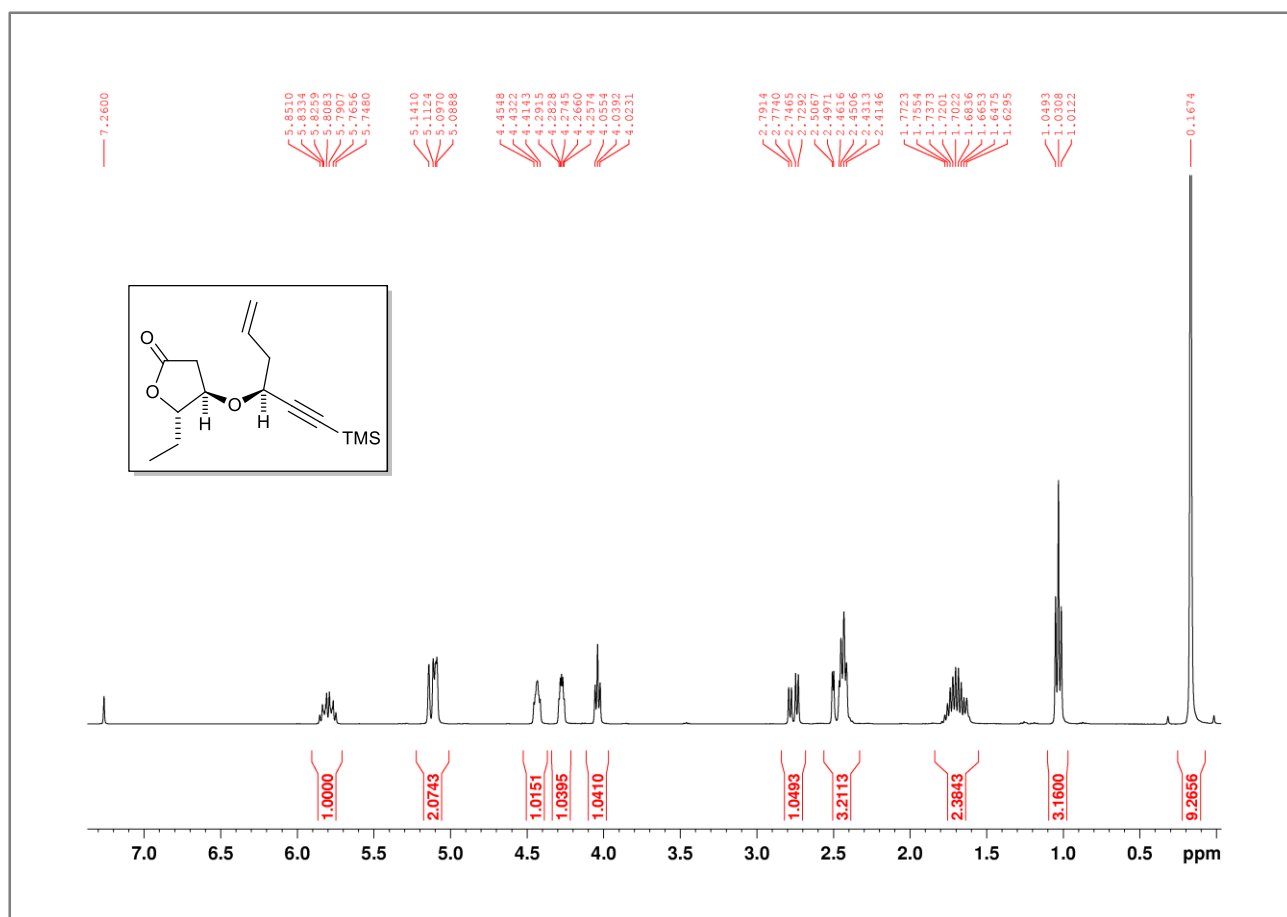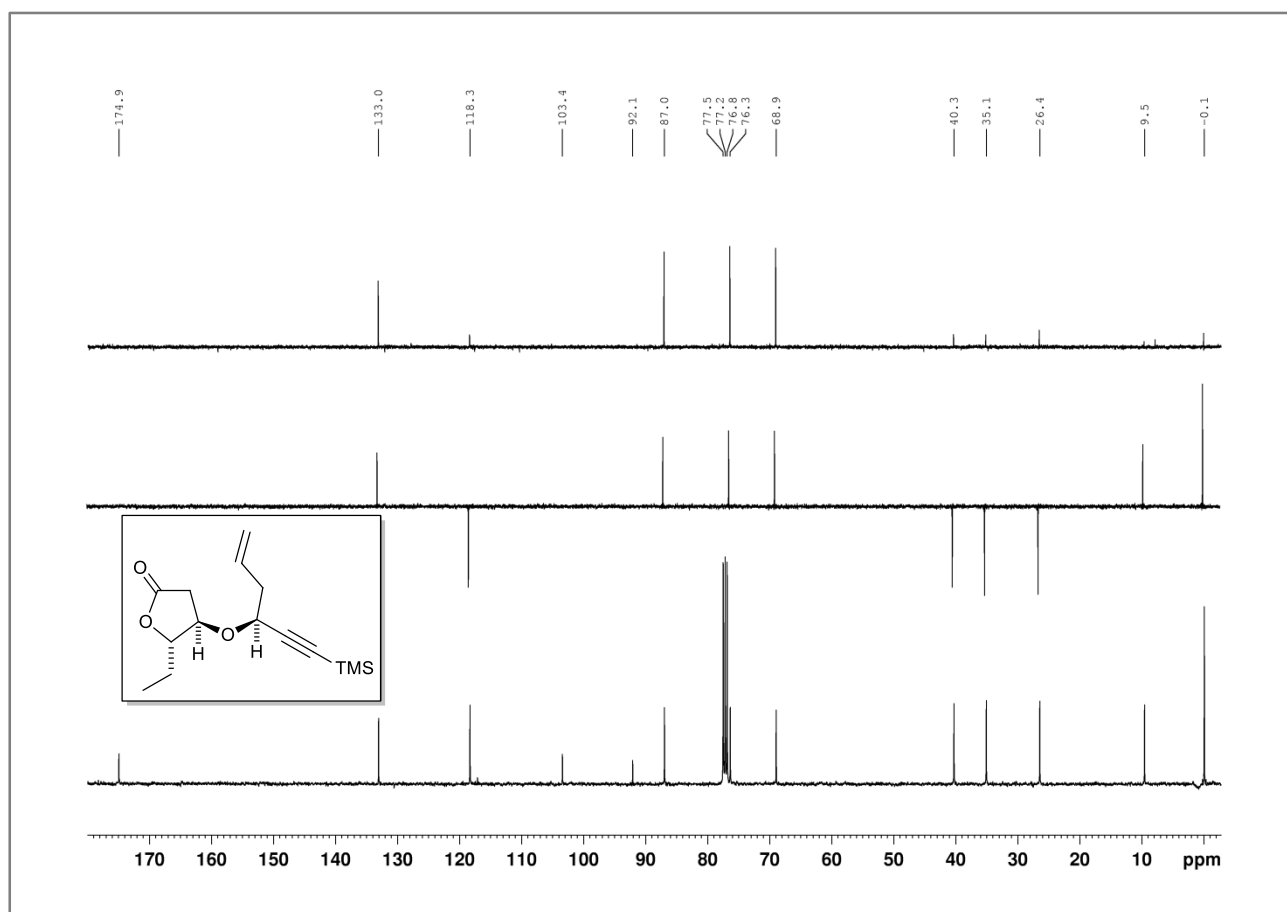

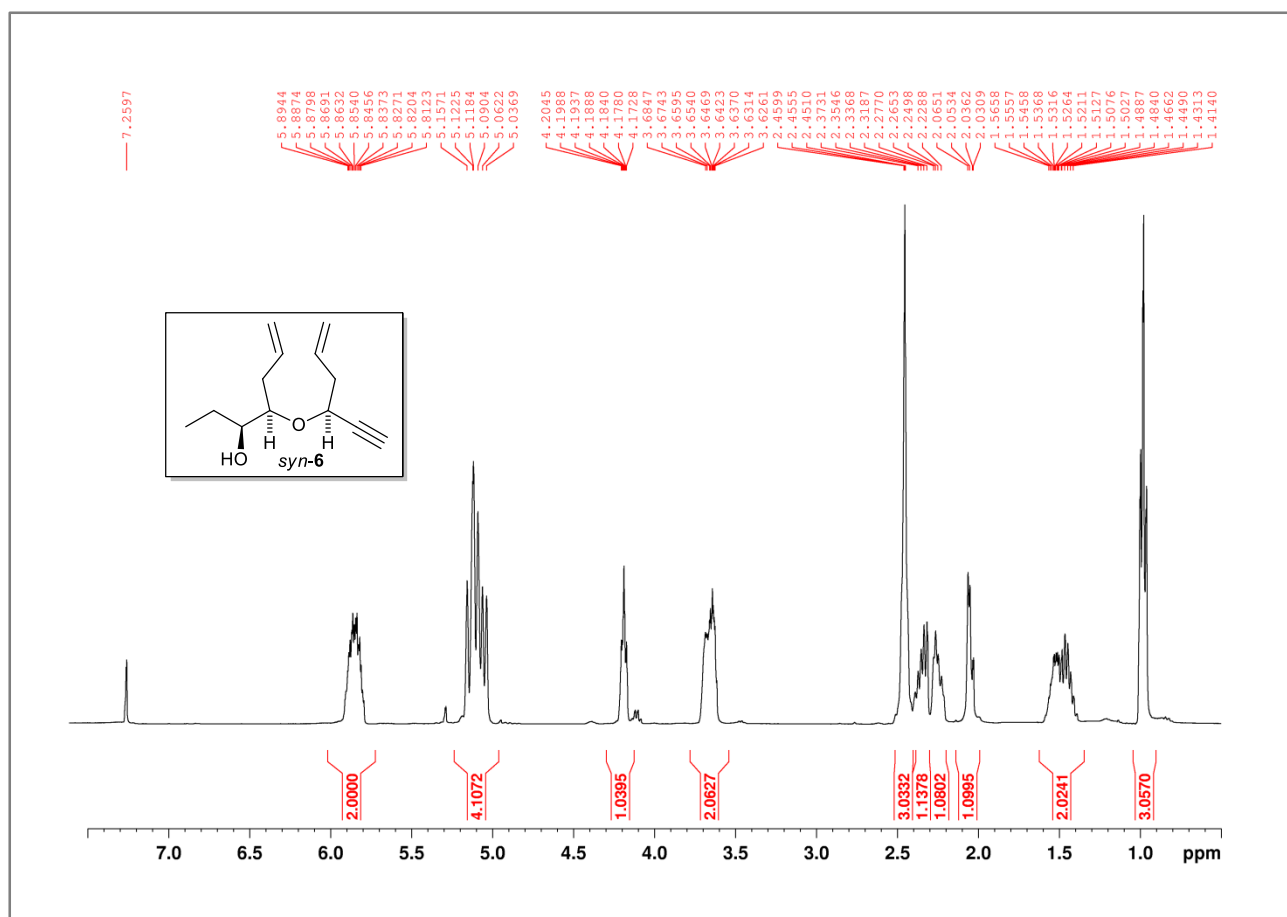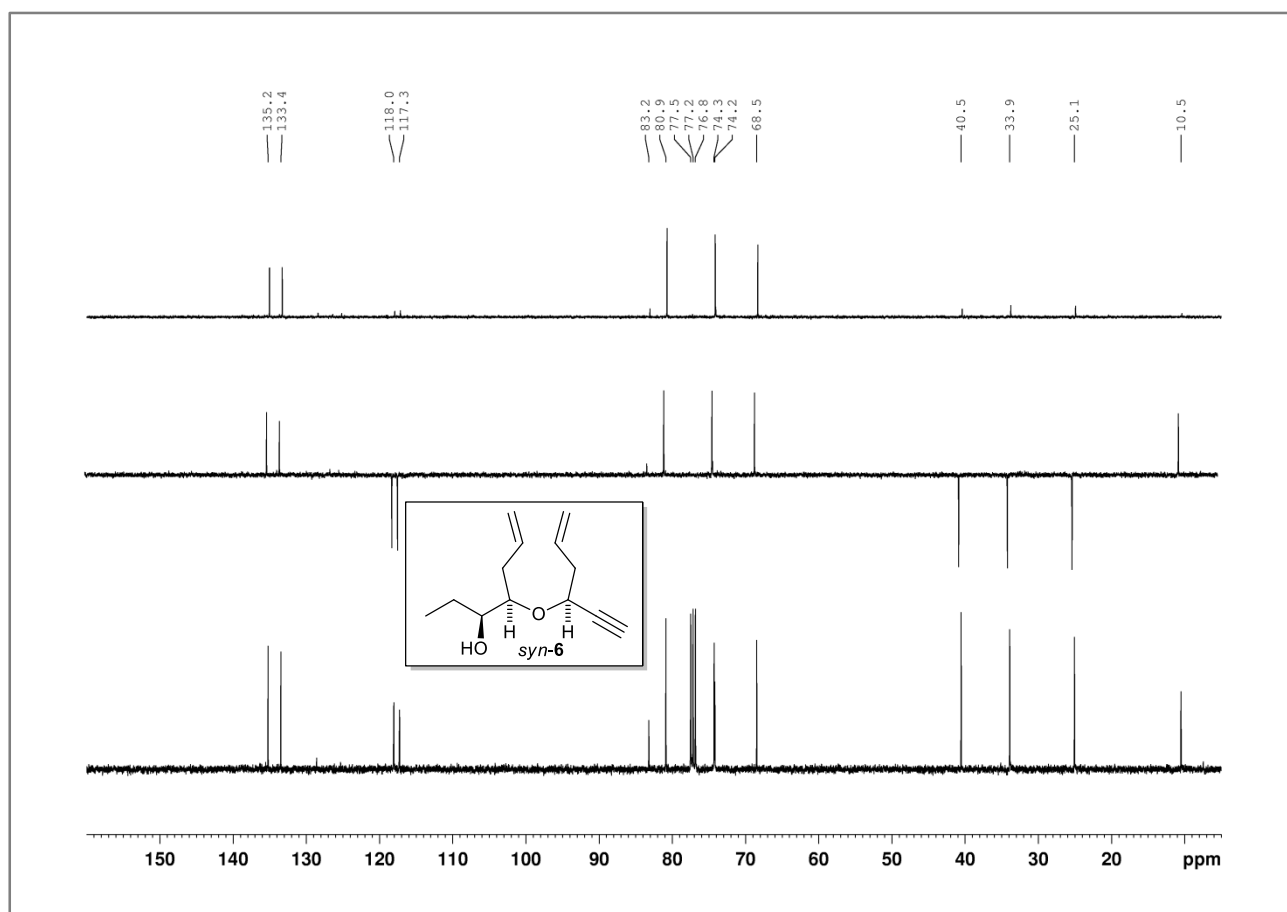

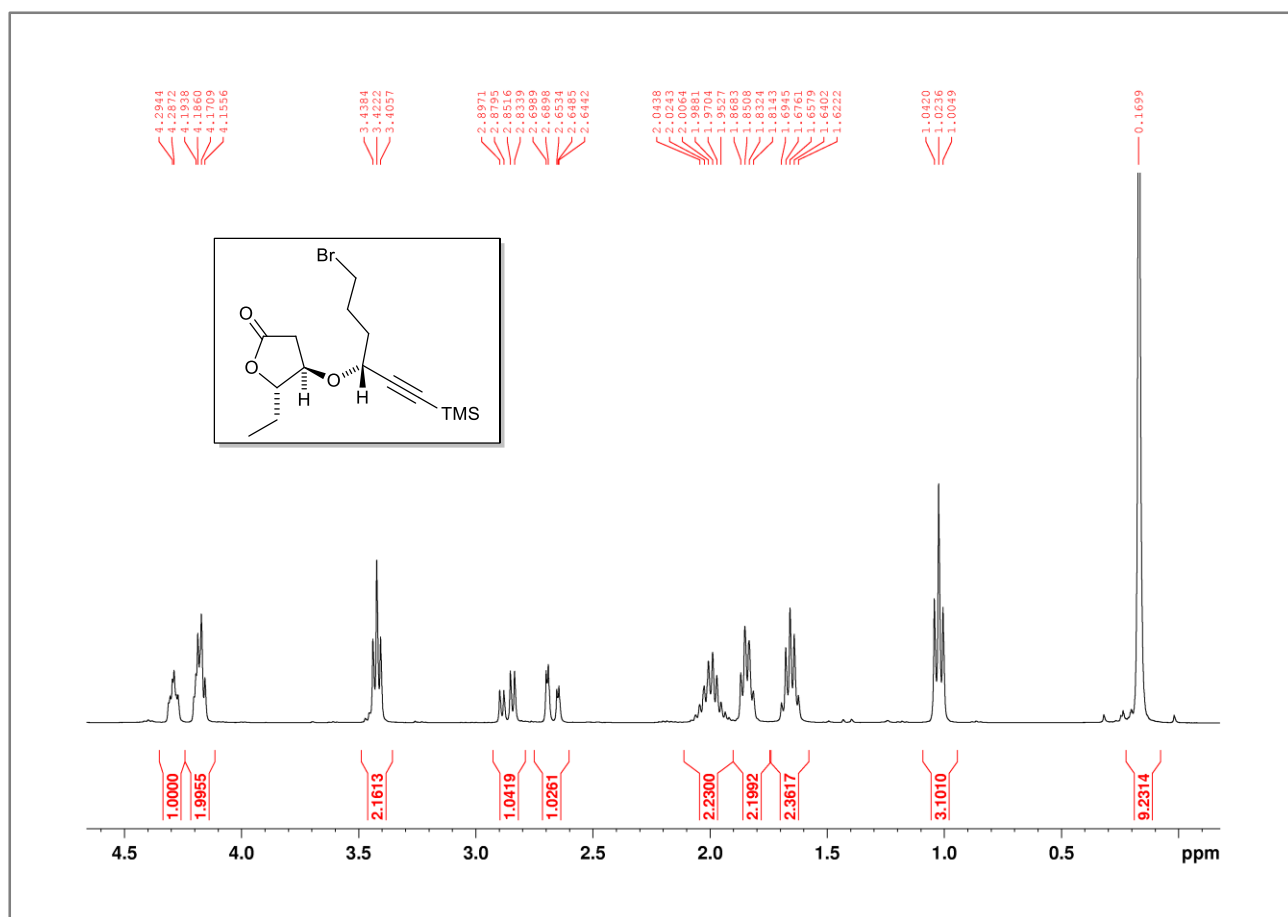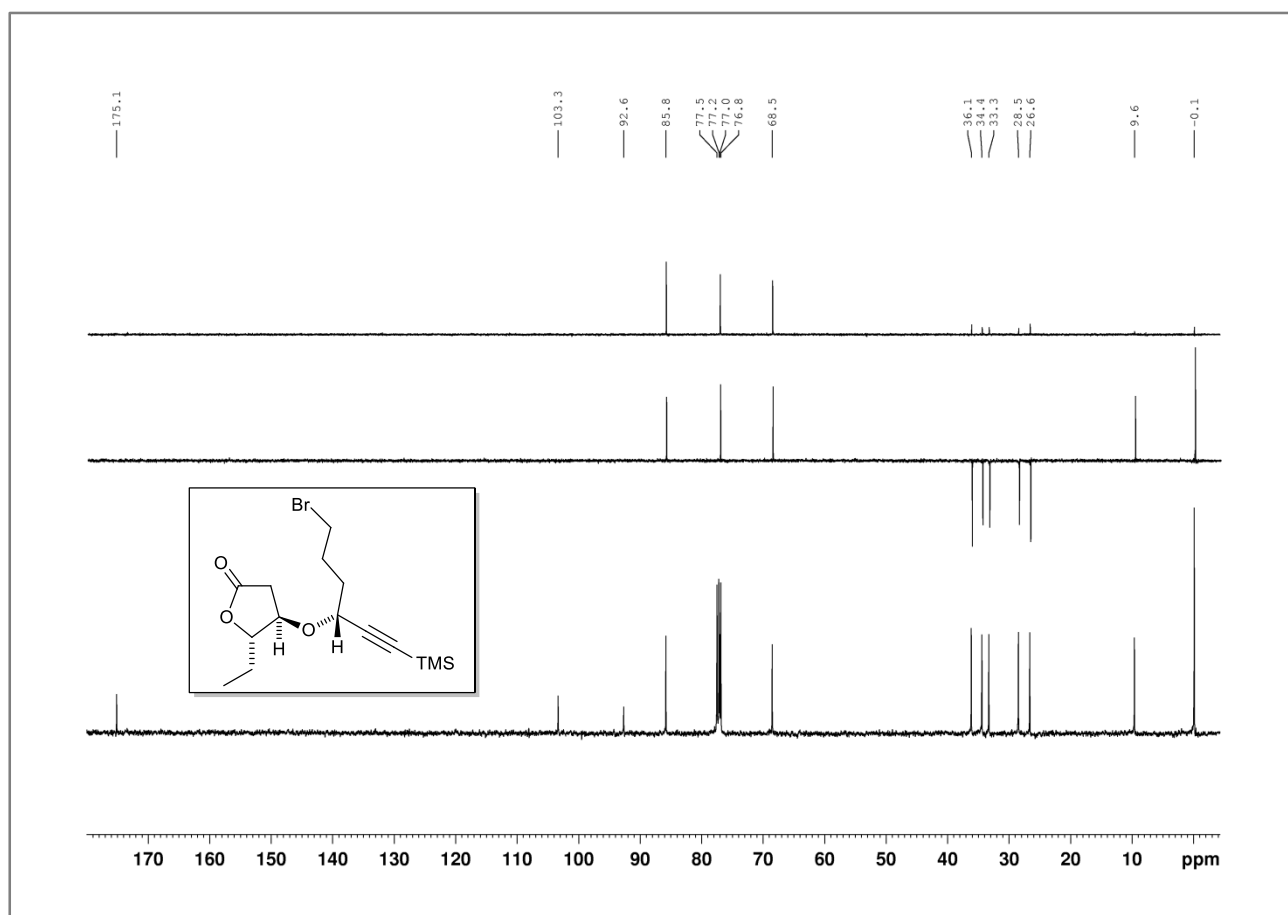

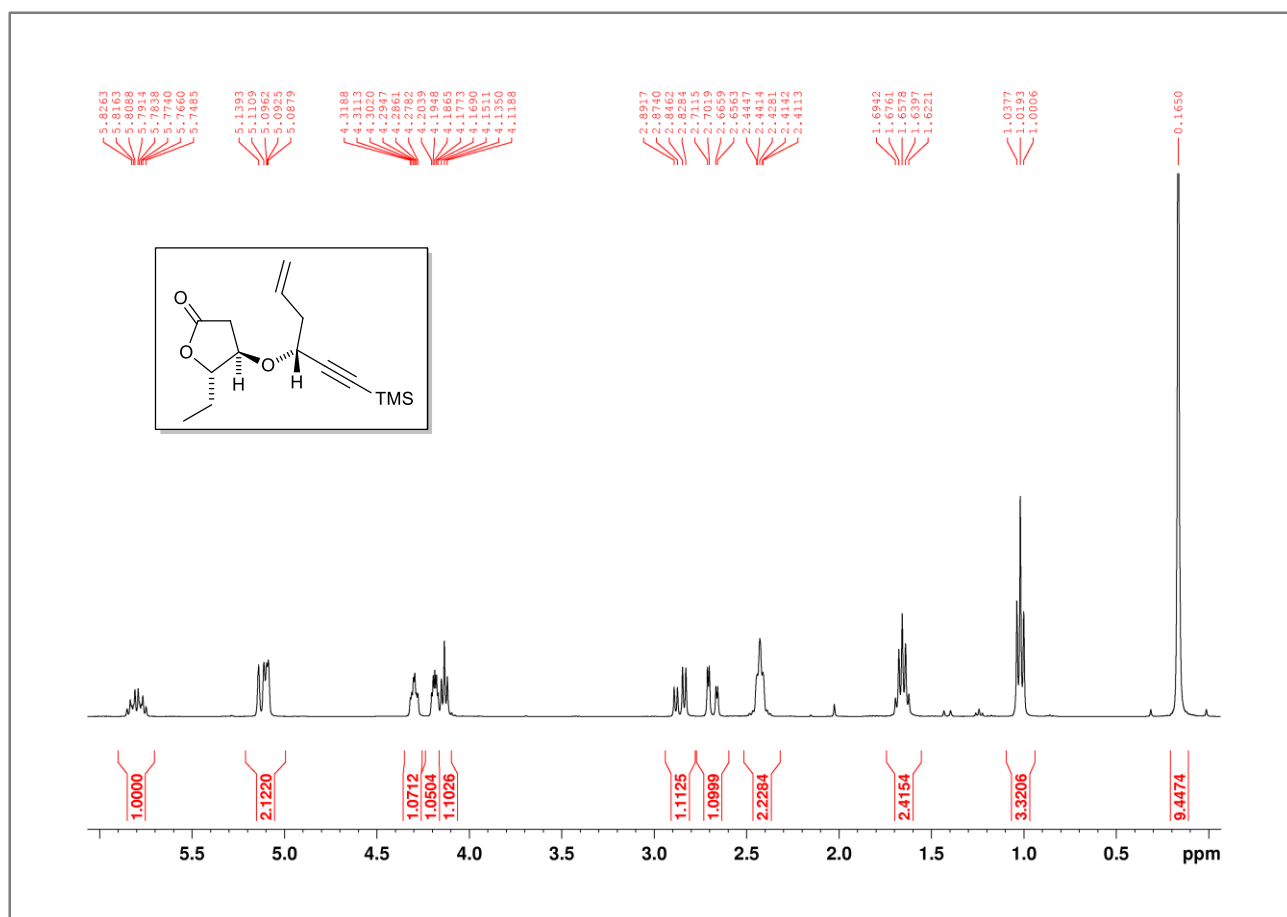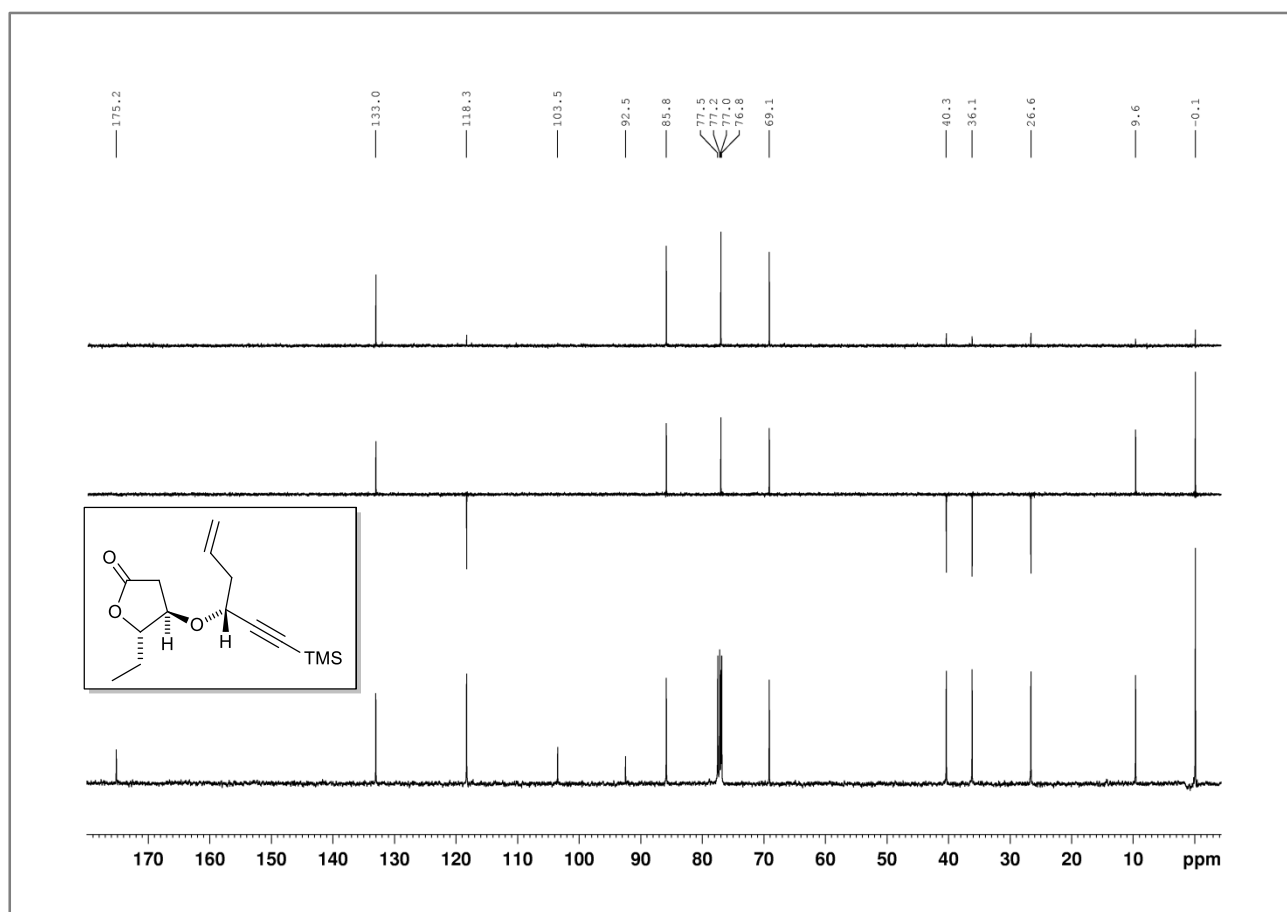

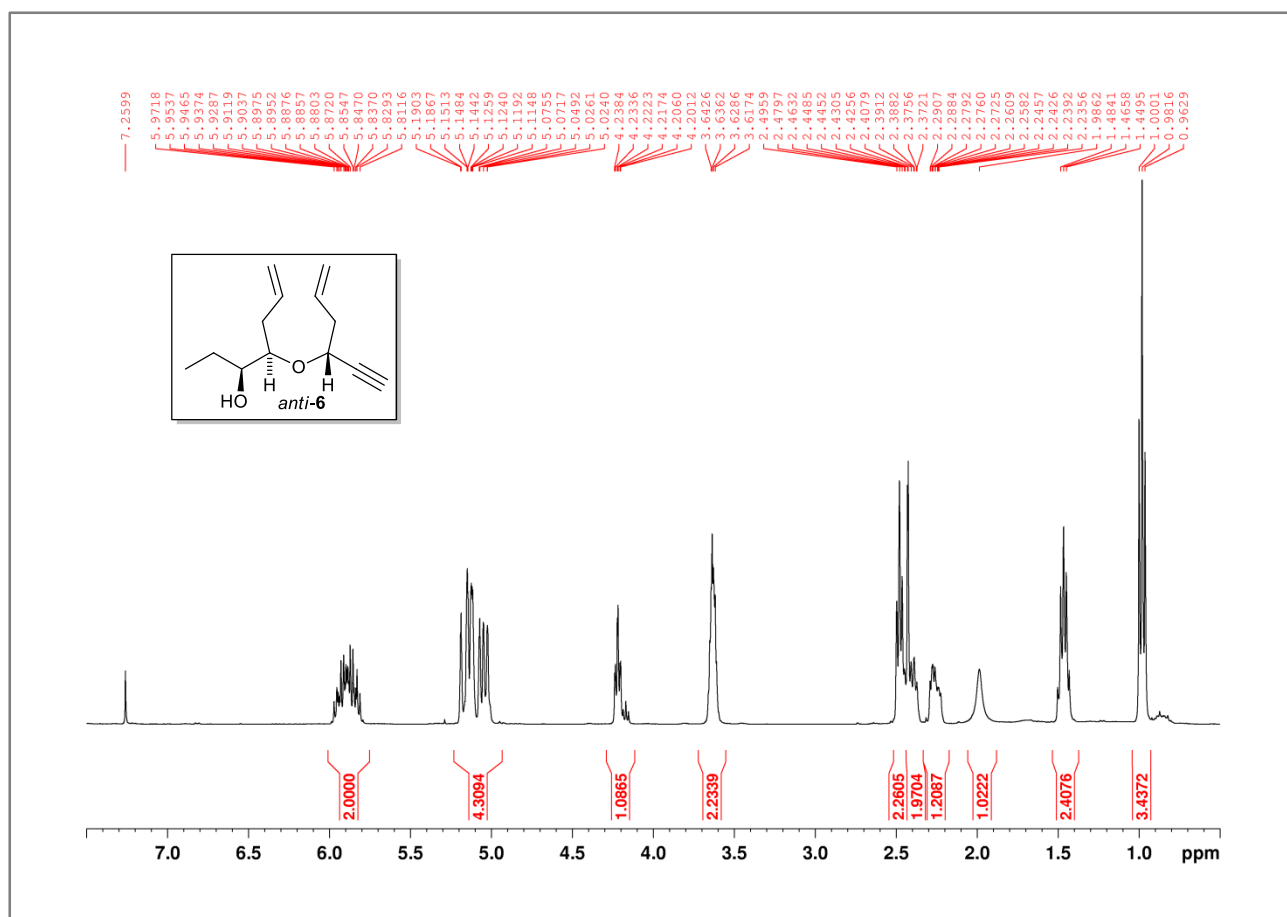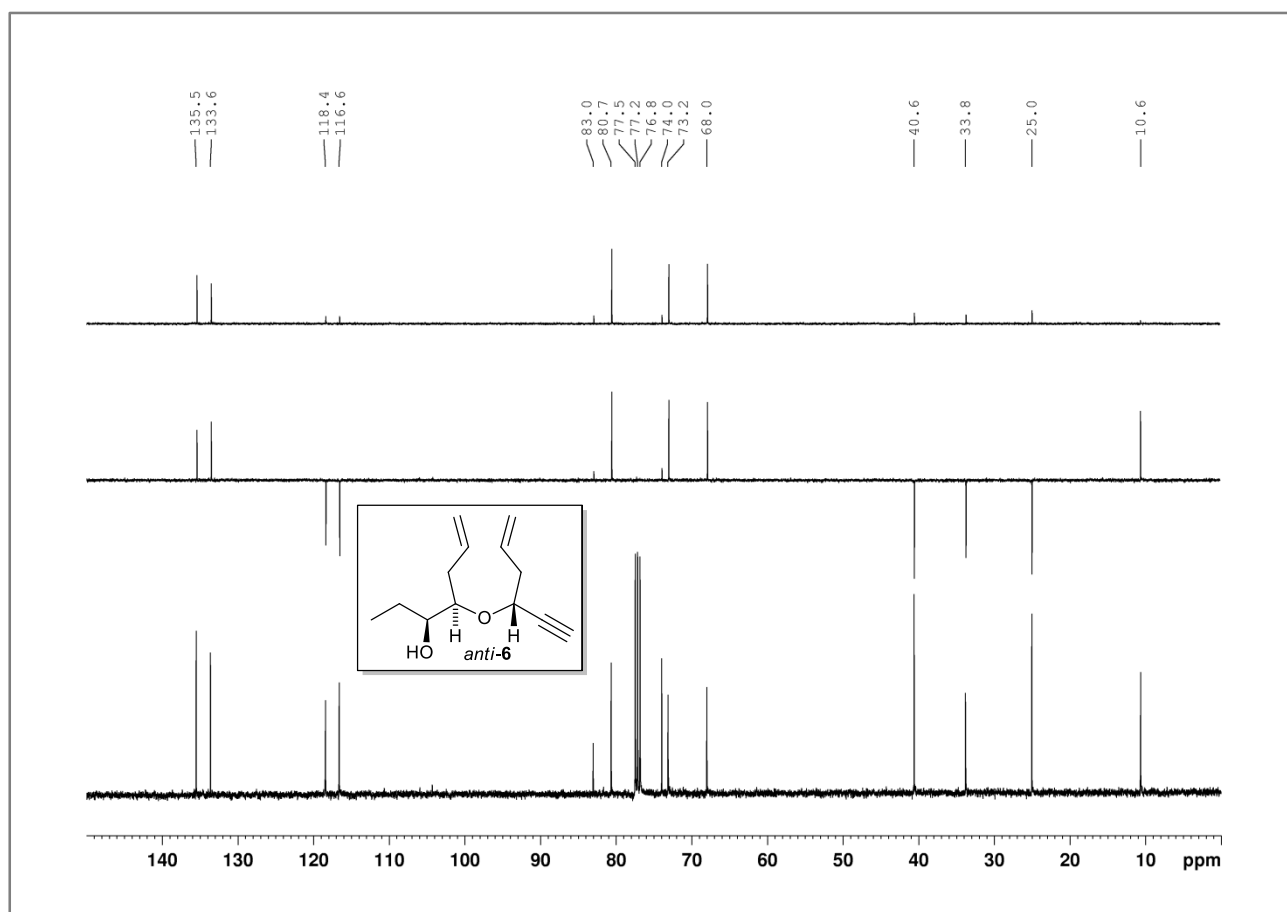

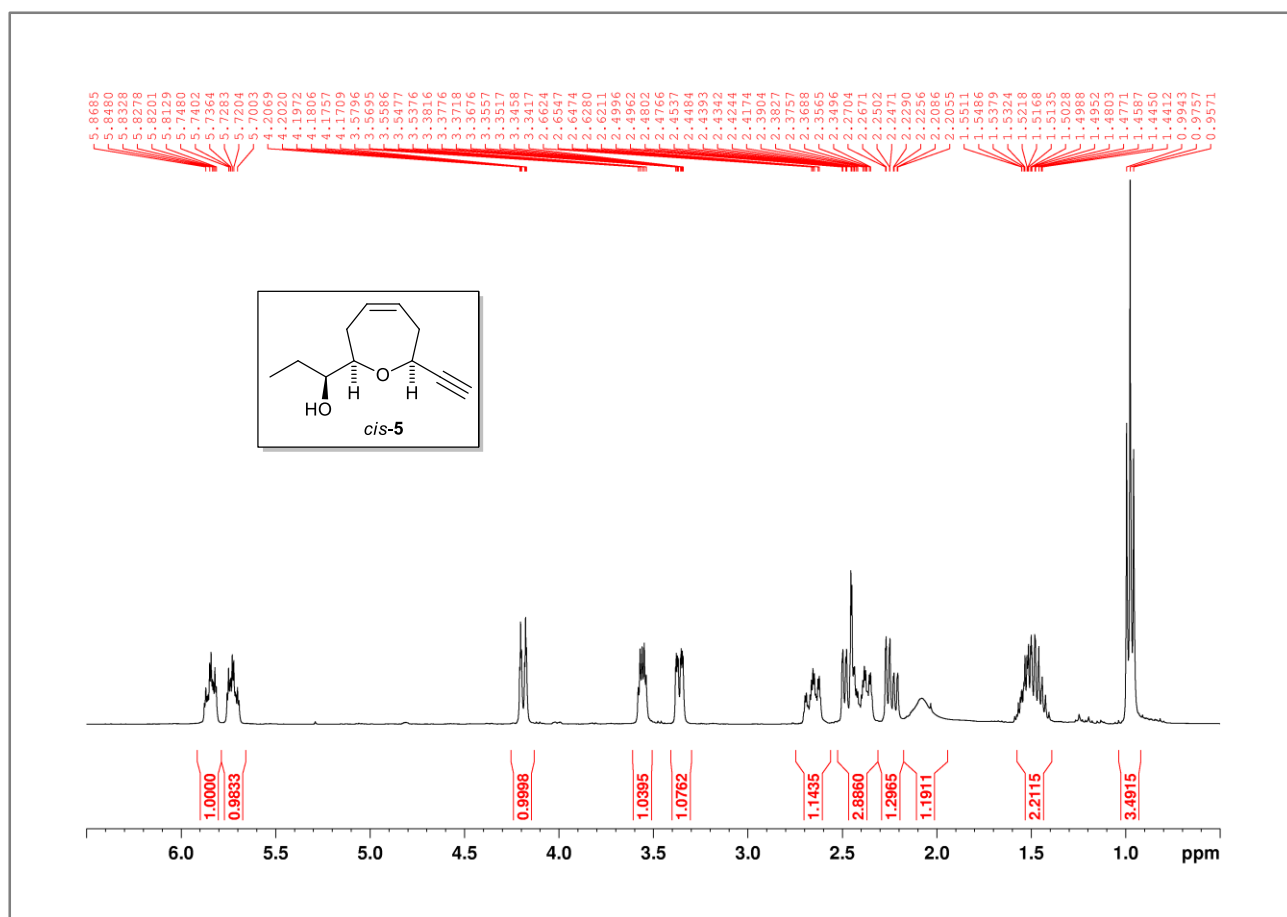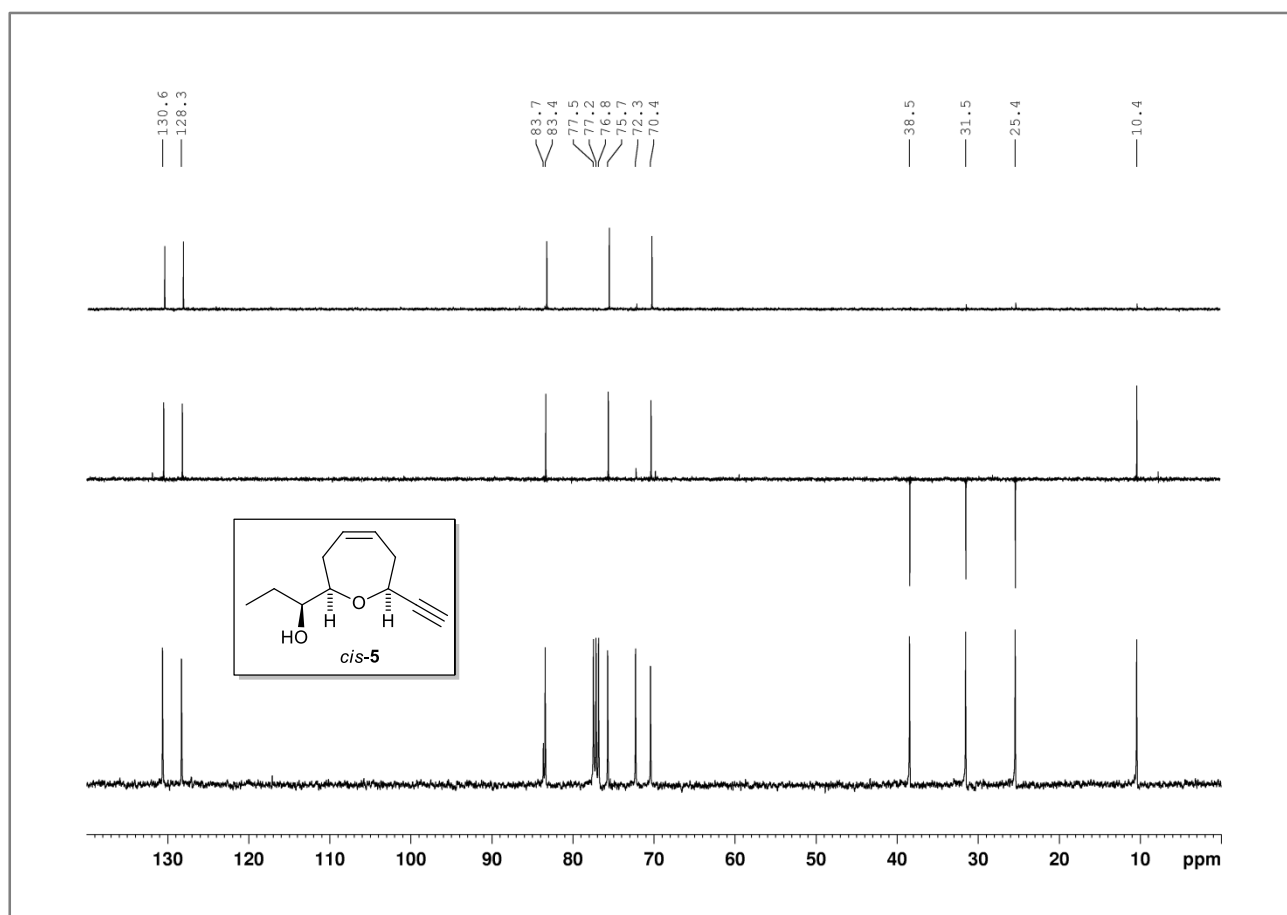

COSY and NOESY spectra of *cis*-5 in CDCl<sub>3</sub>

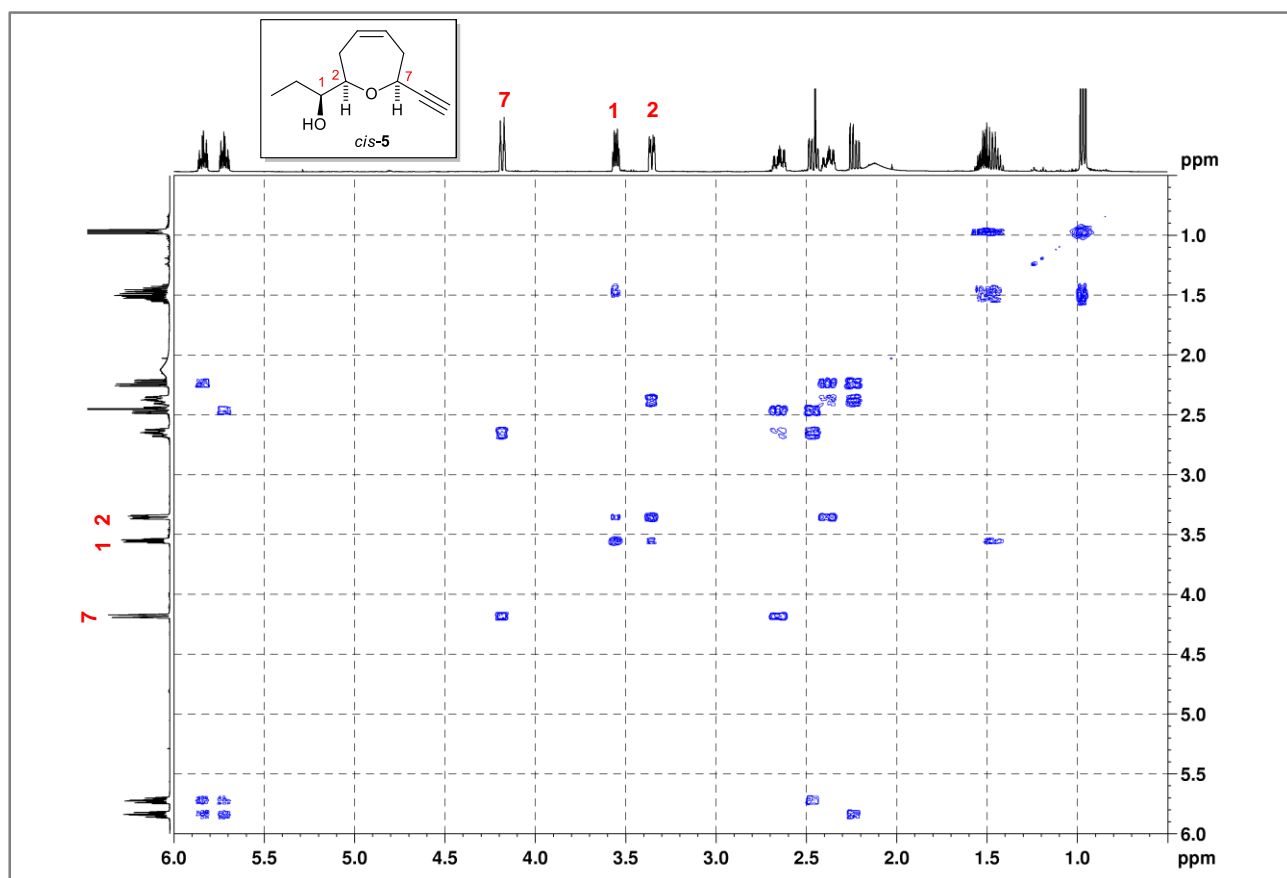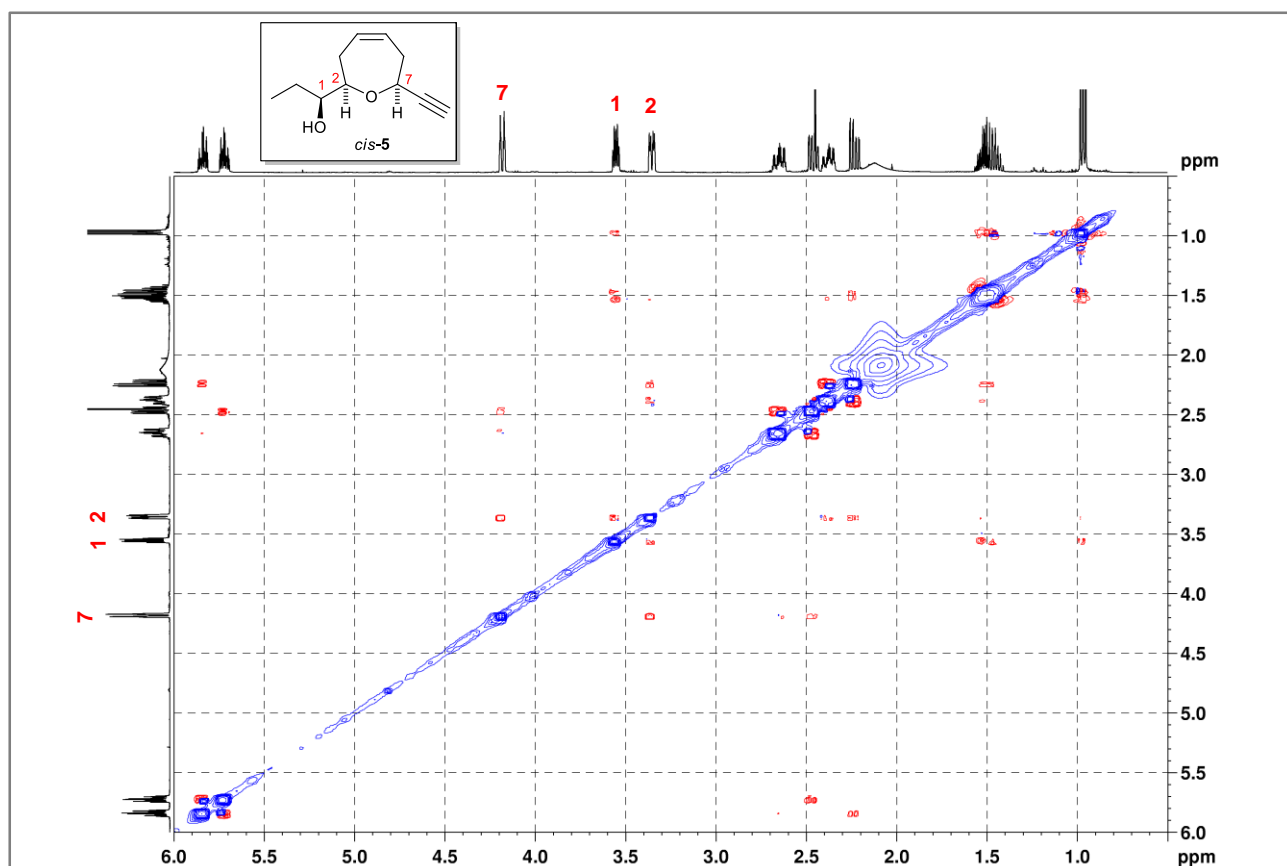

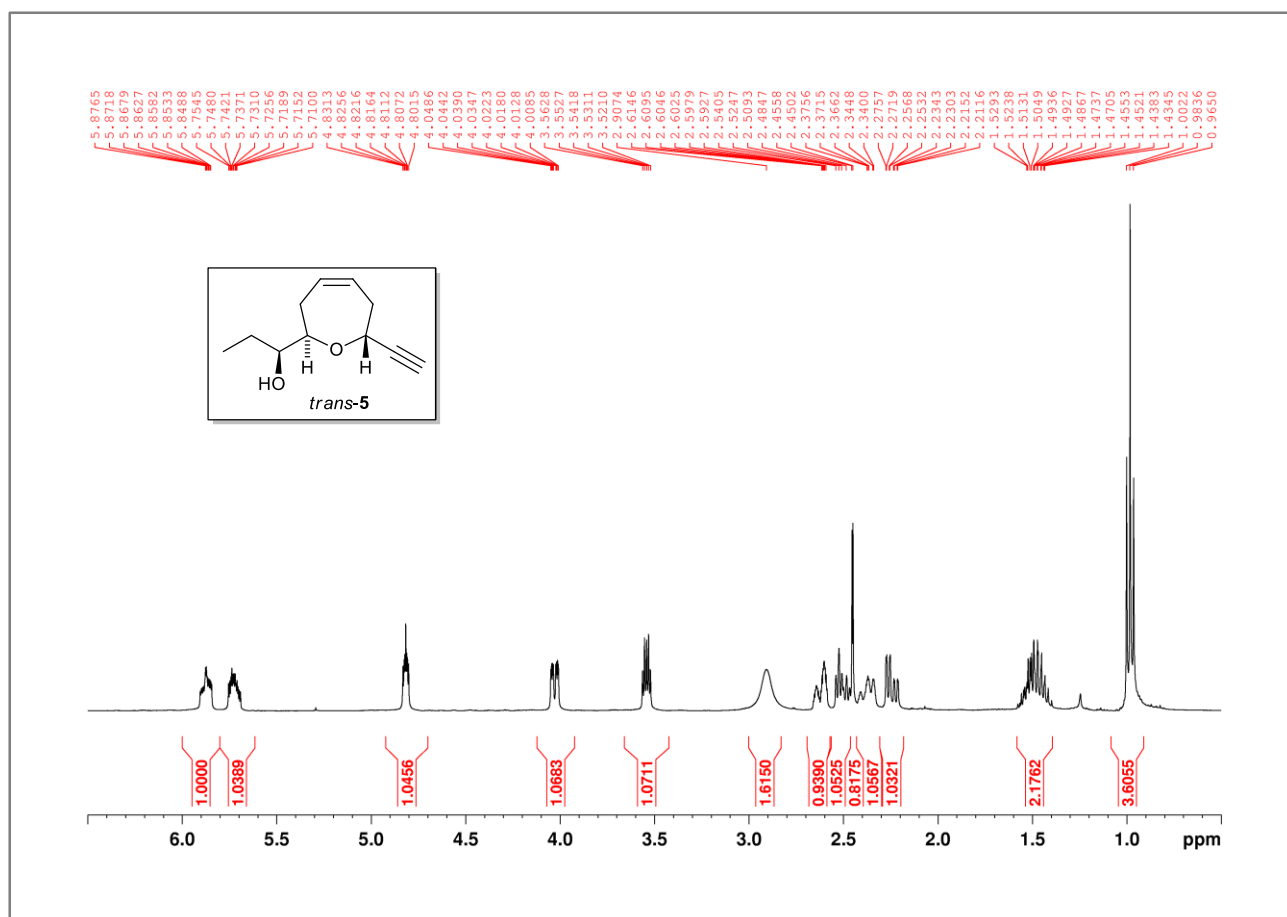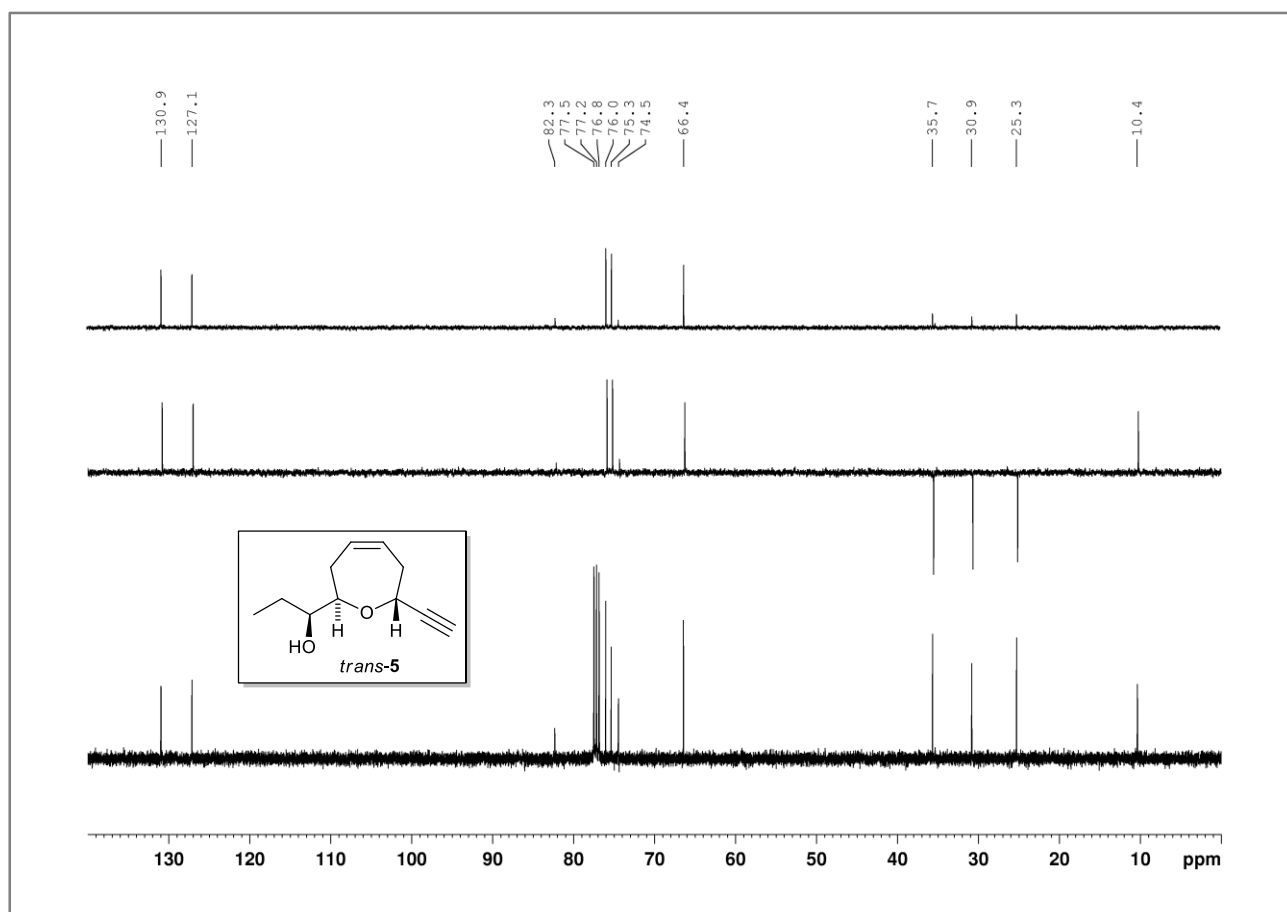

NOESY spectra of *trans*-**5** in CDCl<sub>3</sub>

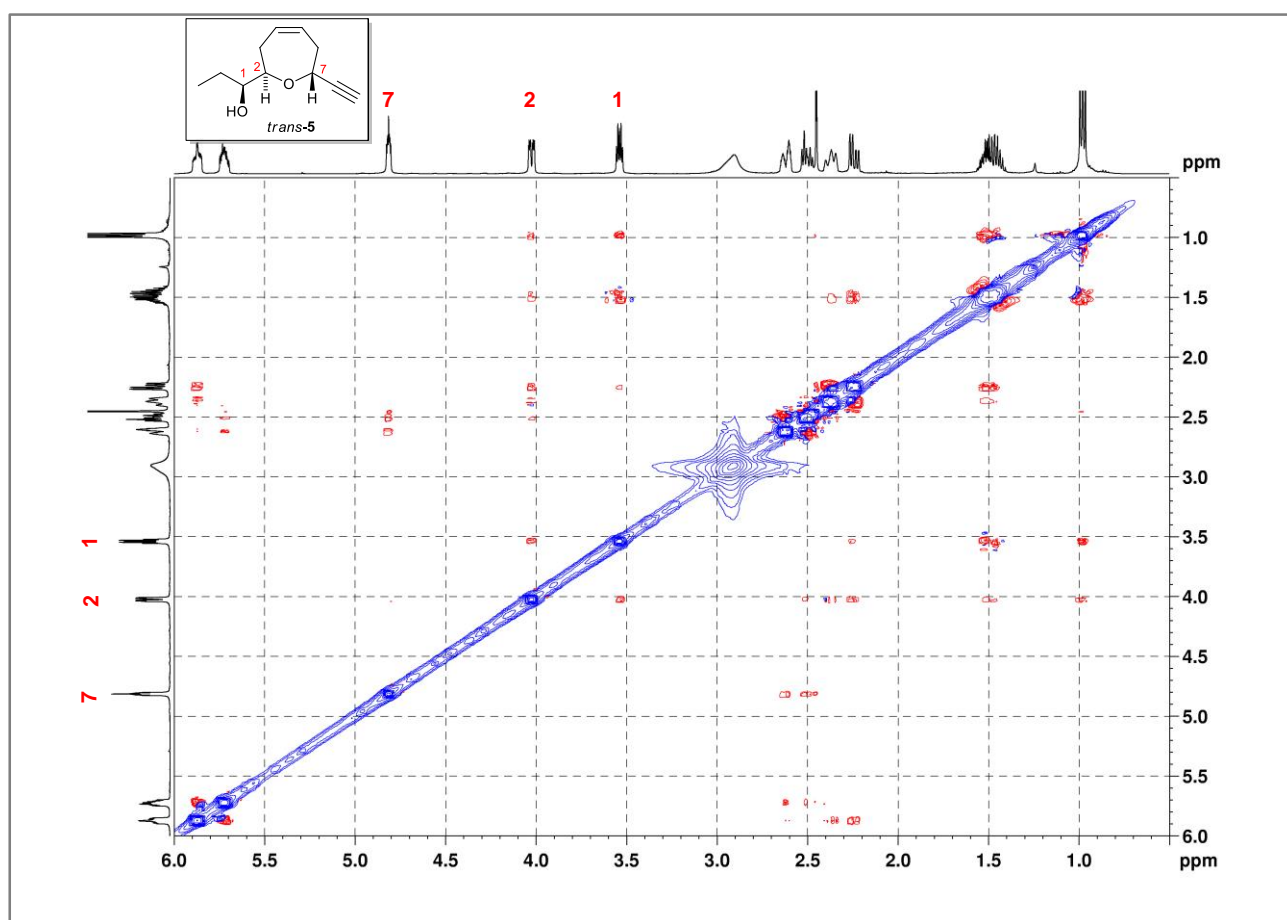

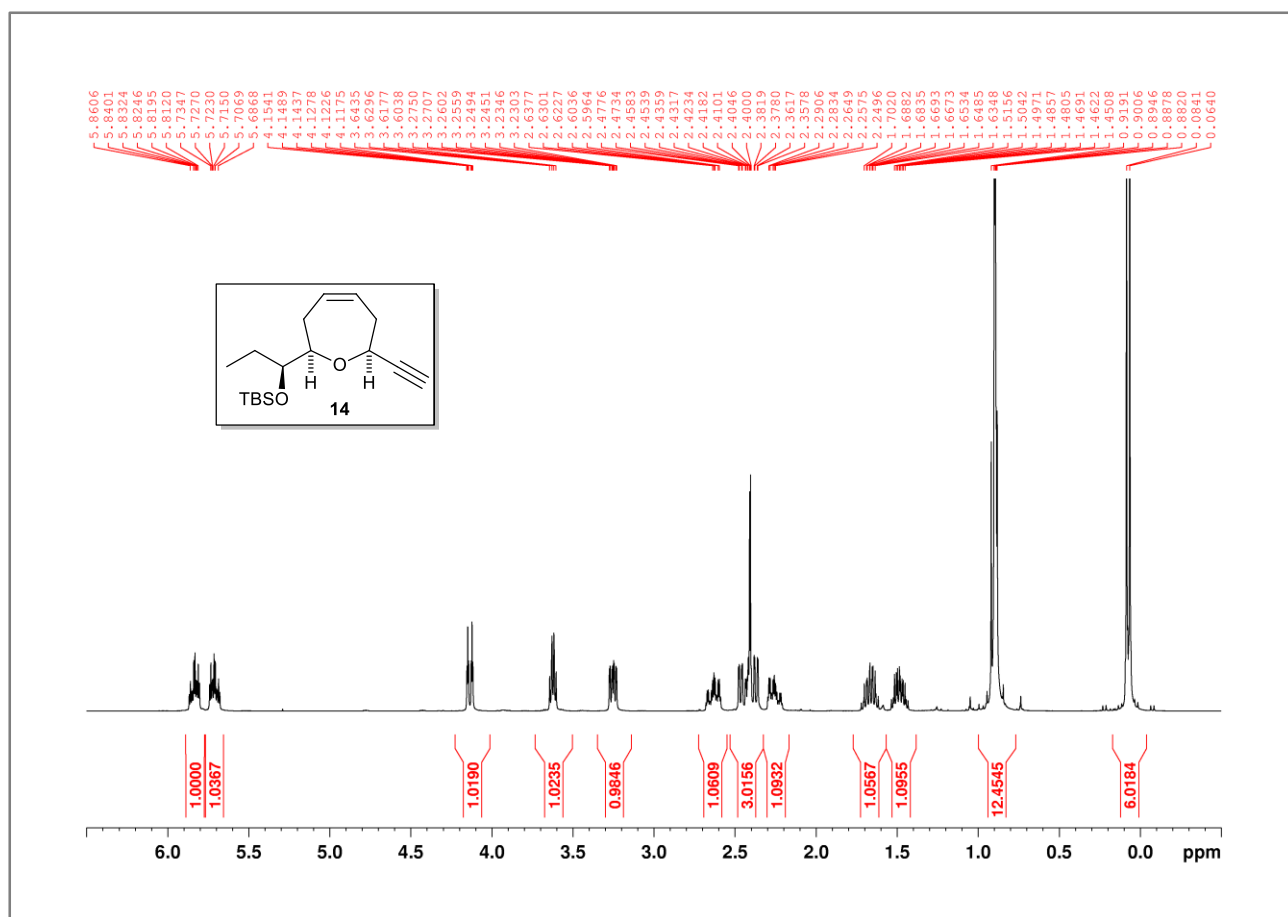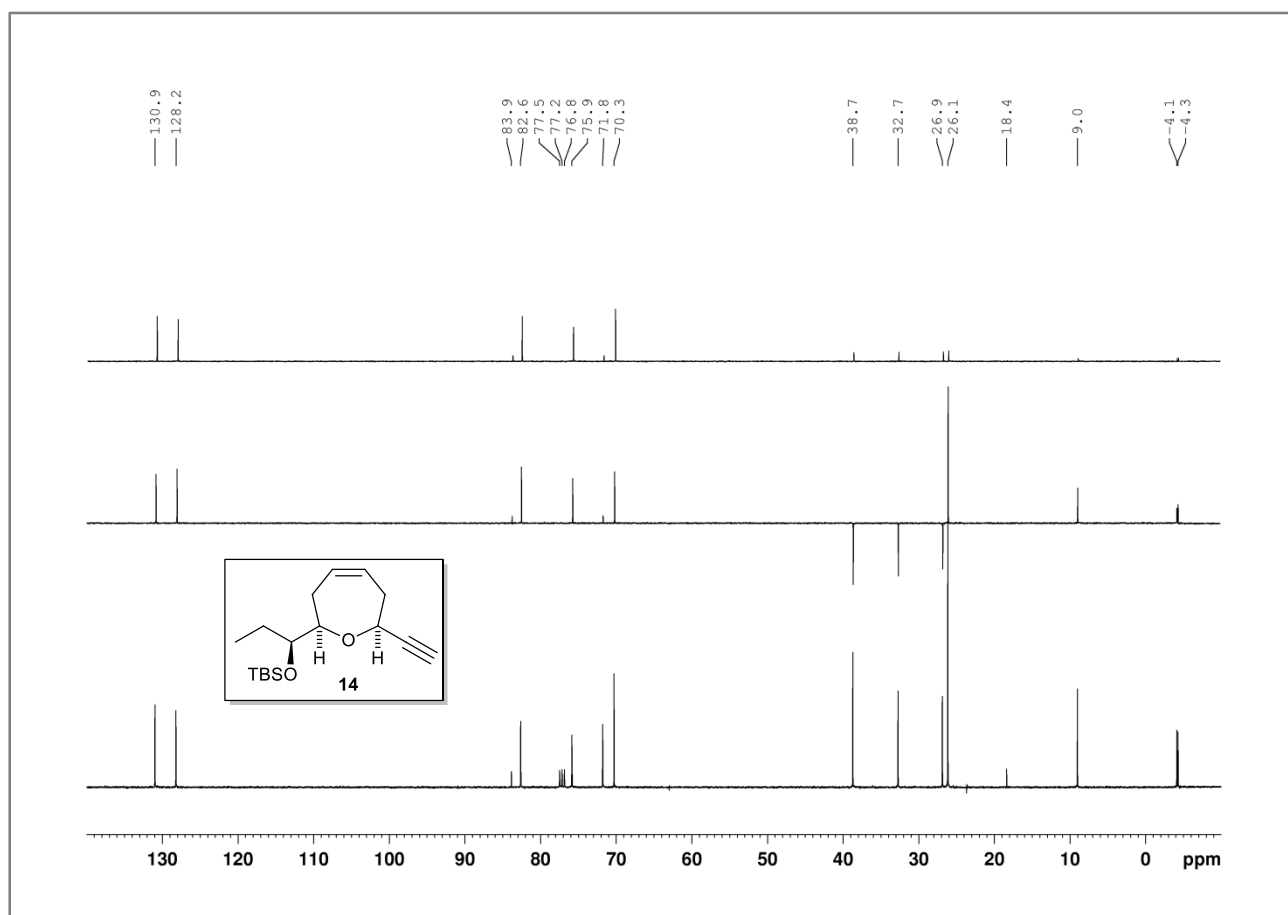

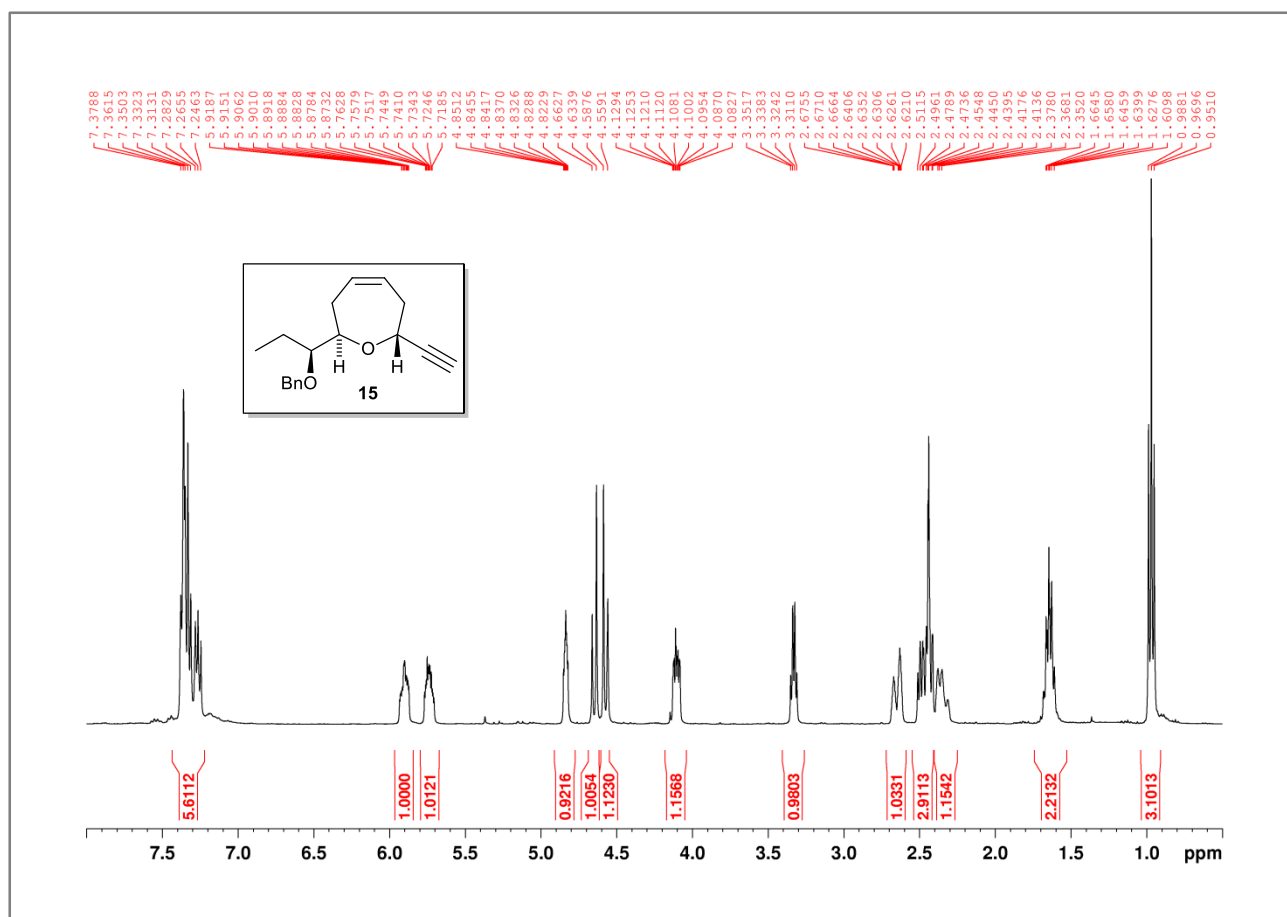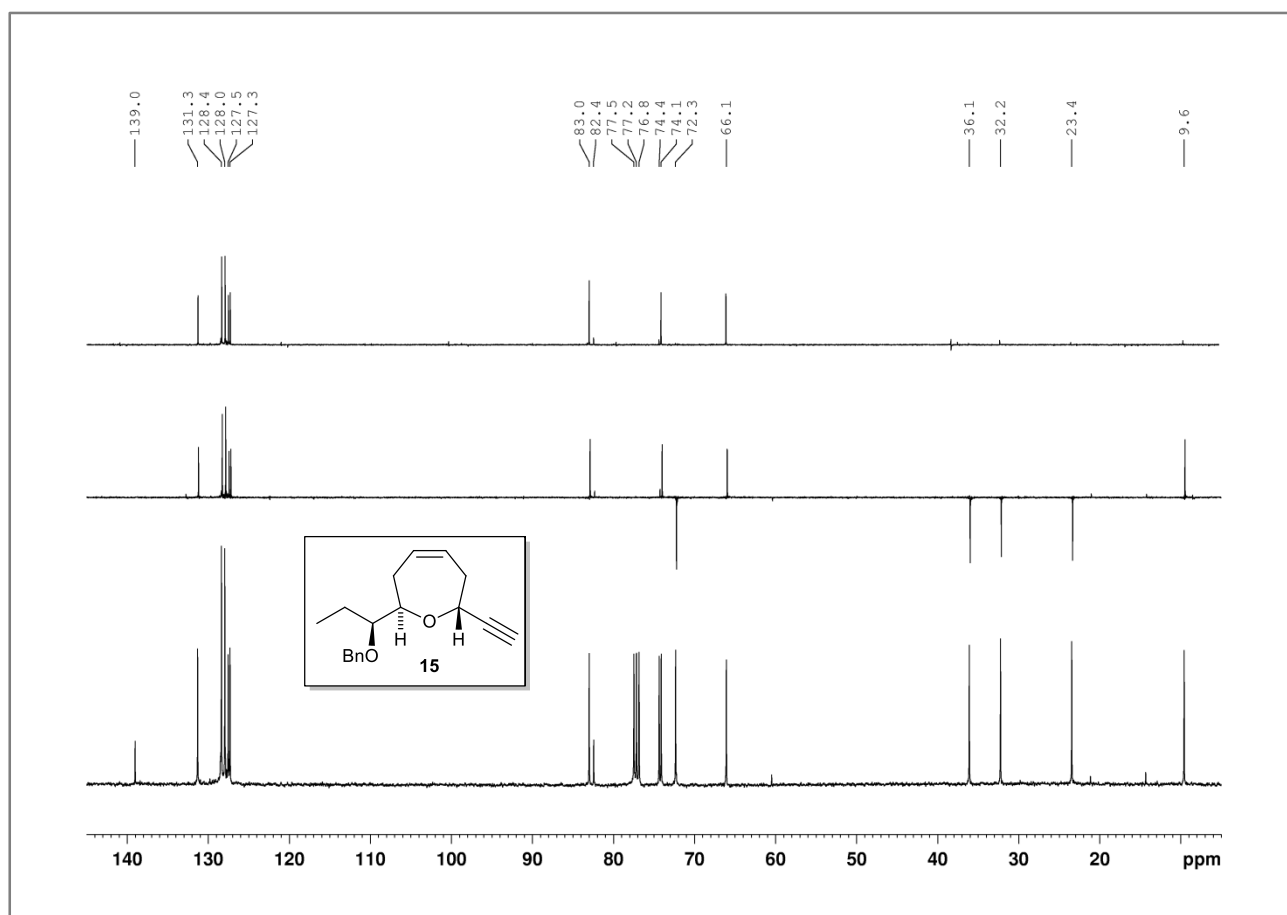

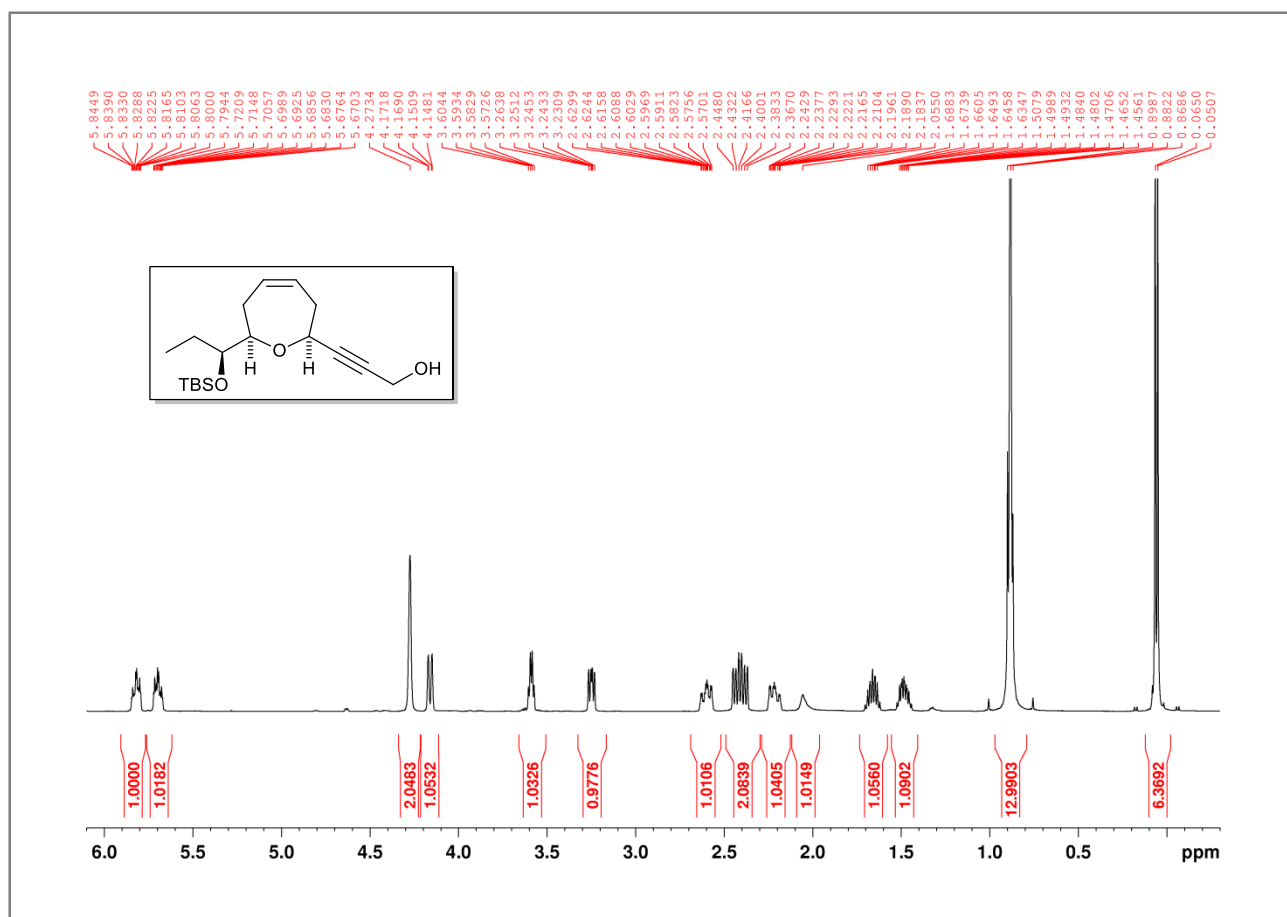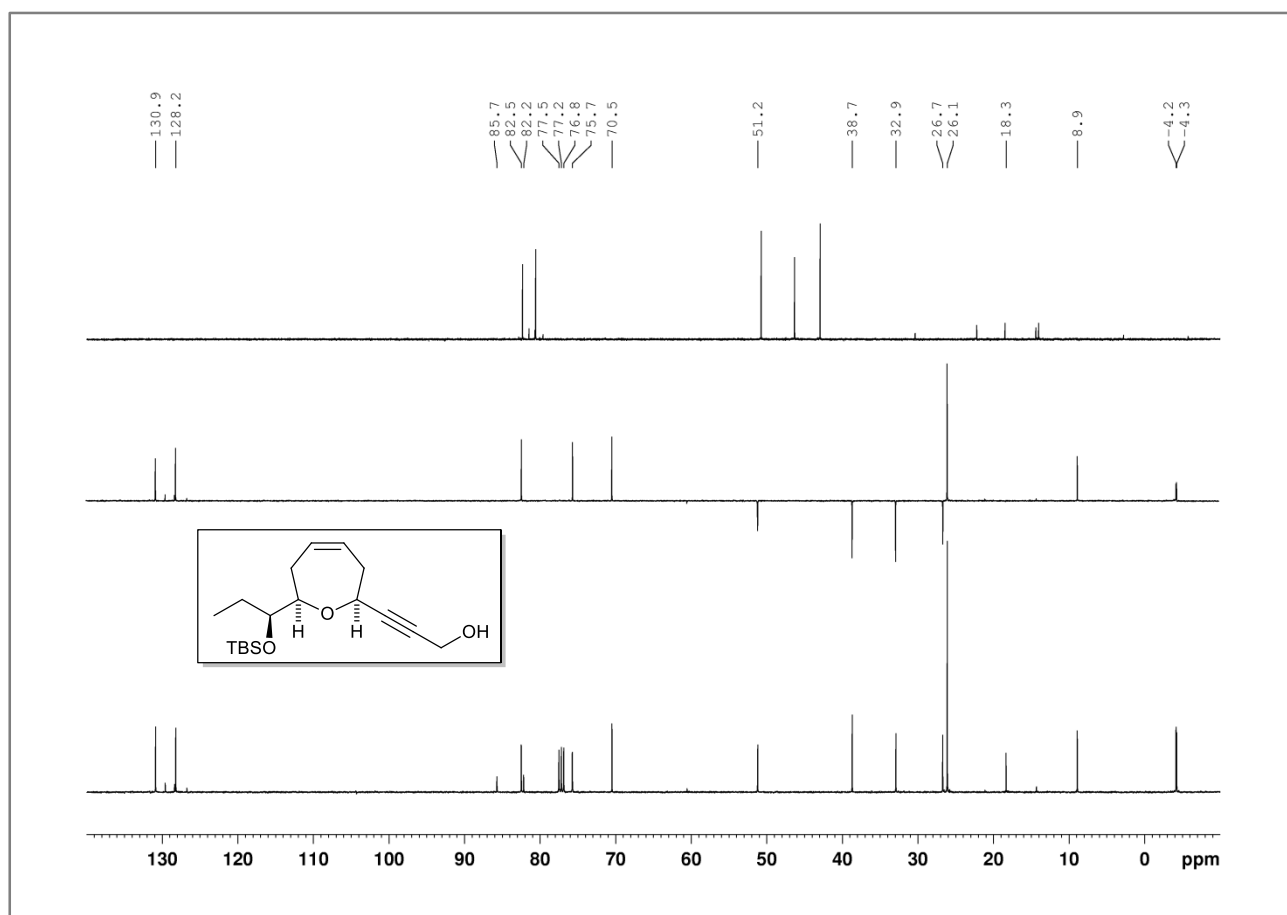

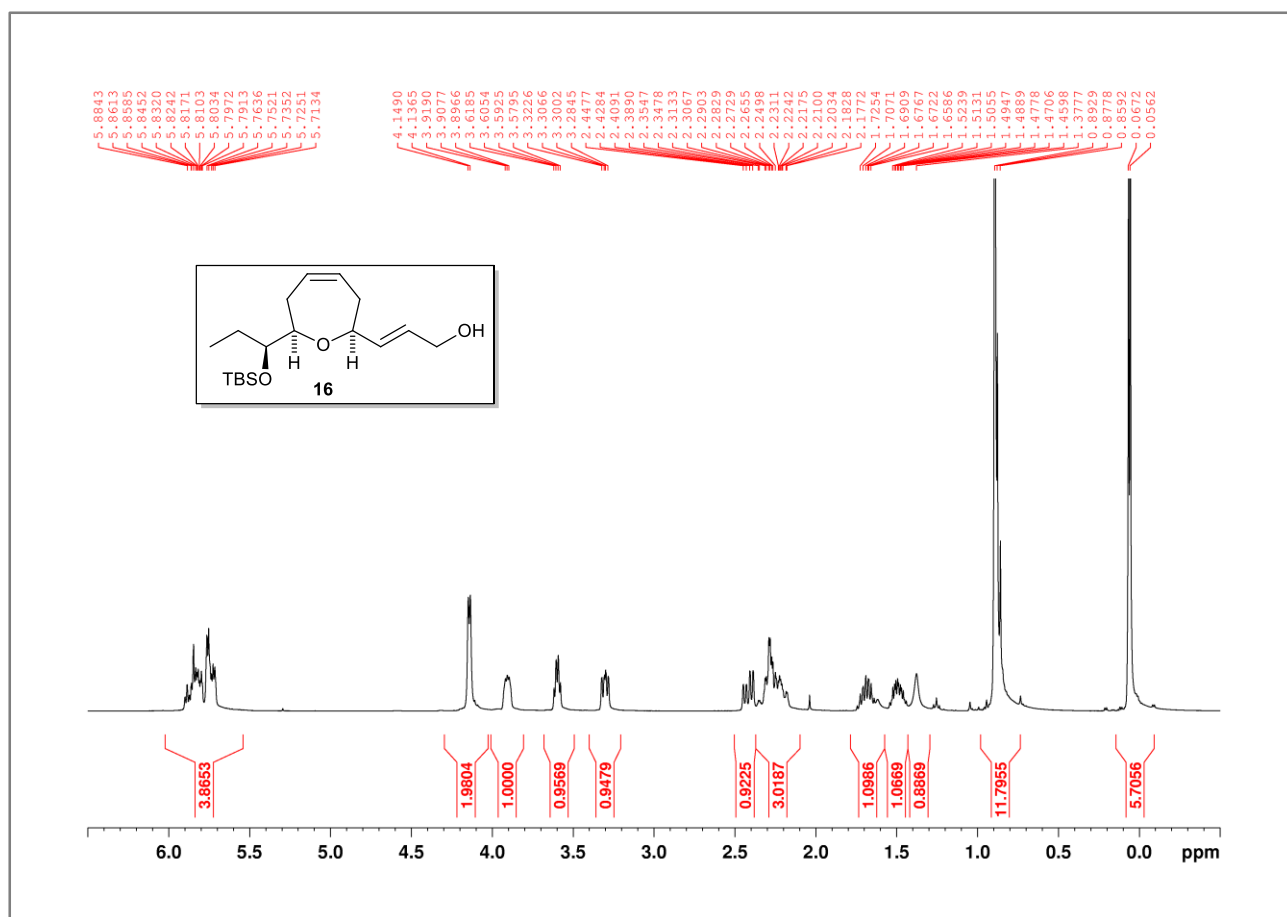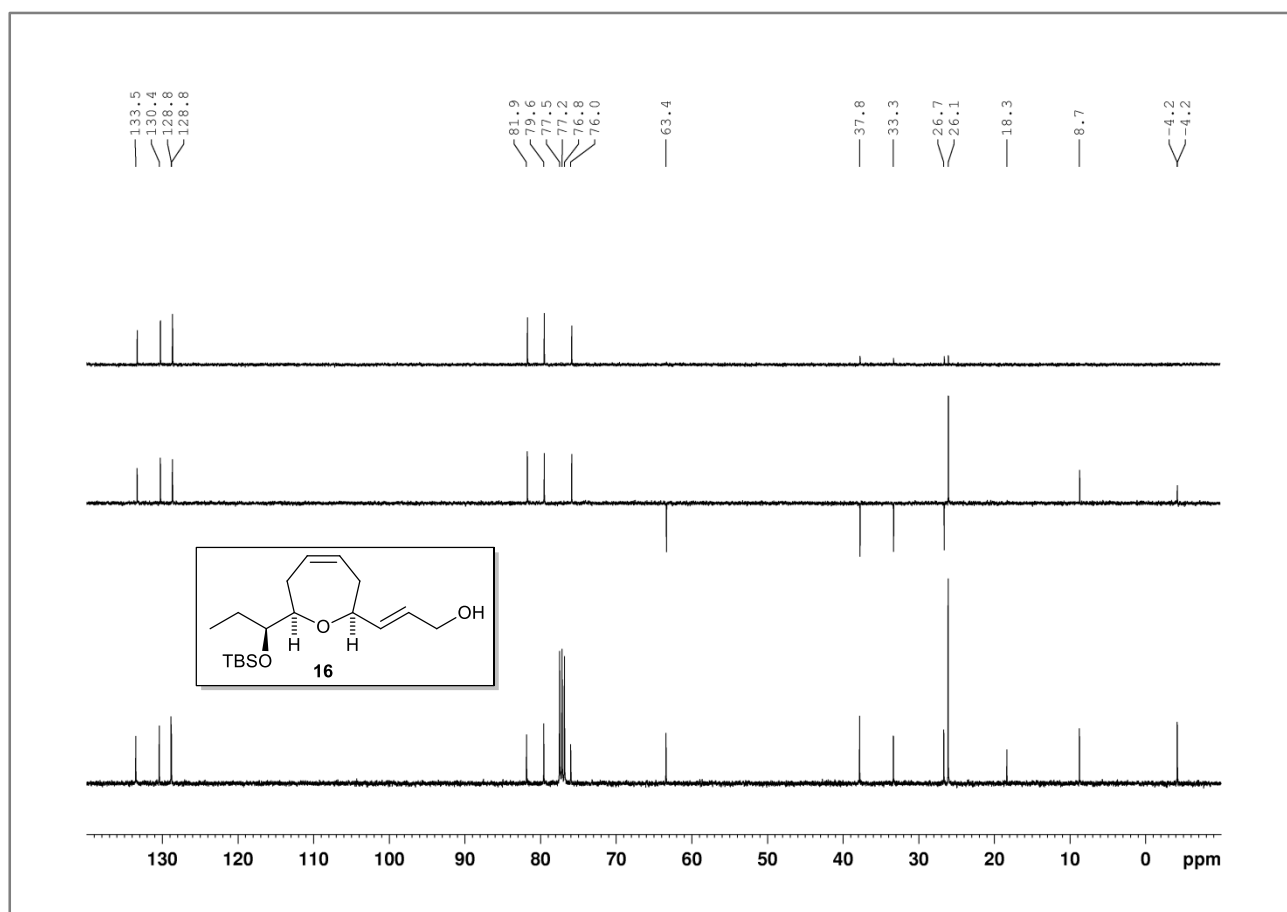

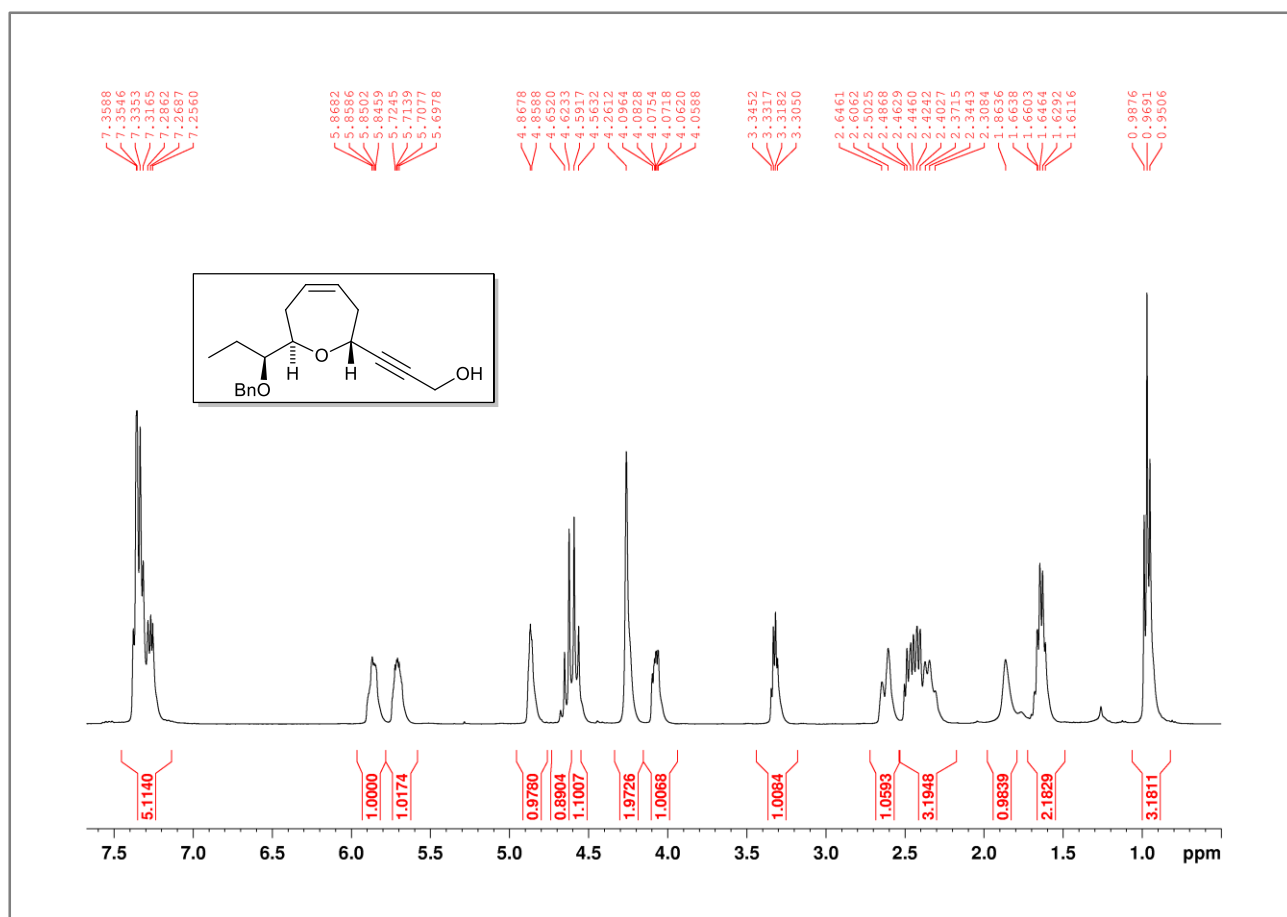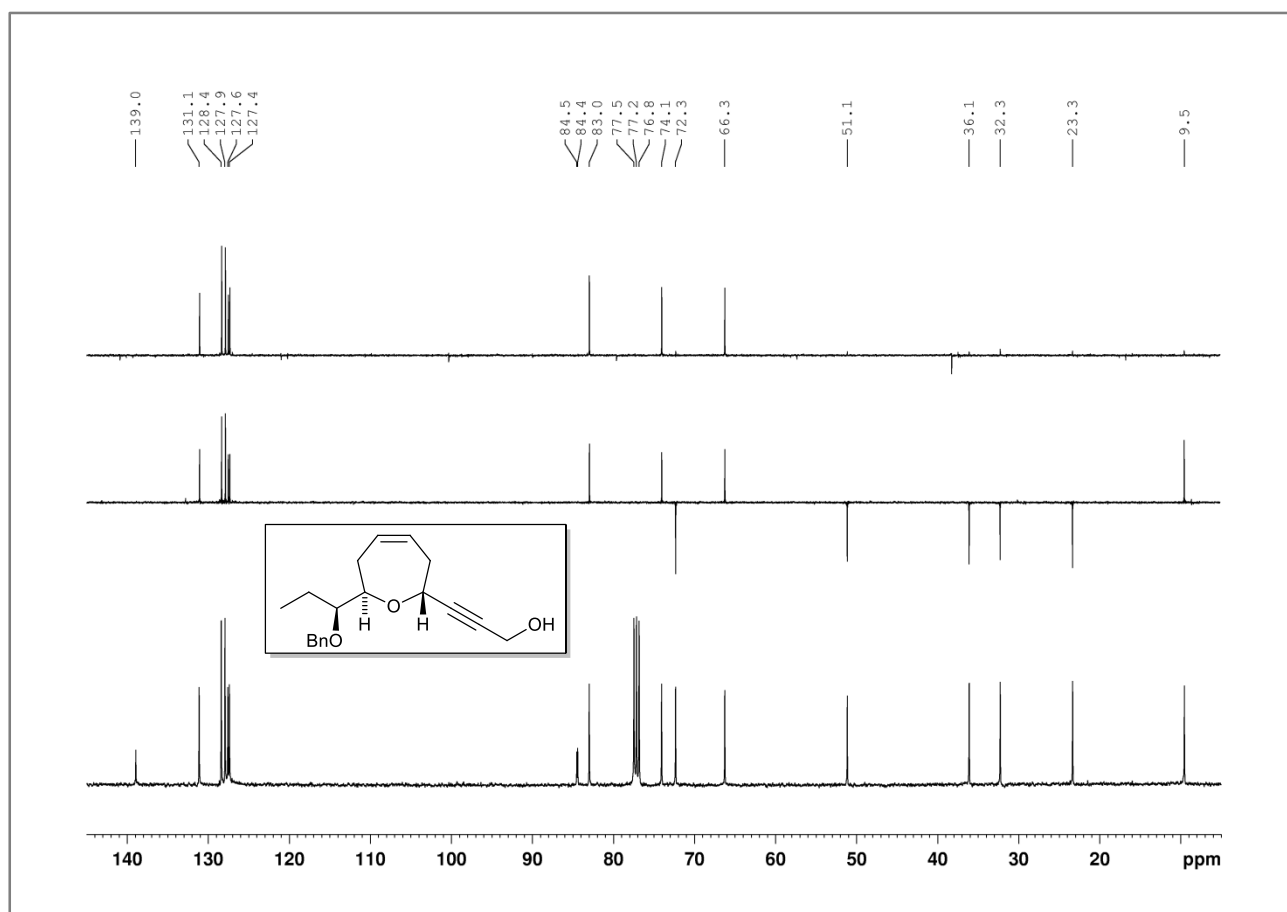

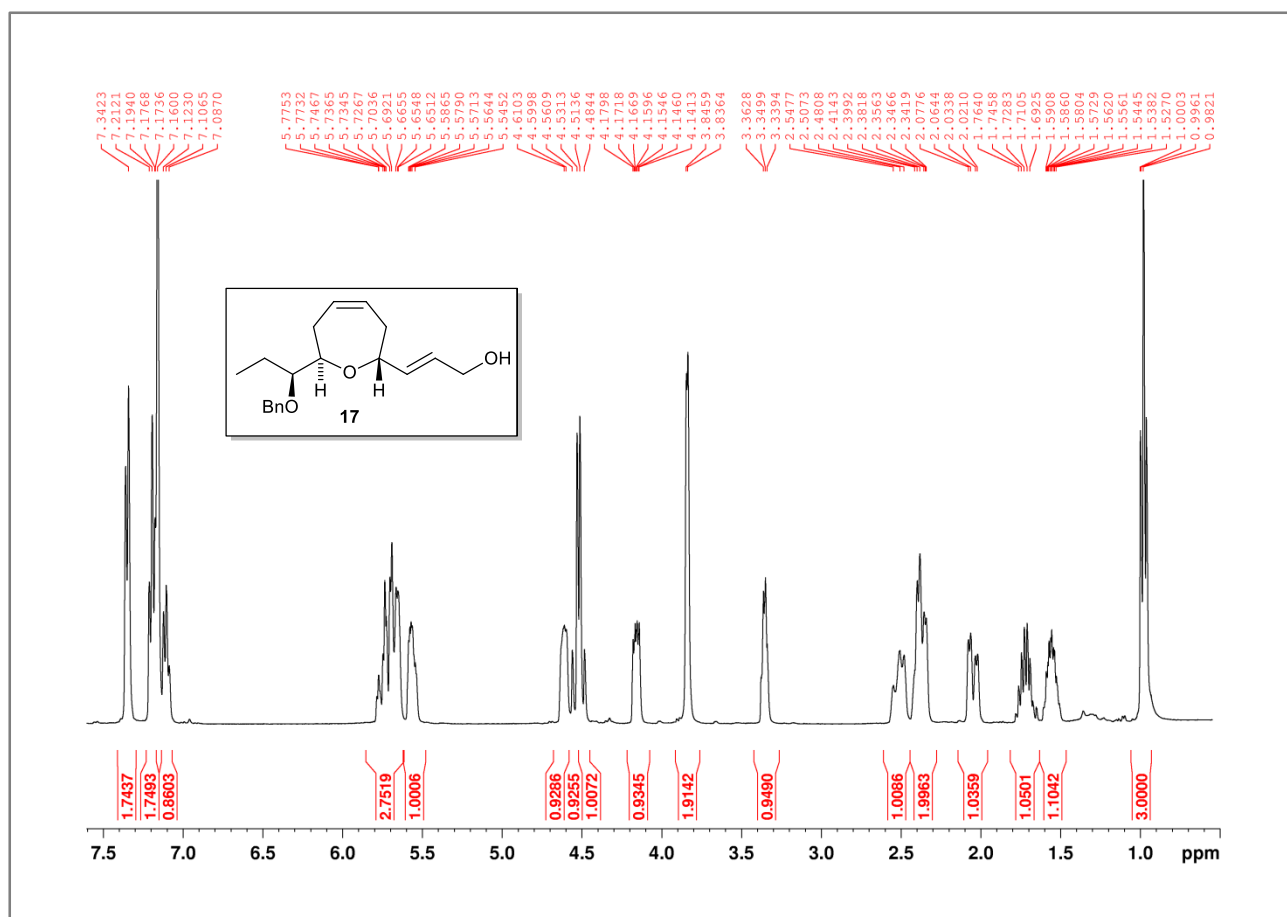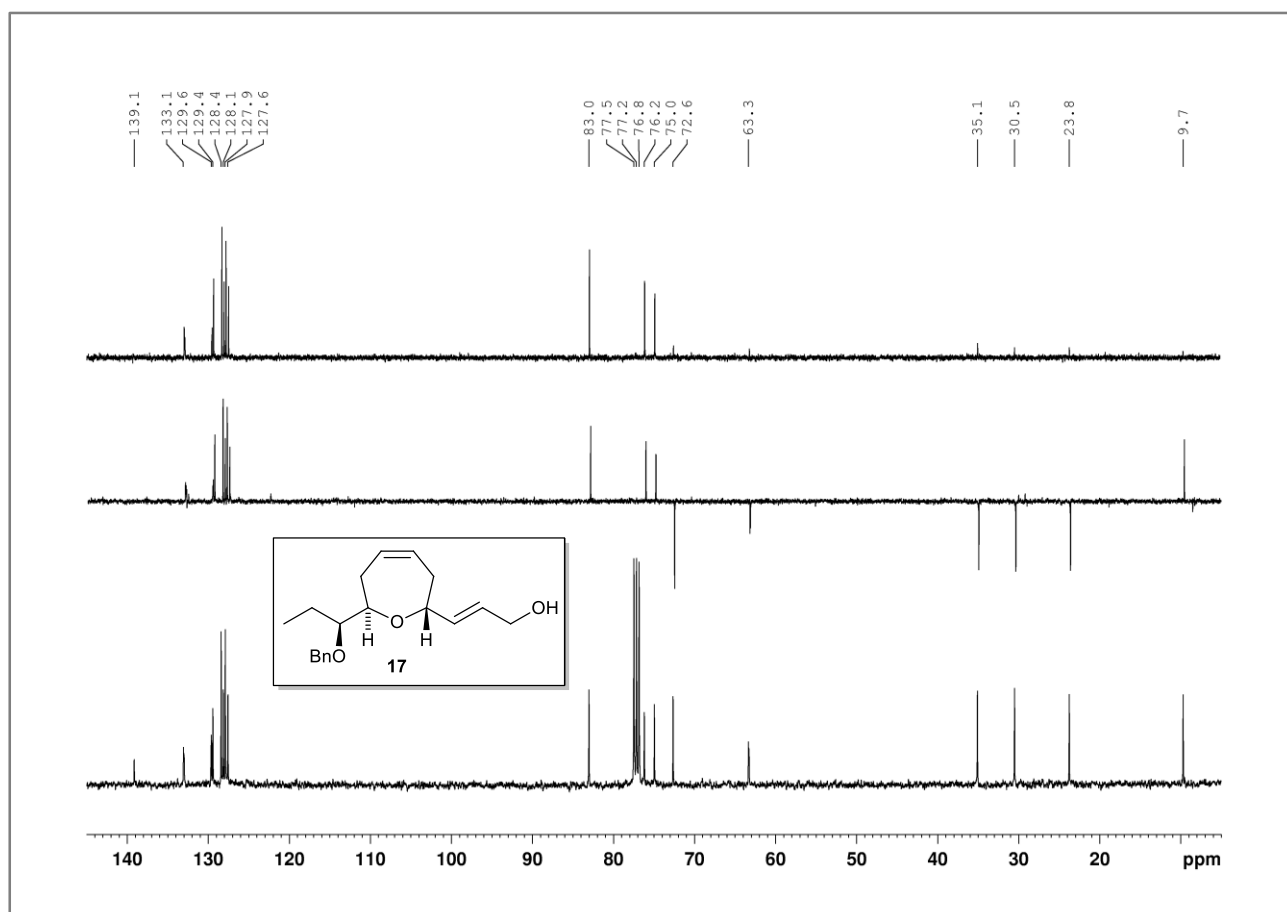

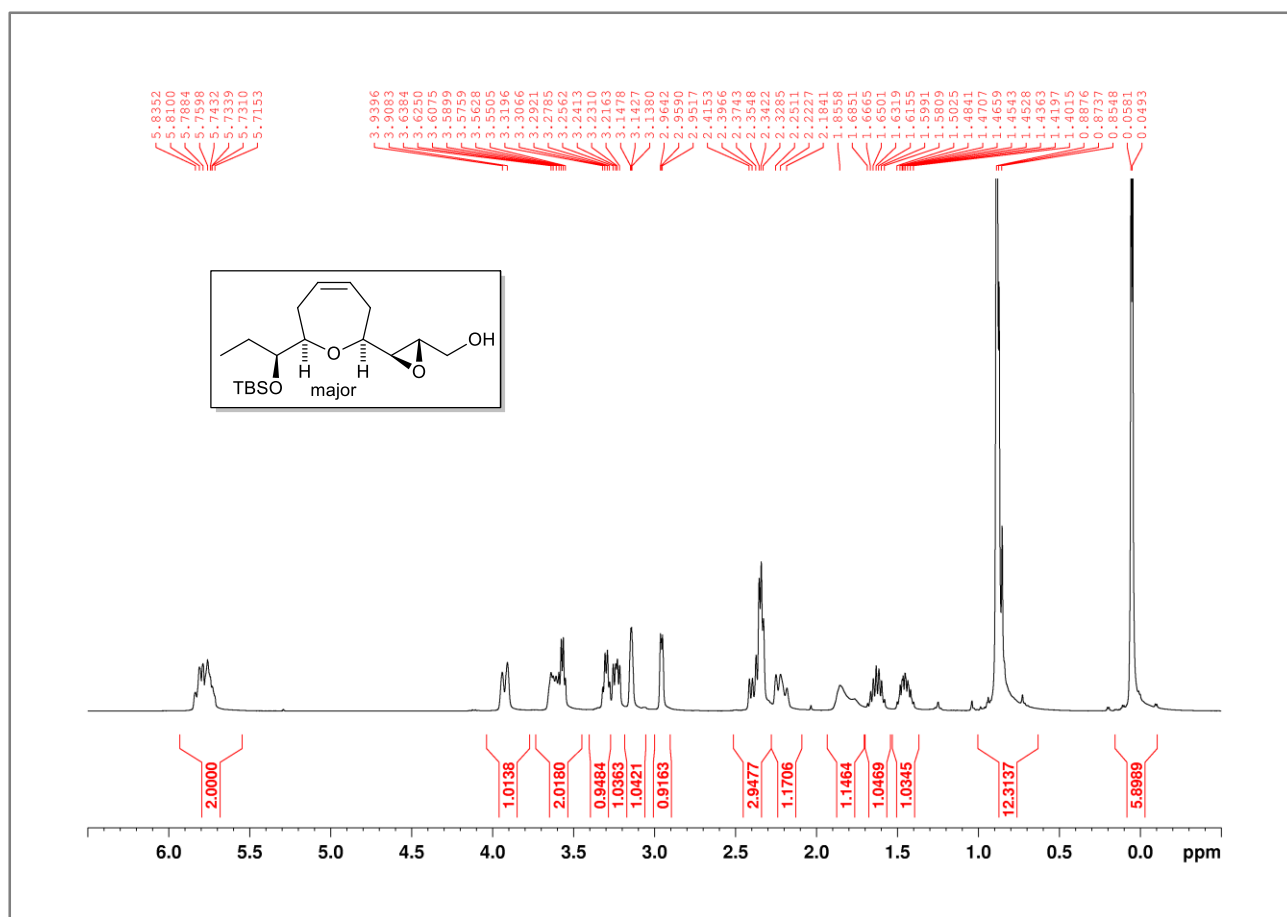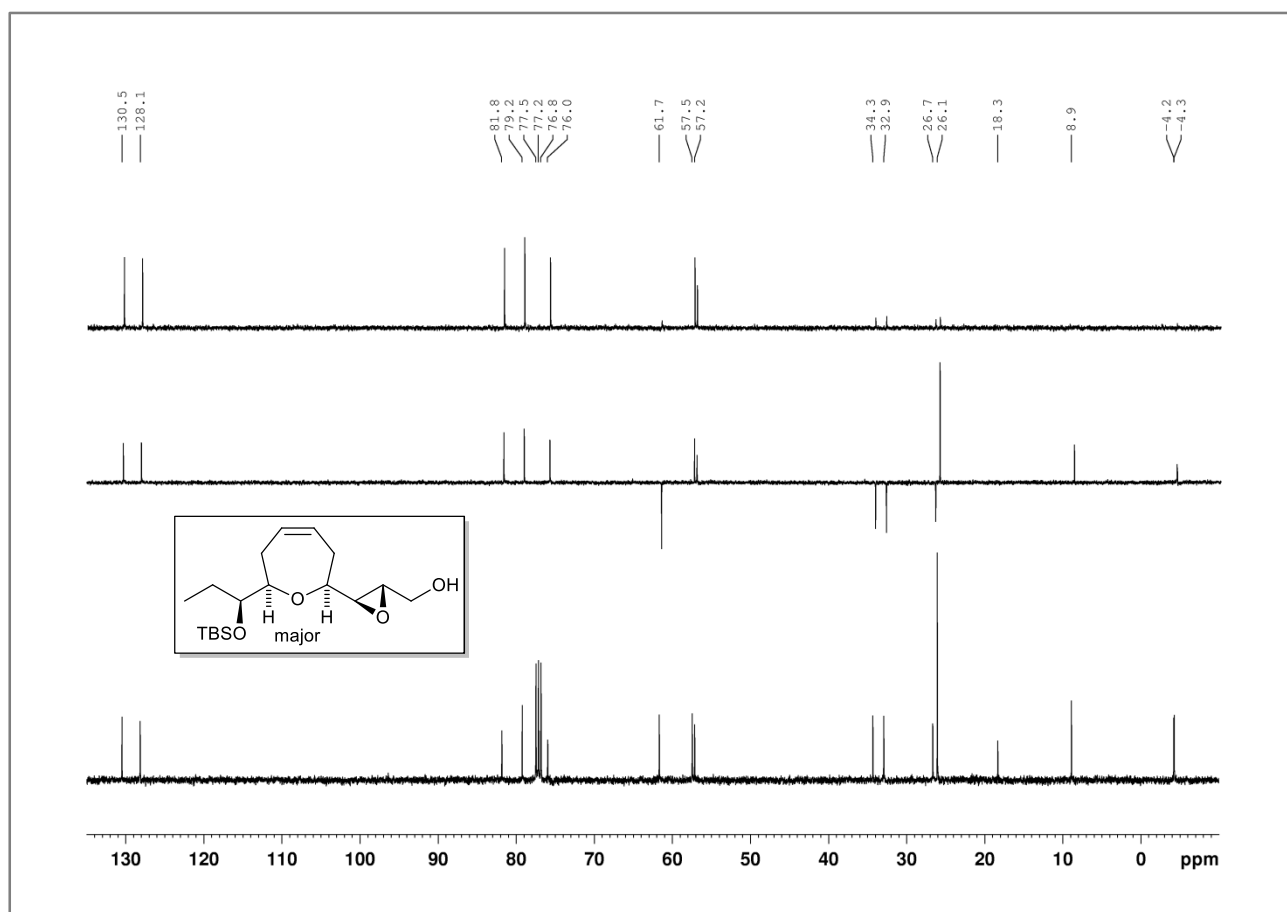

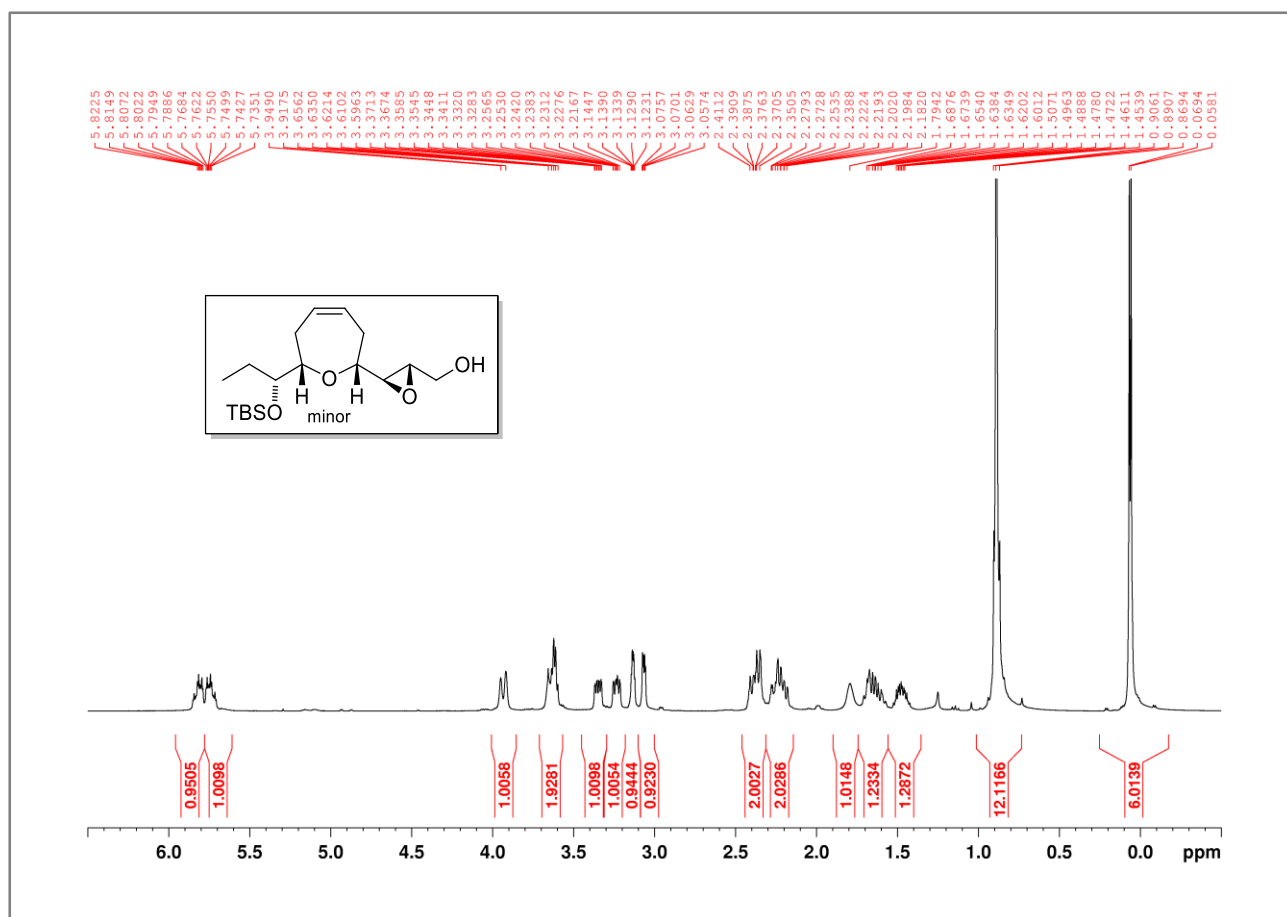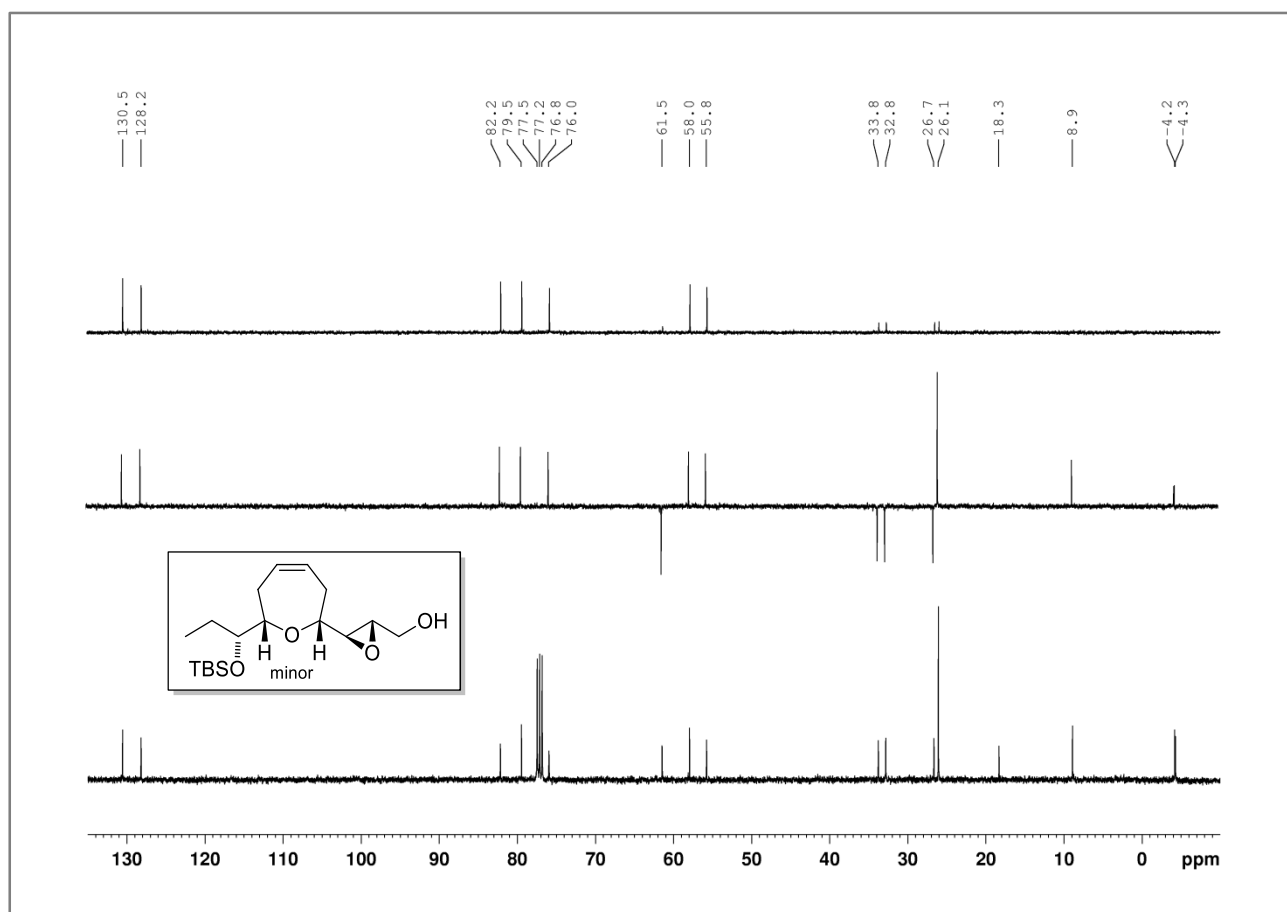

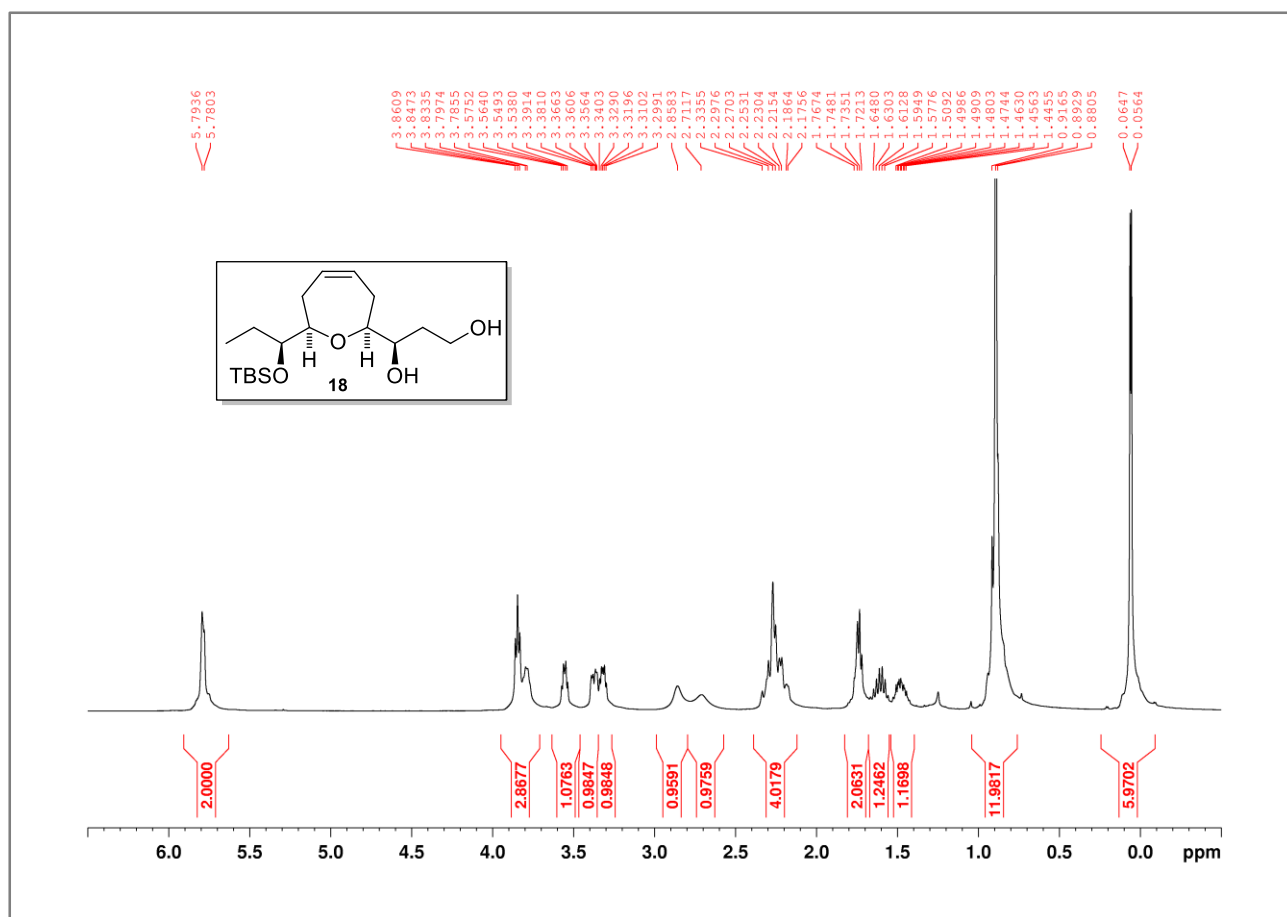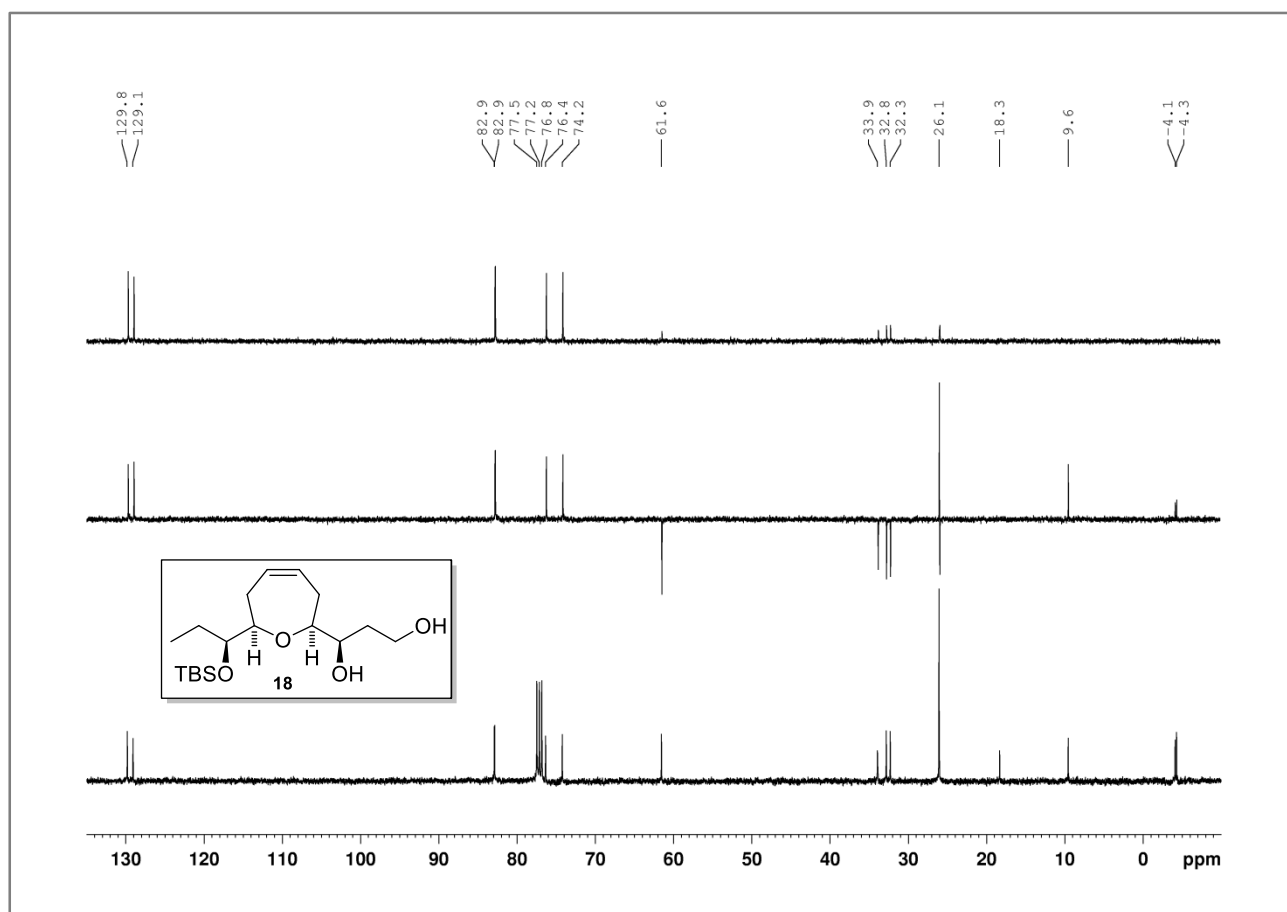

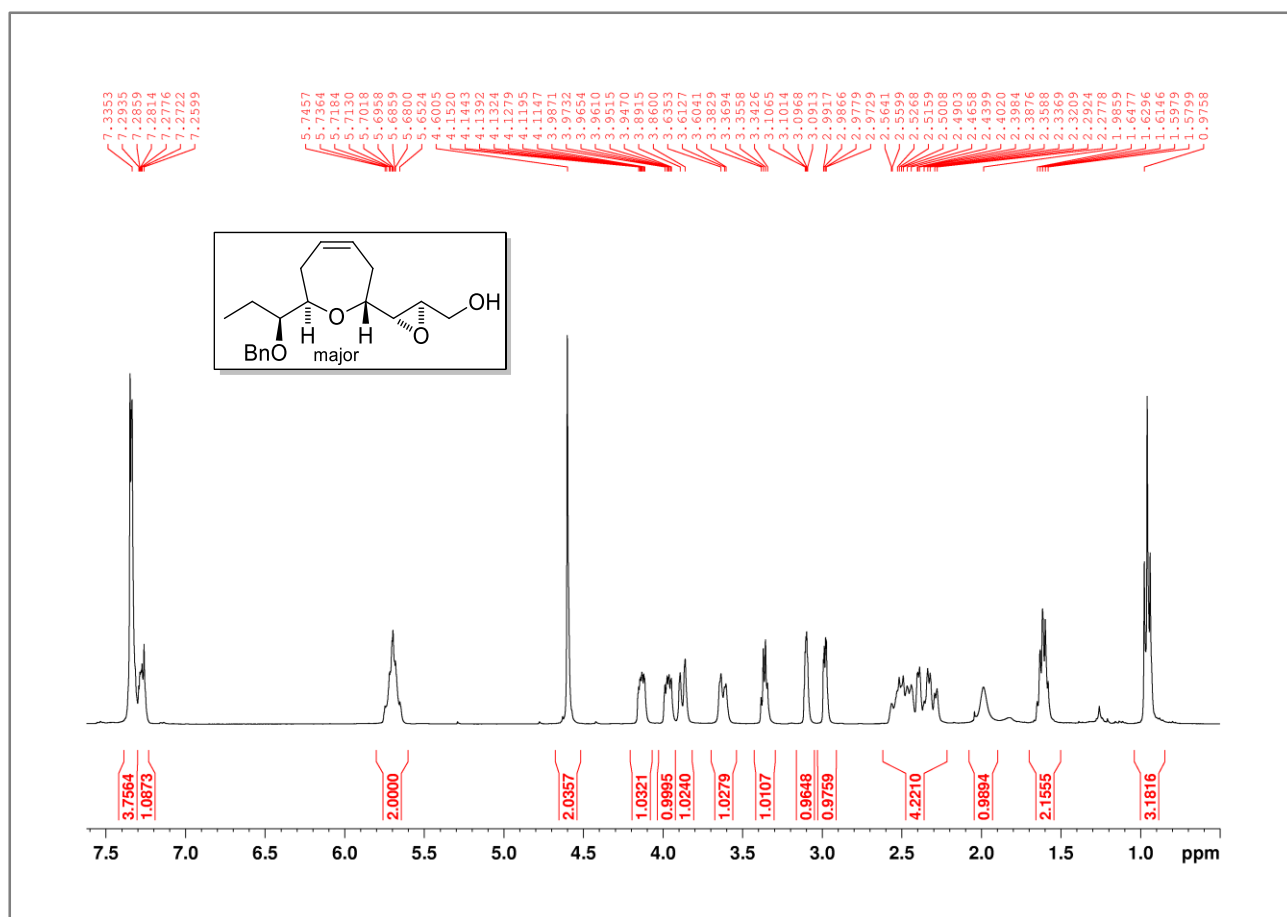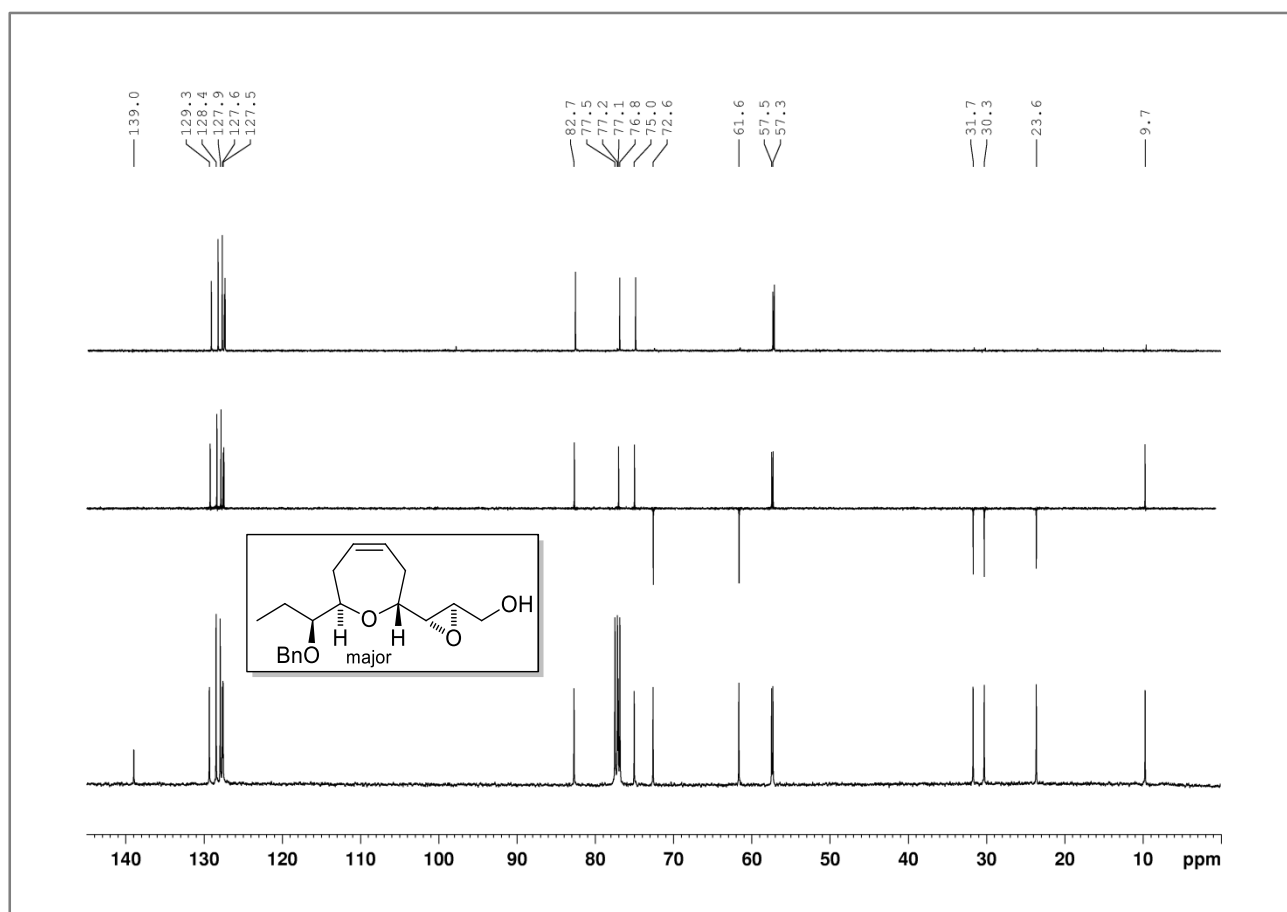

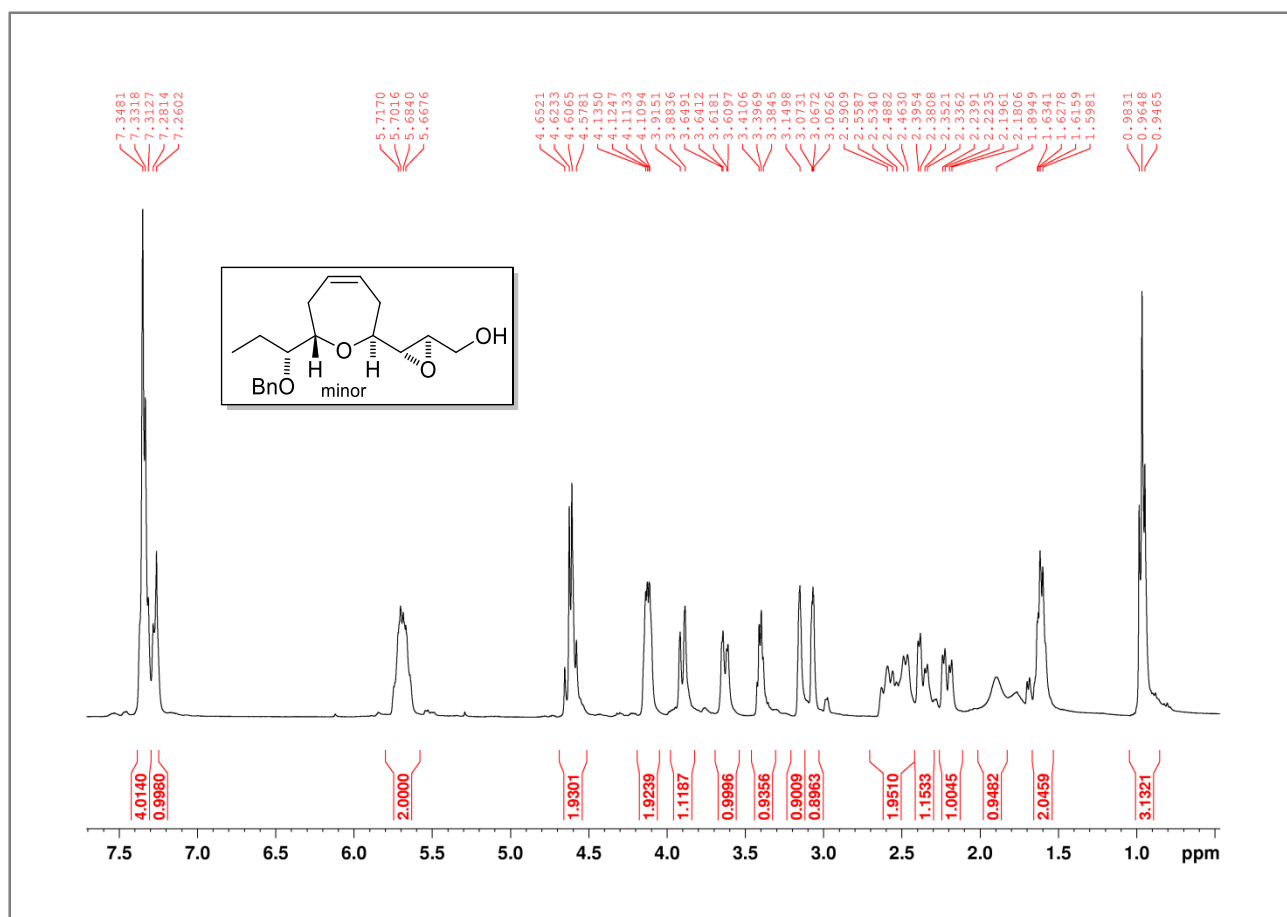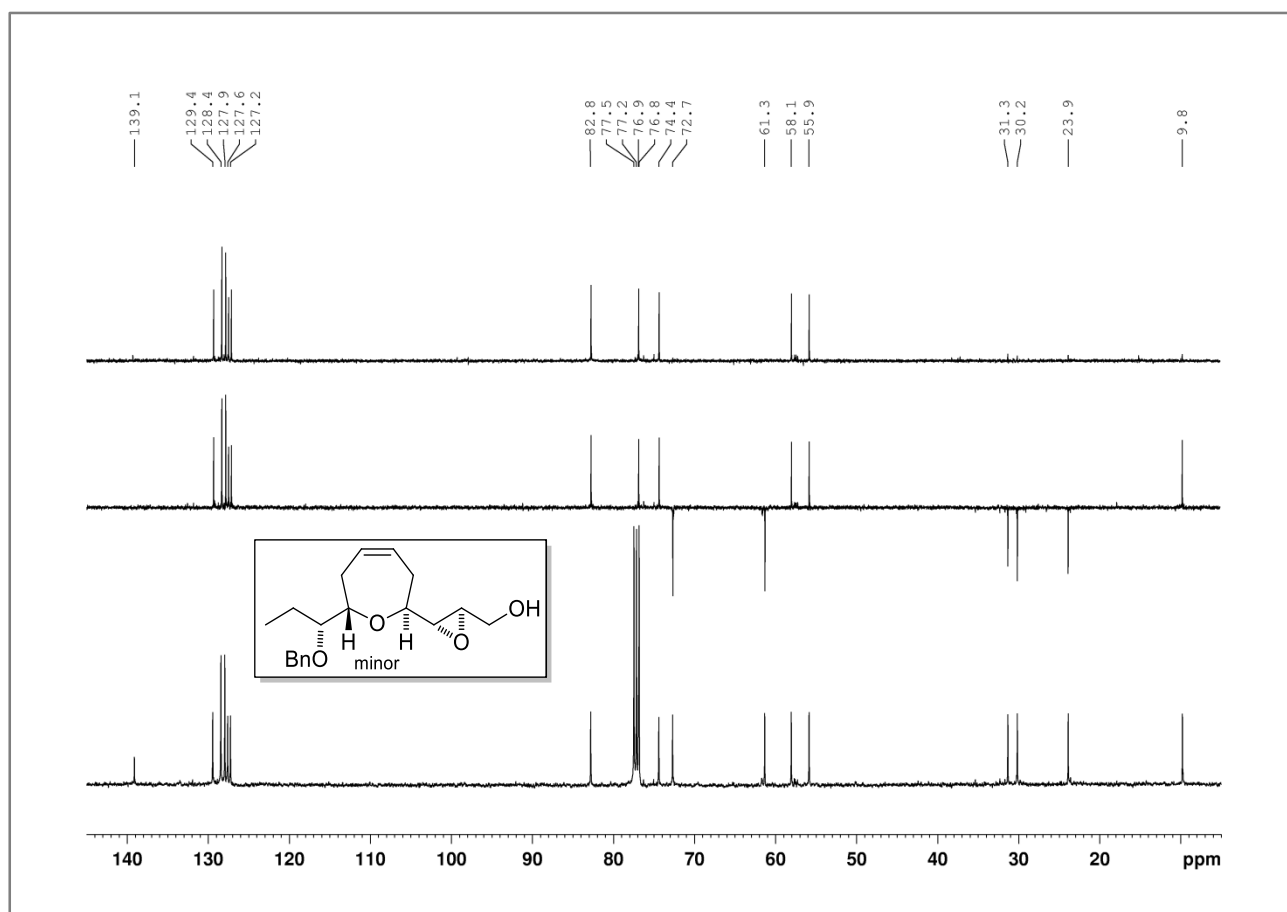

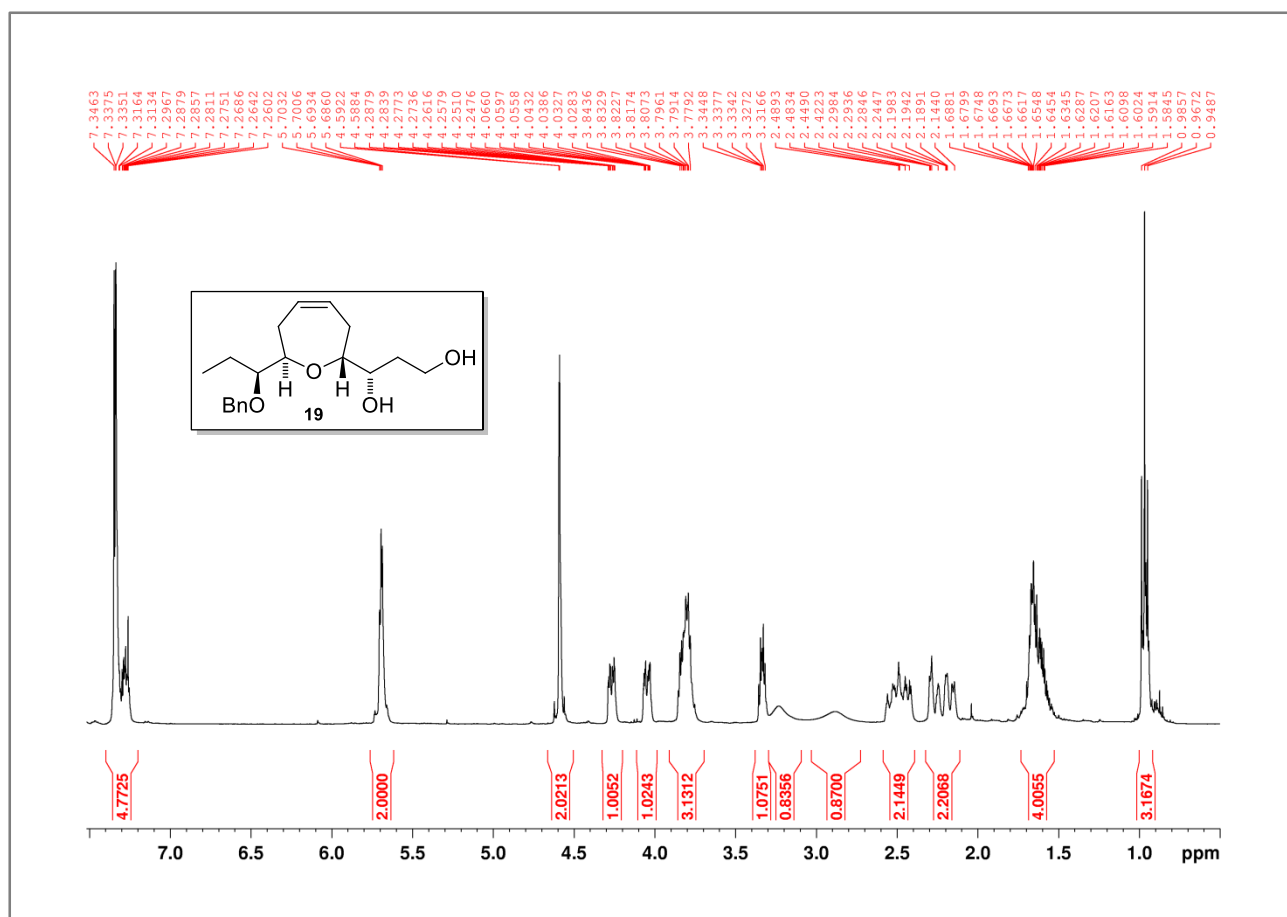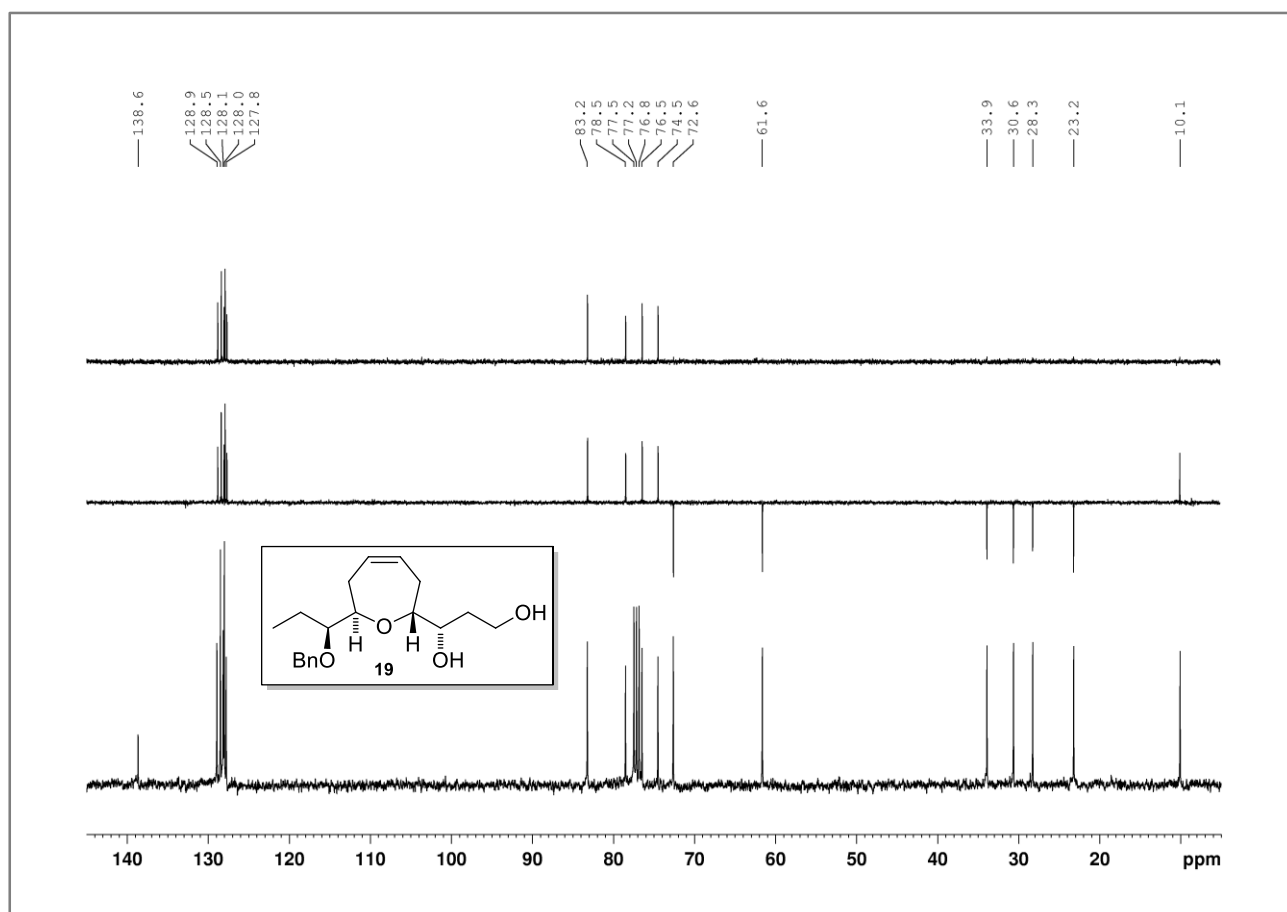

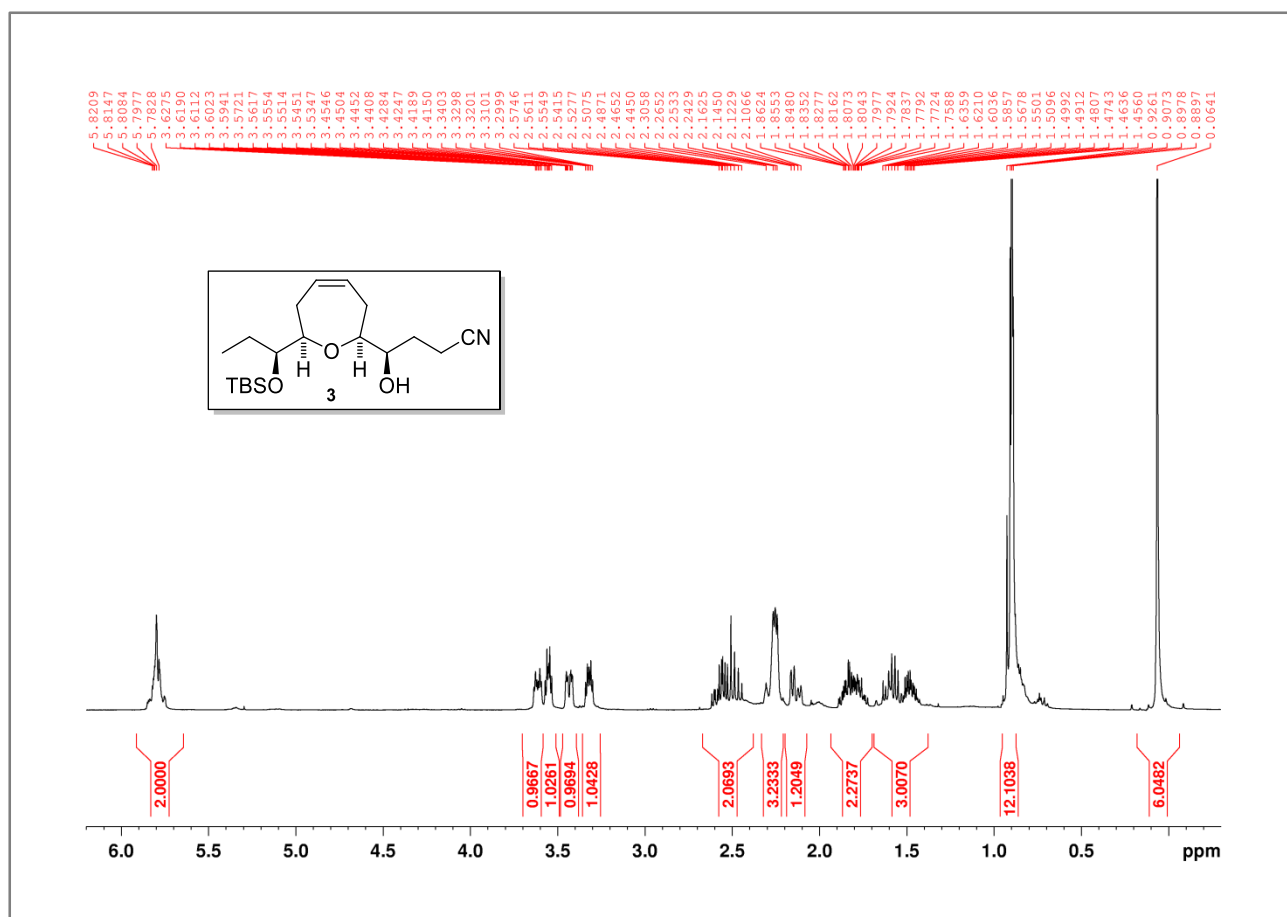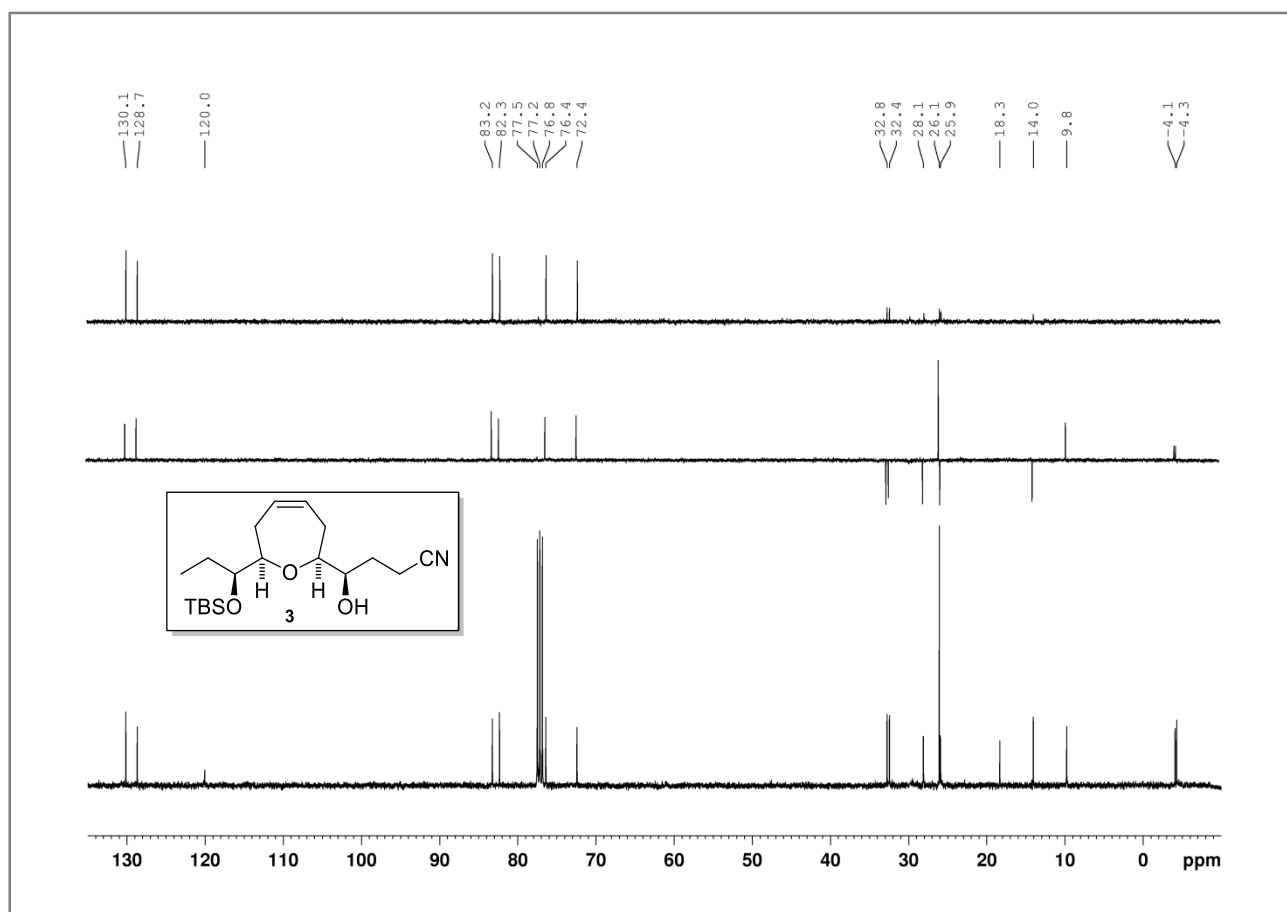

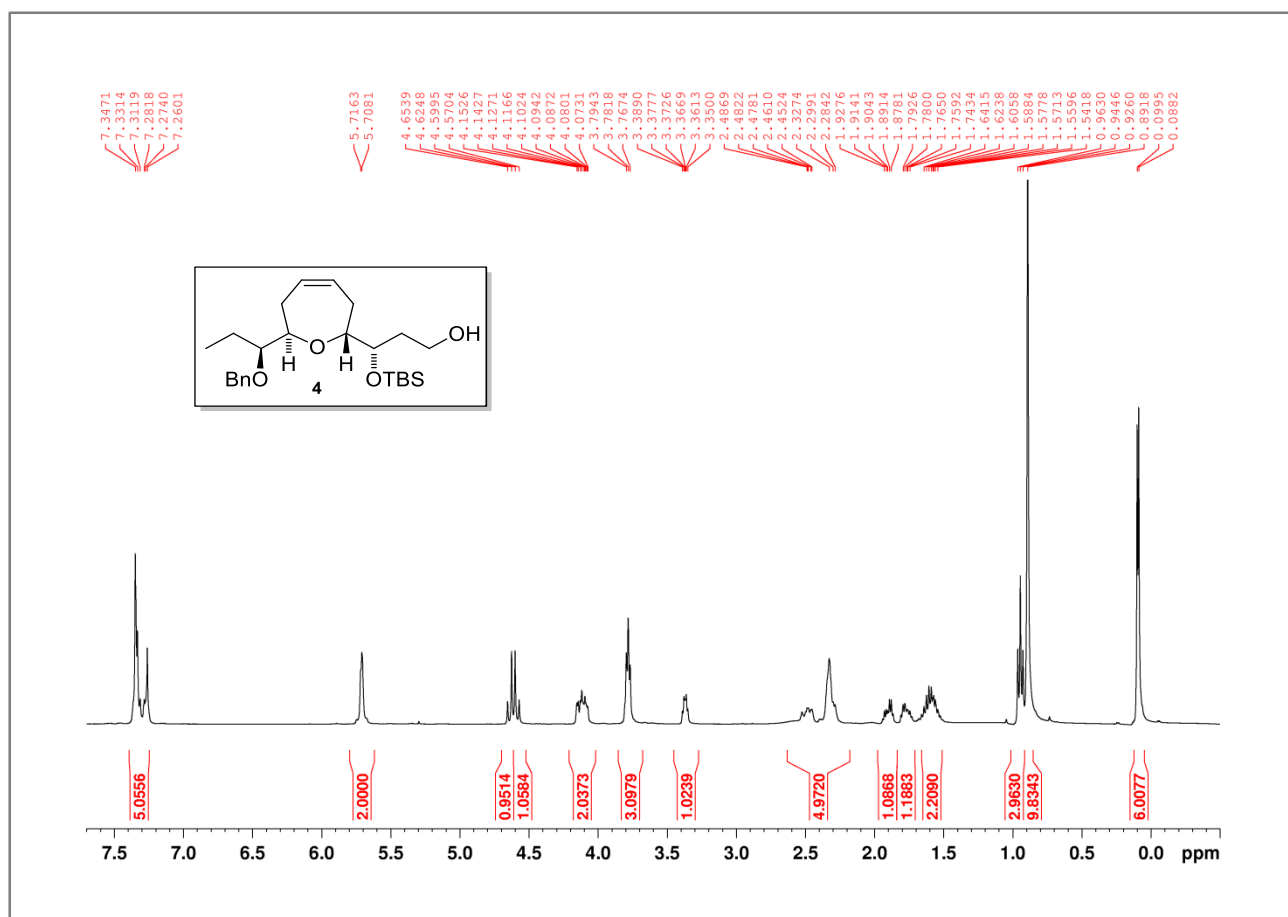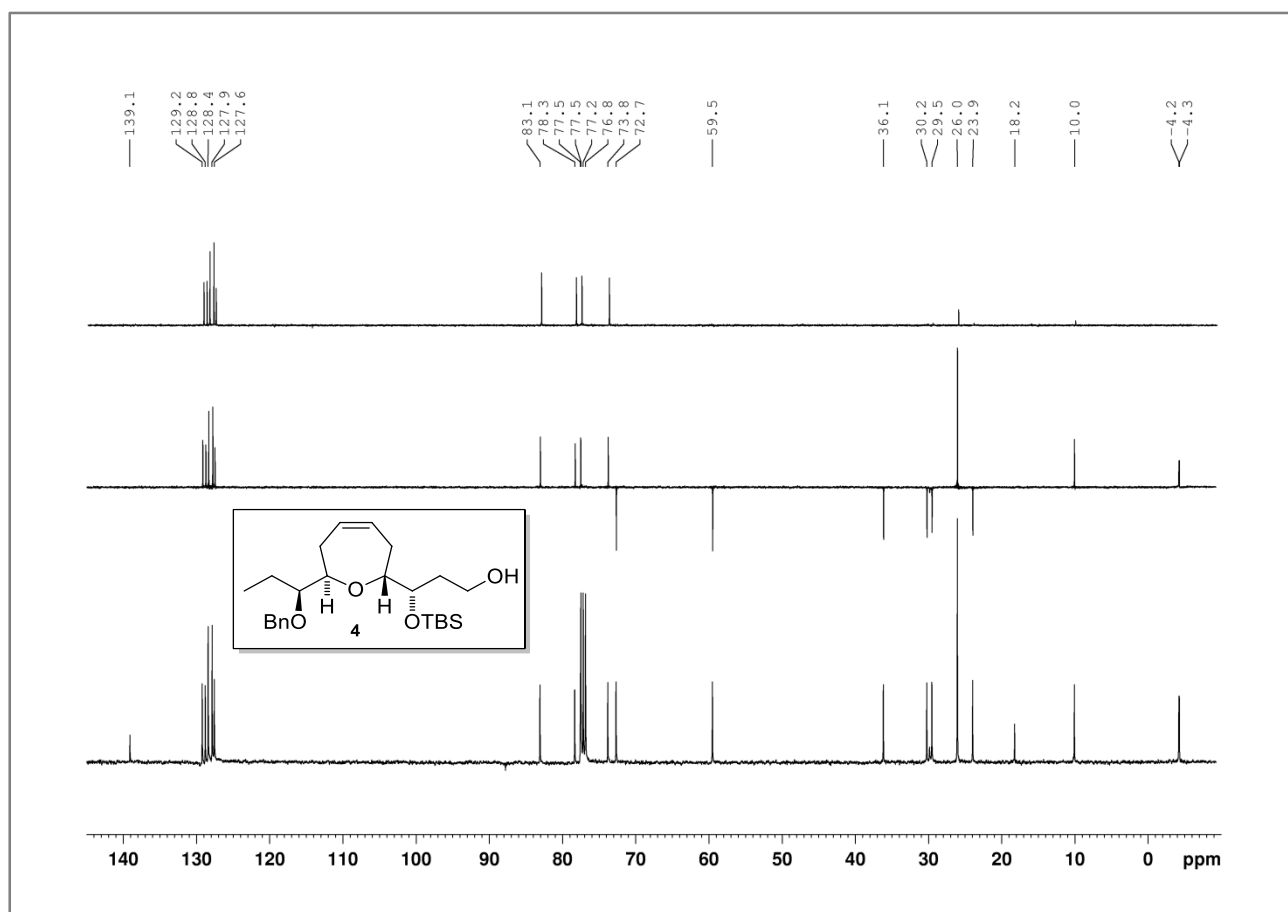

Supplement: c4cc00389f1.pdf [file c4cc00389f1.pdf]
